# Supplementary material for: Variability in Cochlear Implantation Outcomes in a Large German Cohort With a Genetic Etiology of Hearing Loss
Source: PubMed Central journal article supplement — Ear Hear. 2023 Jul 13;44(6):1464–84. doi: 10.1097/AUD.0000000000001386 (PMC10583923; doi:10.1097/aud.0000000000001386), 2023-07-13

**fig. 4A**

| Genes         | 65 dB<br>median single gene | number     |
|---------------|-----------------------------|------------|
| COL11A1 n= 1  | 0                           | 1          |
| EDNRB n= 1    | 0                           | 1          |
| PTPRQ n= 1    | 20                          | 1          |
| TMPRSS3 n= 9  | 30                          | 9          |
| WFS1 n= 4     | 32.5                        | 4          |
| CDH23 n= 4    | 35                          | 4          |
| LOXHD1 n= 5   | 35                          | 5          |
| TMIE n= 2     | 50                          | 2          |
| TFAP2A n= 1   | 50                          | 1          |
| DIAPH1 n= 2   | 52.5                        | 2          |
| MARVELD2 n= 4 | 52.5                        | 4          |
| EYA4 n= 1     | 55                          | 1          |
| SMPX n= 3     | 60                          | 3          |
| COL2A1 n= 1   | 60                          | 1          |
| MYH14 n= 3    | 60                          | 3          |
| MYO7A n= 4    | 67.5                        | 4          |
| COL4A3 n= 4   | 70                          | 4          |
| OTOF n= 2     | 70                          | 2          |
| MT-TL1 n= 1   | 70                          | 1          |
| POU4F3 n= 1   | 70                          | 1          |
| MYO6 n= 3     | 75                          | 3          |
| USH2A n= 5    | 75                          | 5          |
| COCH n= 1     | 75                          | 1          |
| MYO3A n= 2    | 75                          | 2          |
| MYO15A n= 8   | 77.5                        | 8          |
| SLC26A4 n= 6  | 77.5                        | 6          |
| GJB2 n= 26    | 80                          | 26         |
| KCNE1 n= 2    | 80                          | 2          |
| POU3F4 n= 2   | 85                          | 2          |
| RRM2B n= 1    | 85                          | 1          |
| MITF n= 4     | 90                          | 4          |
| PAX3 n= 3     | 90                          | 3          |
| SOX10 n= 2    | 95                          | 2          |
| ACTG1 n= 2    | 97.5                        | 2          |
| LHFPL5 n= 2   | 97.5                        | 2          |
|               | <b>sum</b>                  | <b>123</b> |

**fig. 4B**

---

median 65 dB

|               | Gen      | Neural | Hair Cell | Tectorial Mer | Cochlear Duc |
|---------------|----------|--------|-----------|---------------|--------------|
| EDNRB n= 1    | EDNRB    |        | 0         |               |              |
| TMPRSS3 n= 9  | TMPRSS3  |        | 30        |               |              |
| WFS1 n= 4     | WFS1     |        | 32.5      |               |              |
| TFAP2A n= 1   | TFAP2A   |        | 50        |               |              |
| DIAPH1 n= 2   | DIAPH1   |        | 52.5      |               |              |
| EYA4 n= 1     | EYA4     |        | 55        |               |              |
| PAX3 n= 3     | PAX3     |        | 90        |               |              |
| SOX10 n= 2    | SOX10    |        | 95        |               |              |
| PTPRQ n= 1    | PTPRQ    |        |           | 20            |              |
| CDH23 n= 4    | CDH23    |        |           | 35            |              |
| LOXHD1 n= 5   | LOXHD1   |        |           | 35            |              |
| TMIE n= 2     | TMIE     |        |           | 50            |              |
| MARVELD2 n= 4 | MARVELD2 |        |           | 52.5          |              |
| SMPX n= 3     | SMPX     |        |           | 60            |              |
| MYH14 n= 3    | MYH14    |        |           | 60            |              |
| MYO7A n= 4    | MYO7A    |        |           | 67.5          |              |
| OTOF n= 2     | OTOF     |        |           | 70            |              |
| POU4F3 n= 1   | POU4F3   |        |           | 70            |              |
| MYO3A n= 2    | MYO3A    |        |           | 75            |              |
| MYO6 n= 3     | MYO6     |        |           | 75            |              |
| USH2A n= 5    | USH2A    |        |           | 75            |              |
| MYO15A n= 8   | MYO15A   |        |           | 77.5          |              |
| ACTG1 n= 2    | ACTG1    |        |           | 97.5          |              |
| LHFPL5 n= 2   | LHFPL5   |        |           | 97.5          |              |
| COL2A1 n= 1   | COL2A1   |        |           | 60            |              |
| COL11A1 n= 1  | COL11A1  |        |           |               | 0            |
| COL4A3 n= 4   | COL4A3   |        |           |               | 70           |
| COCH n= 1     | COCH     |        |           |               | 75           |
| SLC26A4 n= 6  | SLC26A4  |        |           |               | 77.5         |
| GJB2 n= 26    | GJB2     |        |           |               | 80           |
| POU3F4 n= 2   | POU3F4   |        |           |               | 85           |
| MITF n= 4     | MITF     |        |           |               | 90           |
| KCNE1 n= 2    | KCNE1    |        |           |               |              |
| MT-TL1 n= 1   | MT-TL1   |        |           |               |              |
| RRM2B n= 1    | RRM2B    |        |           |               |              |





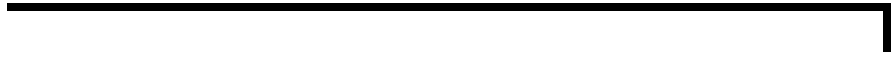

**A**

**Speech discrimination in quiet (%)**  
**Freiburger Monosyllables 65 dB**

**COI -**

**1**









## Cochlear Implant Performance - Single Genes (

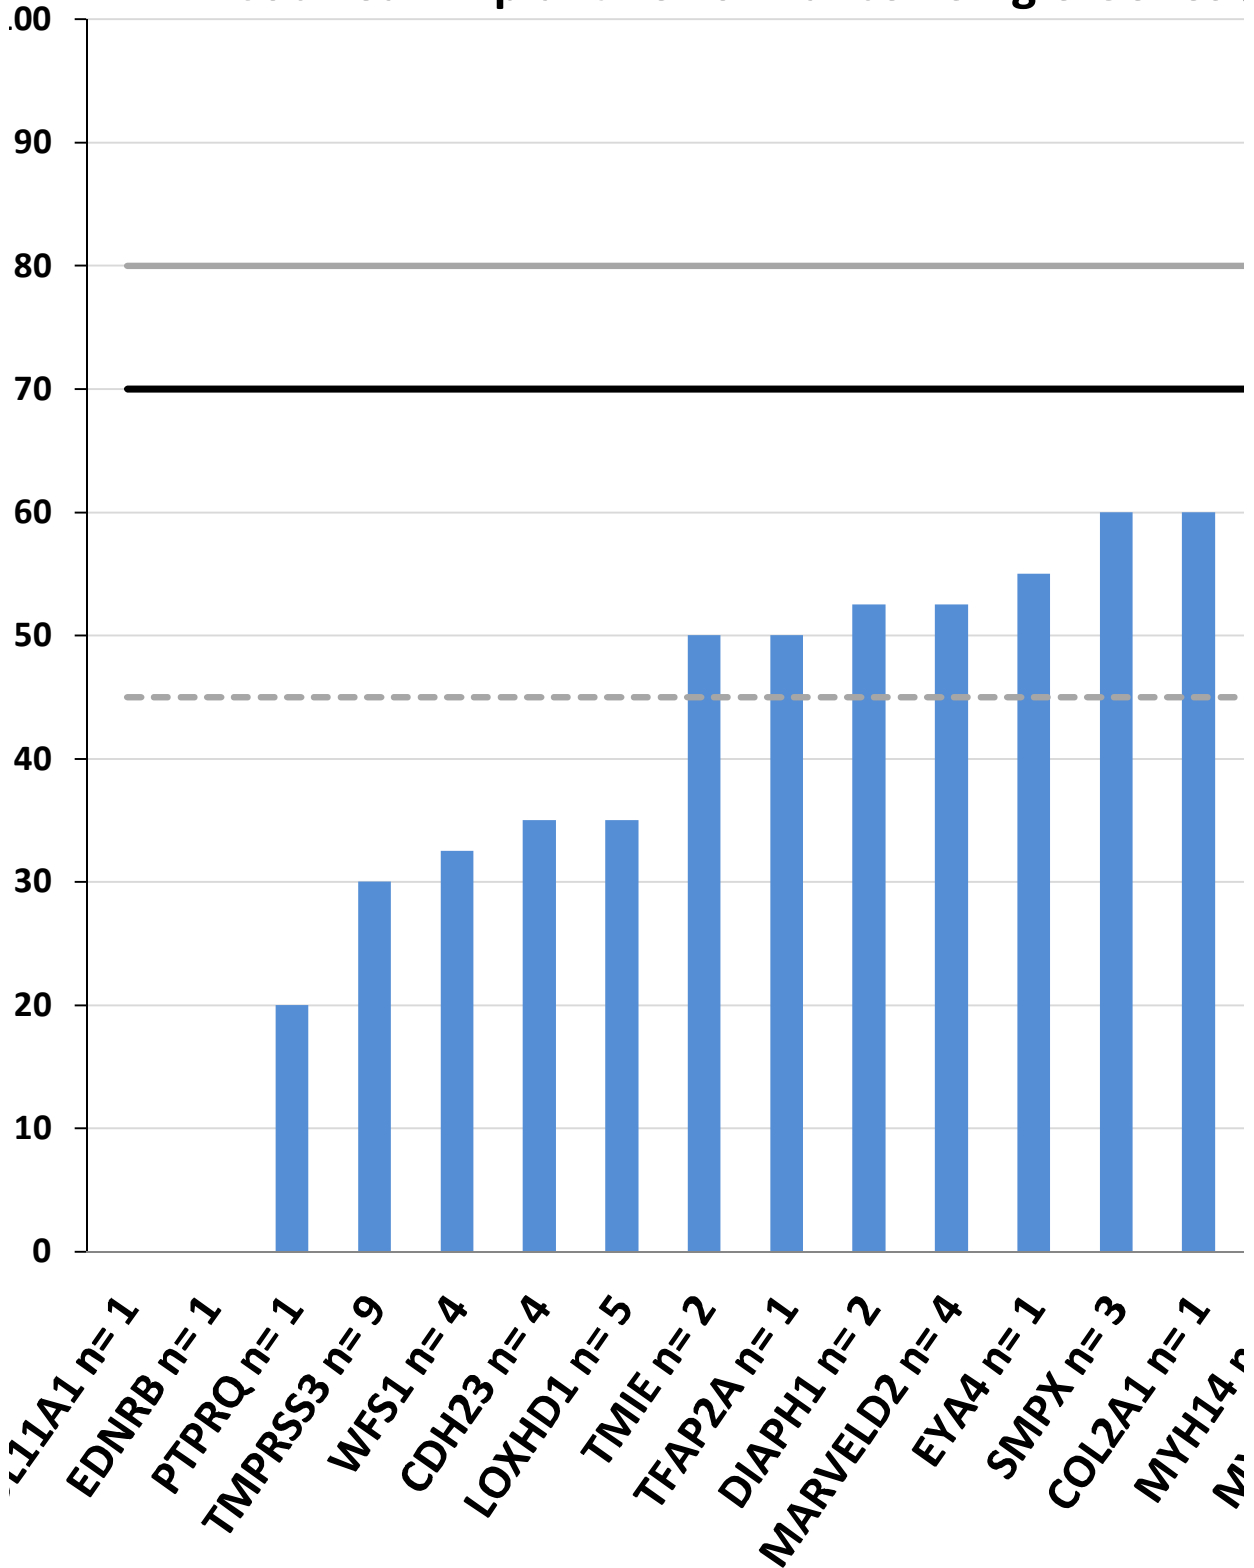

## Cochlear Implant Performance - Gene Expression (n=1)

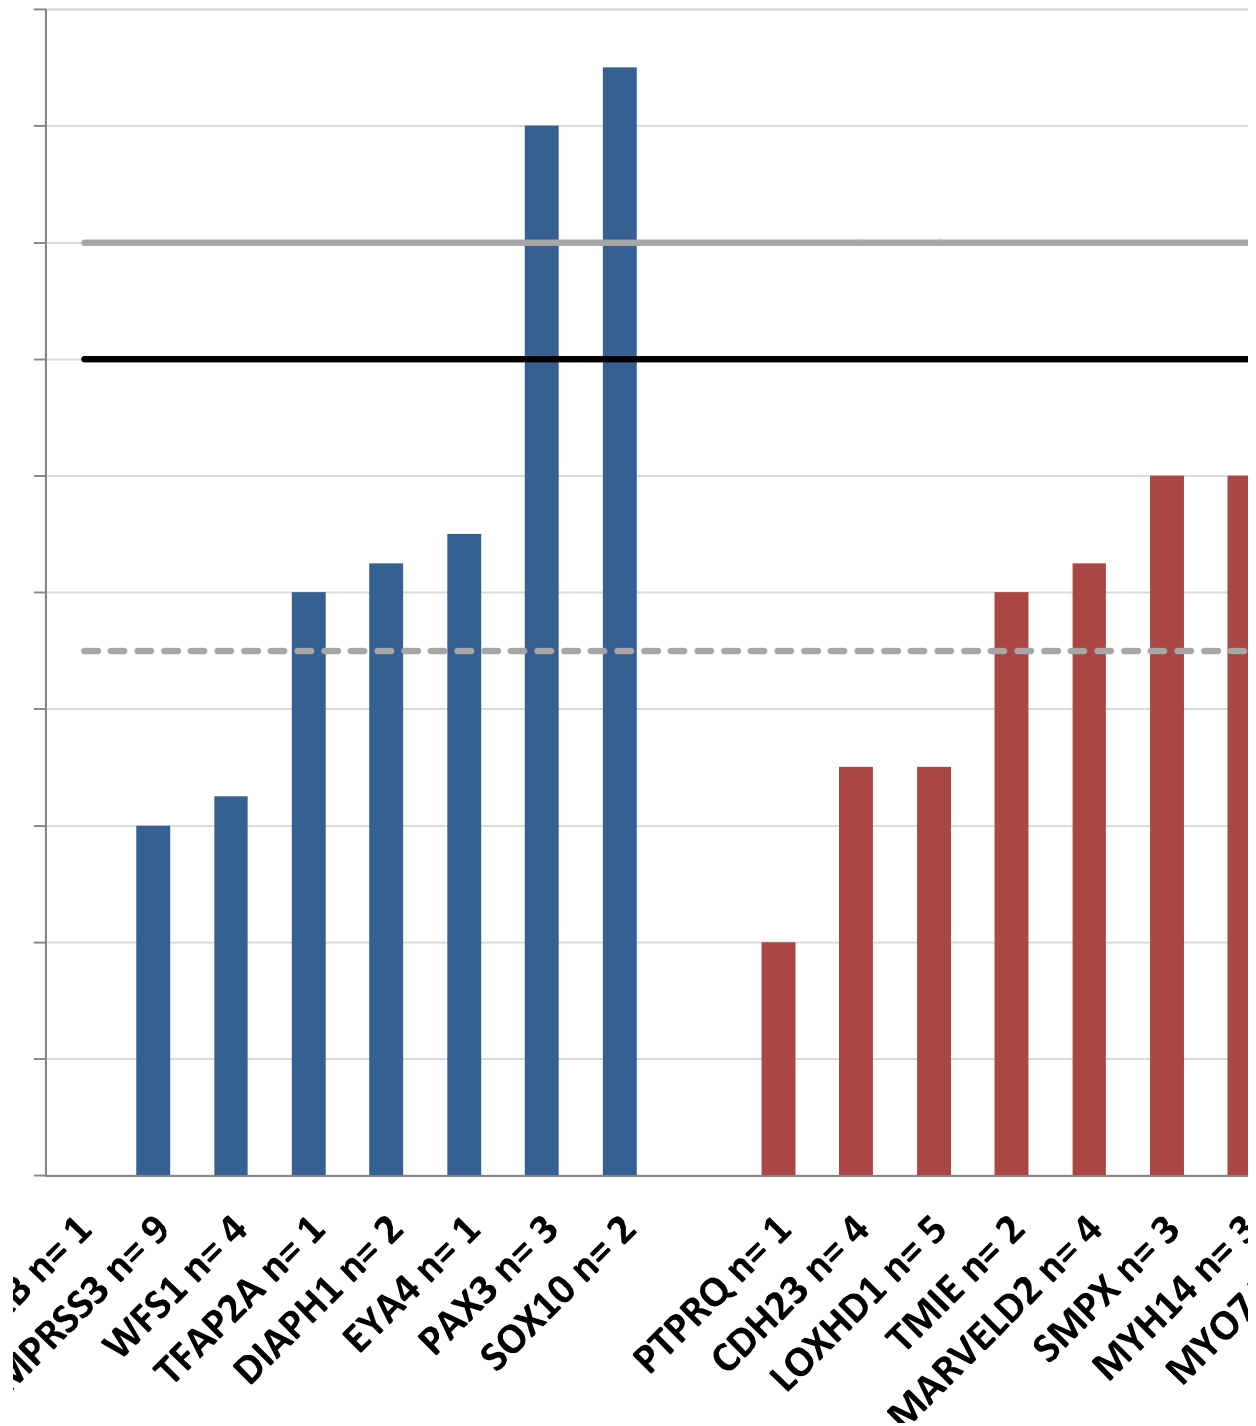

▼

---

**Sir**



(n = 123)

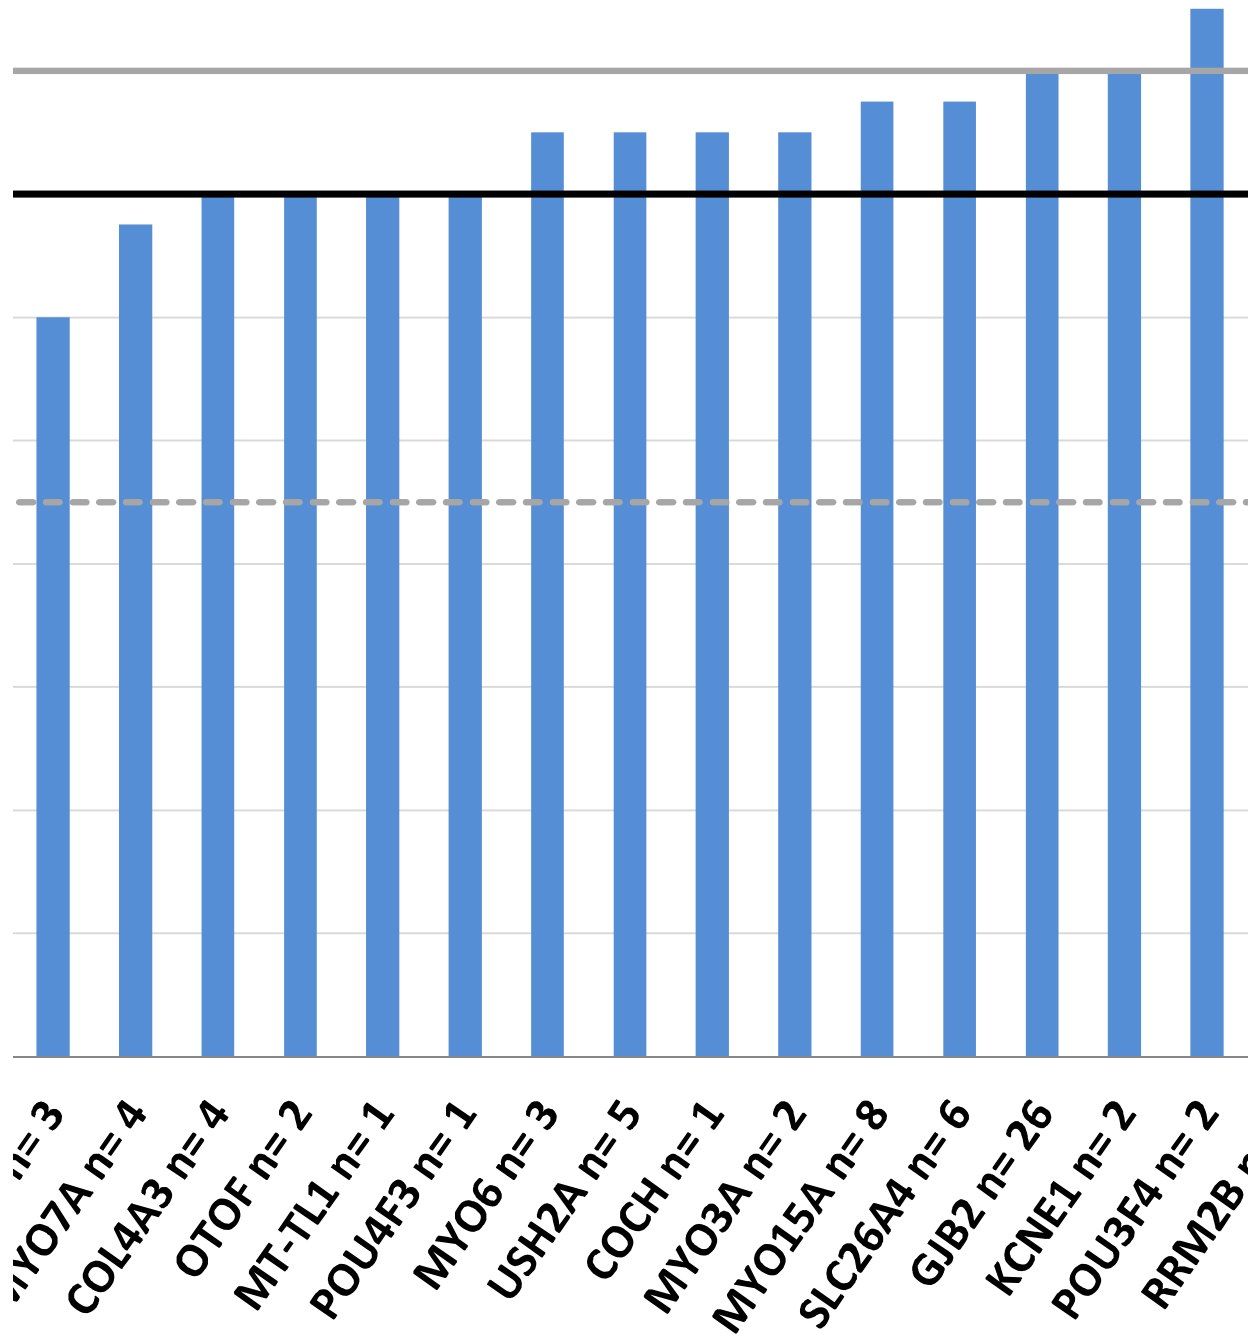

Gene Distribution Performance Ranking

Single Gene Distribution - Performance Ranking

23)

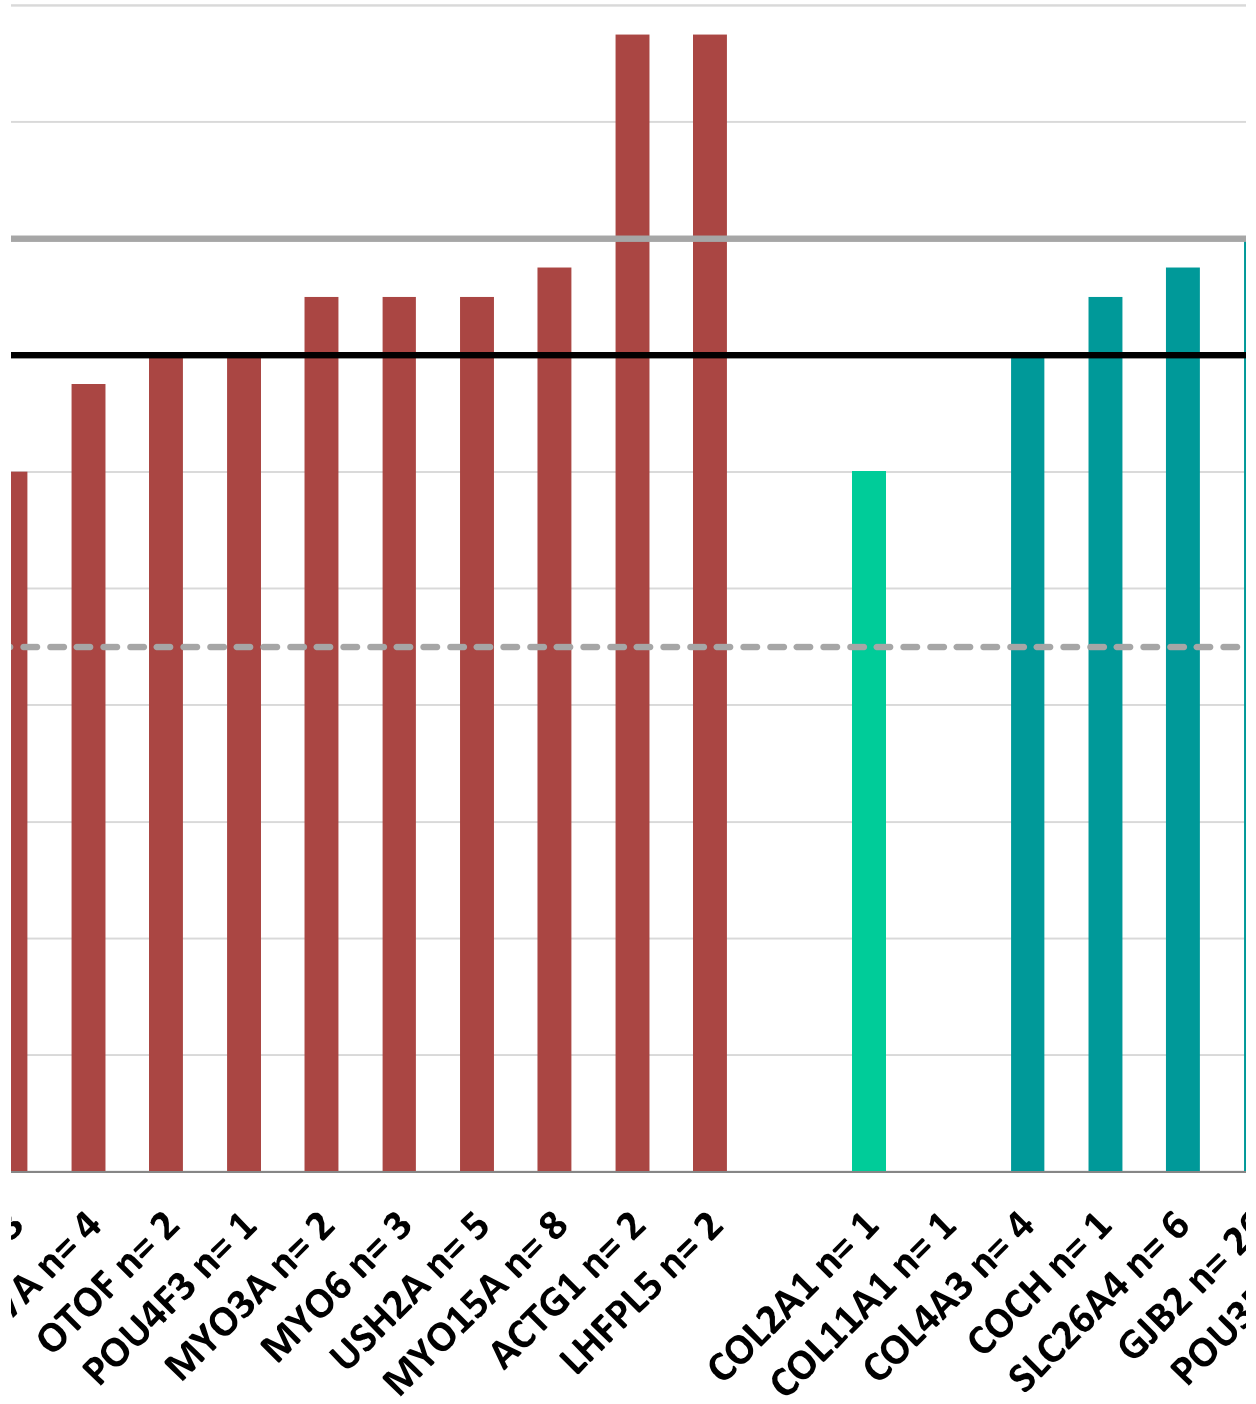

## Single Gene Distribution - Gene Expression Groups

---





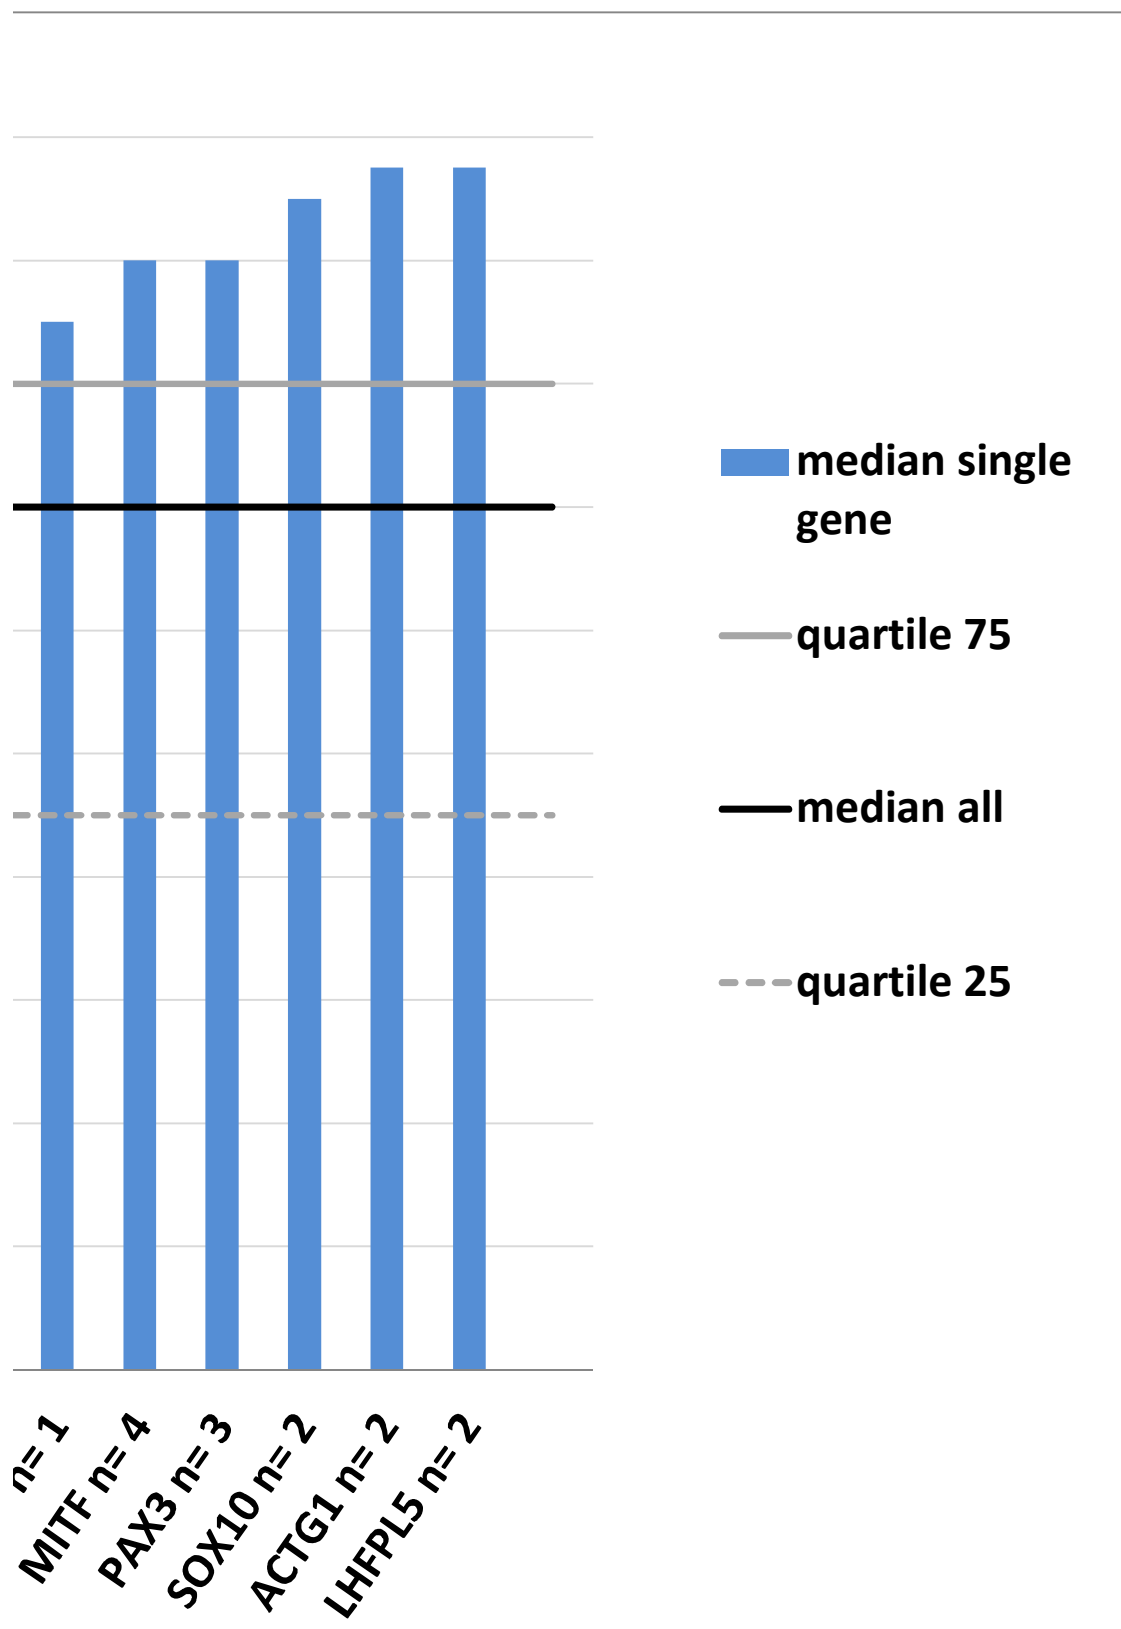

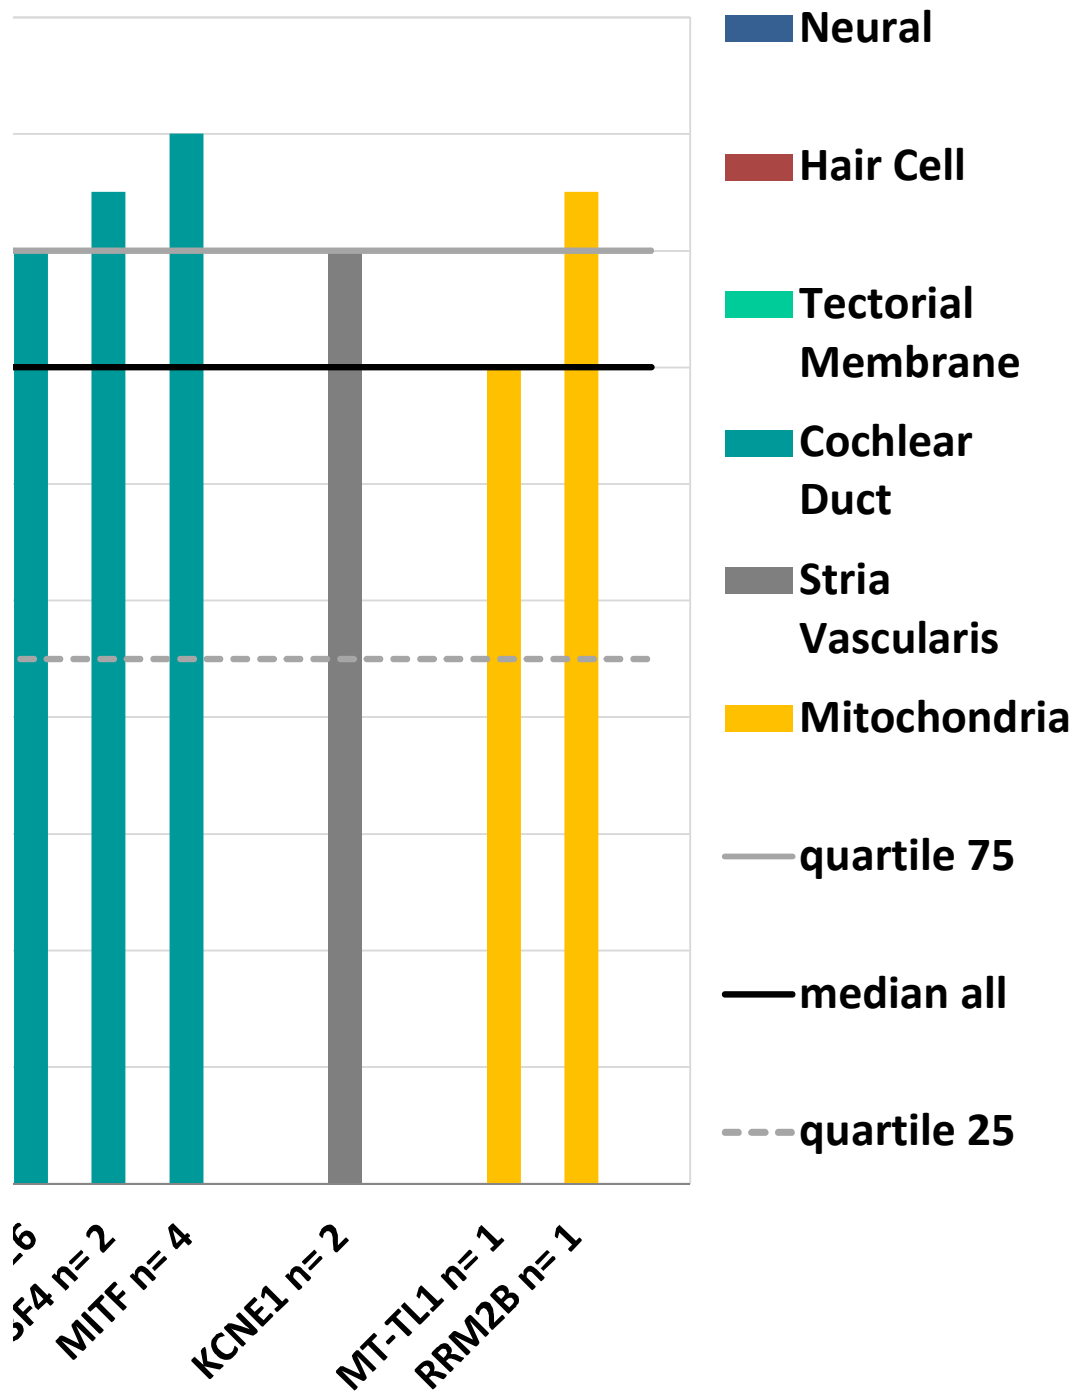

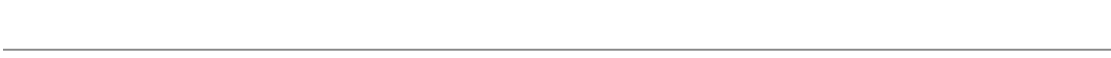

|                  |                        |                  | Median 65<br>both sides |
|------------------|------------------------|------------------|-------------------------|
| gene cat.        | Neural (23)            | Neural           | 45                      |
|                  | Hair Cell (51)         | HC               | 70                      |
|                  | TM and CD (45)         | Structural       | 80                      |
|                  | Stria Vascularis (2)   | SV               | 80                      |
|                  | Mitochondrial (2)      | Mito             | 77.5                    |
| Inheritance      | AR (44)                | AR               | 70                      |
|                  | AD (19)                | AD               | 70                      |
|                  | Sporadic (57)          | sporadic         | 75                      |
|                  | X-linked (3)           | x-linked         | 57.5                    |
| impl age (IA)    | 0-2 (31)               | 0-2              | 80                      |
|                  | 3-6 (14)               | 3-6              | 80                      |
|                  | 7-19 (21)              | 7-19             | 55                      |
|                  | 20-59 (45)             | 20-59            | 55                      |
|                  | > 60 (12)              | > 60             | 62.5                    |
| onset (O)        | Congenital (63)        | congenital       | 80                      |
|                  | Pre-/Peri-lingual (20) | peri-lingual     | 65                      |
|                  | Post-lingual (40)      | post-lingual     | 60                      |
| gap O / IA       | <=2 (33)               | <=2              | 80                      |
|                  | 3-5 (14)               | 3-5              | 80                      |
|                  | 6-10 (8)               | 6-10             | 60                      |
|                  | >10 (68)               | >10              | 55                      |
| hearing loss     | severe (6)             | severe           | 42.5                    |
|                  | profound (24)          | profound         | 55                      |
|                  | complete (93)          | complete         | 70                      |
| laterality       | unilateral (4)         | unilateral       | 0                       |
|                  | asymmetric (2)         | asymmetric       | 62.5                    |
|                  | bilateral sym. (117)   | bilateral sym.   | 70                      |
| sequence of impl | first ear (61)         | <b>first ear</b> | 60                      |
|                  | second ear (32)        | second ear       | 67.5                    |
|                  | simultaneous (30)      | simultaneous     | 80                      |

**first ear = first ear of 2 implants + single ea**

|        | first ear | single ears |
|--------|-----------|-------------|
| median | 72.5      | 55          |
| n      | 32        | 29          |

| number | sum           | total median | statistics |           |
|--------|---------------|--------------|------------|-----------|
| 23     |               | 70           | 0.014      | <0.05*    |
| 51     |               | 70           | n.s.       |           |
| 45     |               | 70           | n.s.       |           |
| 2      |               | 70           | n.s.       |           |
| 2      | 123           | 70           | n.s.       |           |
|        |               | 70           |            |           |
| 44     |               | 70           | n.s.       |           |
| 19     |               | 70           | n.s.       |           |
| 57     | 120           | 70           | n.s.       |           |
| 3      | 123           | 70           | n.s.       |           |
|        |               | 70           |            |           |
| 31     |               | 70           | 0.000183   | <0.001*** |
| 14     |               | 70           | n.s.       |           |
| 21     |               | 70           | n.s.       |           |
| 45     |               | 70           | n.s.       |           |
| 12     | 123           | 70           | n.s.       |           |
|        |               | 70           |            |           |
| 63     |               | 70           | 0.008      | <0.01**   |
| 20     |               | 70           | n.s.       |           |
| 40     | 123           | 70           | 0.023      | <0.05*    |
|        |               | 70           |            |           |
| 33     |               | 70           | 0.002      | <0.01**   |
| 14     |               | 70           | n.s.       |           |
| 8      |               | 70           | n.s.       |           |
| 68     | 123           | 70           | 0.023      | <0.05*    |
|        |               | 70           |            |           |
| 6      | (1 ear WHO 3) | 70           | n.s.       |           |
| 24     |               | 70           | n.s.       |           |
| 93     | 123           | 70           | n.s.       |           |
|        |               | 70           |            |           |
| 4      |               | 70           | n.s.       | 0.053     |
| 2      |               | 70           | n.s.       |           |
| 117    | 123           | 70           | n.s.       |           |
|        |               | 70           |            |           |
| 61     |               | 70           | n.s.       |           |
| 32     |               | 70           | n.s.       |           |
| 30     | 123           | 70           | 0.032      | <0.05*    |

Speech discrimination in quiet (%)

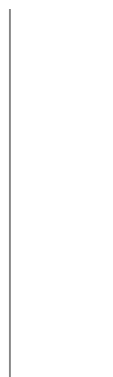

median total (n=123)

in brackets: number (n)

## Cochlear Implant Performance Distribution - Genetic

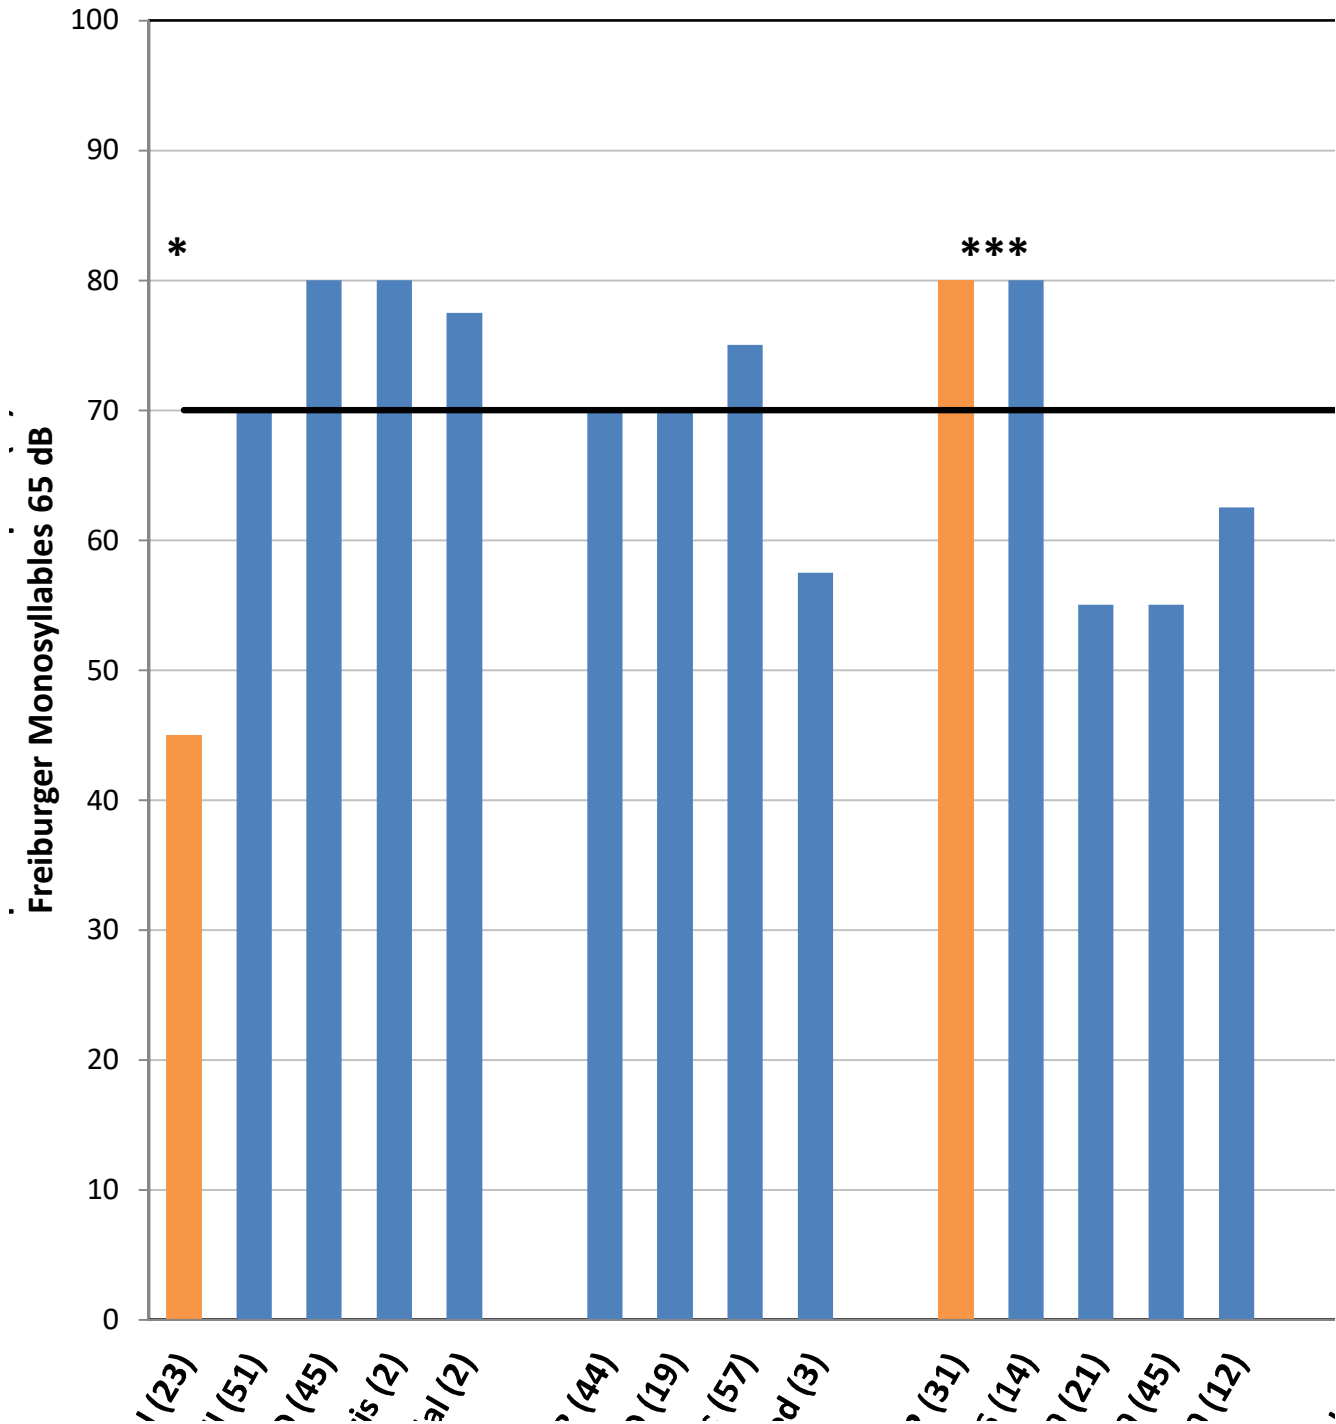



Neural  
Hair Cell  
TM and CD  
Stria Vasculan  
Mitochondri

Gene  
Expression

AR  
AD  
Sporadic  
X-link

Inheritance  
(Family History)

0-2  
3-6  
7-19  
20-59  
> 60

Age at  
Implantation

Congenita  
Pre-/P-

H

## and Clinical Parameters (n=123)

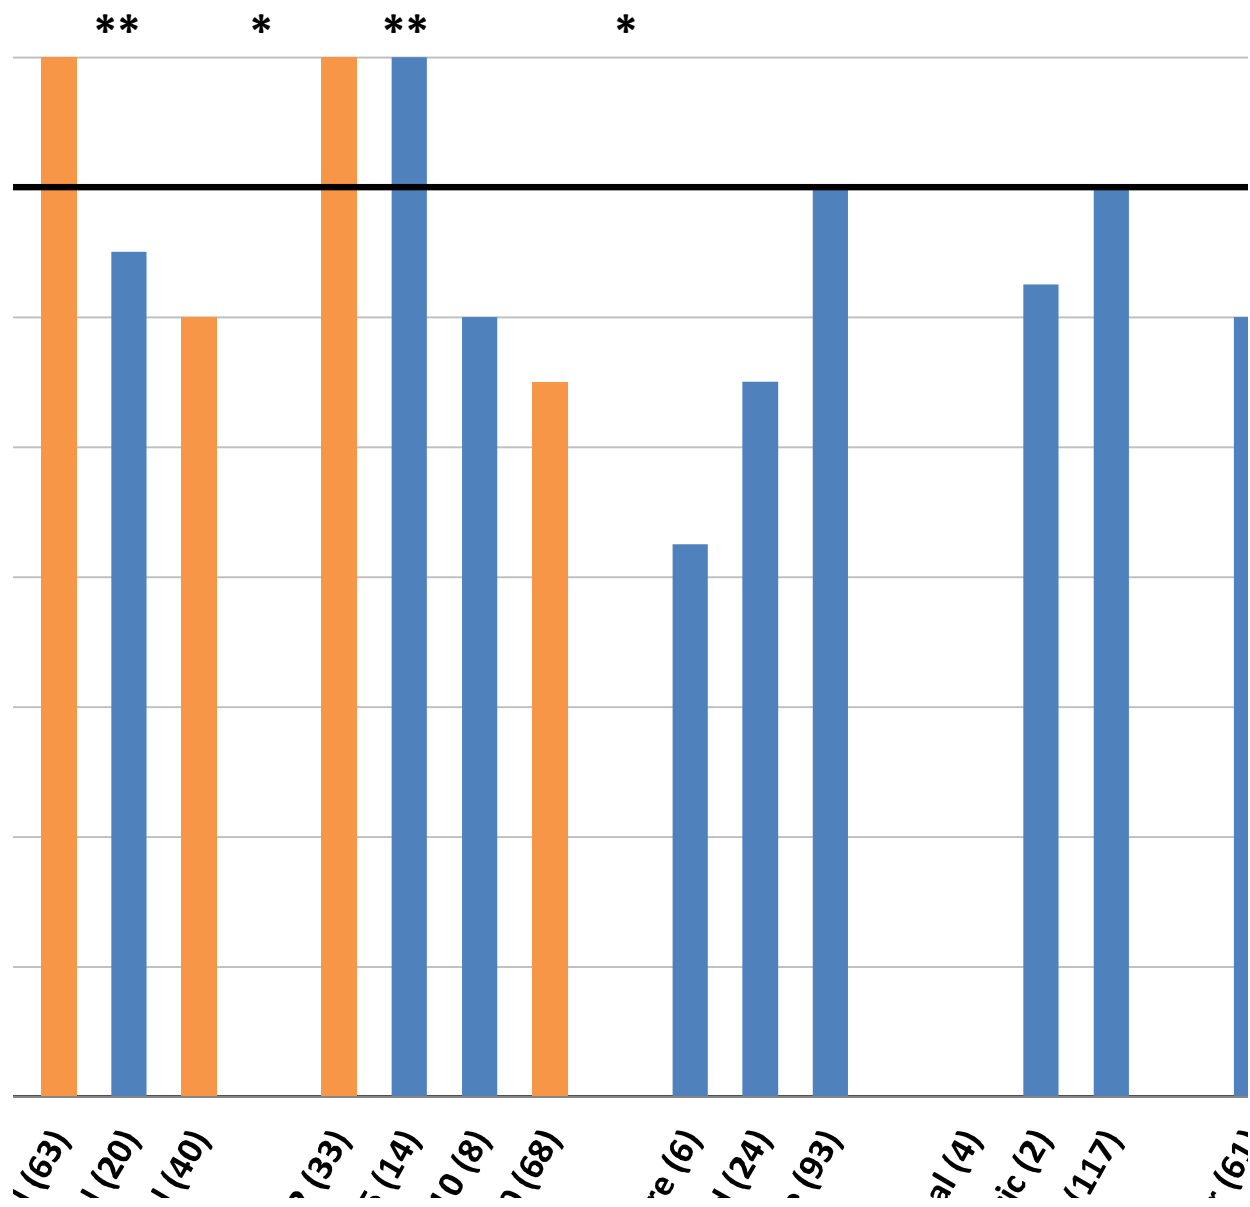

Pre-lingual  
Post-lingual

≤2  
3-5  
6-10  
>10

severe  
profound  
complete

unilateral  
asymmetrical  
bilateral sym.

first ear  
second ear

Onset of hearing loss (HL)  
Delay (years) HL-Onset - Implantation  
Grades of Hearing loss  
Laterality of hearing loss  
Sequence of hearing loss

---

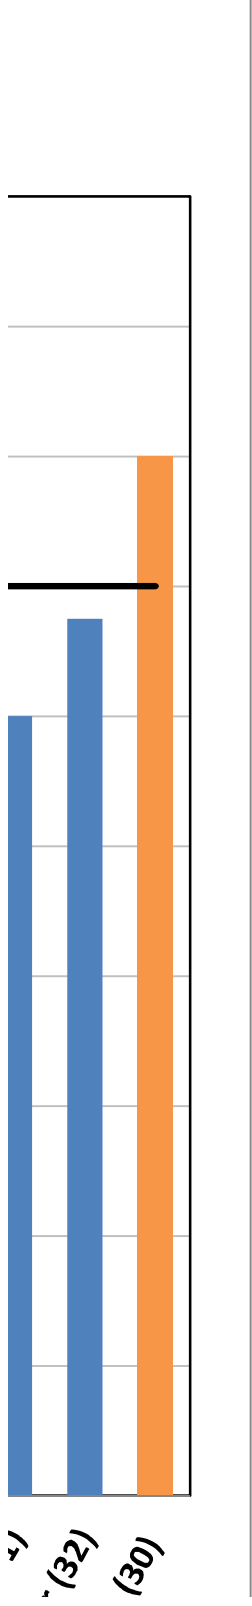

mid ear  
simultaneous

sequence of  
plantation

SDC 3 Figure

| Gen      | Anzahl Ohren | Genes         |    |
|----------|--------------|---------------|----|
| COL11A1  | 1            | COL11A1 n= 1  | 1  |
| EDNRB    | 1            | EDNRB n= 1    | 1  |
| PTPRQ    | 1            | PTPRQ n= 1    | 1  |
| TMPRSS3  | 9            | TMPRSS3 n= 9  | 9  |
| WFS1     | 4            | WFS1 n= 4     | 4  |
| CDH23    | 4            | CDH23 n= 4    | 4  |
| LOXHD1   | 5            | LOXHD1 n= 5   | 5  |
| TMIE     | 2            | TMIE n= 2     | 2  |
| TFAP2A   | 1            | TFAP2A n= 1   | 1  |
| DIAPH1   | 2            | DIAPH1 n= 2   | 2  |
| MARVELD2 | 4            | MARVELD2 n= 4 | 4  |
| EYA4     | 1            | EYA4 n= 1     | 1  |
| SMPX     | 3            | SMPX n= 3     | 3  |
| COL2A1   | 1            | COL2A1 n= 1   | 1  |
| MYH14    | 3            | MYH14 n= 3    | 3  |
| MYO7A    | 4            | MYO7A n= 4    | 4  |
| COL4A3   | 4            | COL4A3 n= 4   | 4  |
| OTOF     | 2            | OTOF n= 2     | 2  |
| MT-TL1   | 1            | MT-TL1 n= 1   | 1  |
| POU4F3   | 1            | POU4F3 n= 1   | 1  |
| MYO6     | 3            | MYO6 n= 3     | 3  |
| USH2A    | 5            | USH2A n= 5    | 5  |
| COCH     | 1            | COCH n= 1     | 1  |
| MYO3A    | 2            | MYO3A n= 2    | 2  |
| MYO15A   | 8            | MYO15A n= 8   | 8  |
| SLC26A4  | 6            | SLC26A4 n= 6  | 6  |
| GJB2     | 26           | GJB2 n= 26    | 26 |
| KCNE1    | 2            | KCNE1 n= 2    | 2  |
| POU3F4   | 2            | POU3F4 n= 2   | 2  |
| RRM2B    | 1            | RRM2B n= 1    | 1  |
| MITF     | 4            | MITF n= 4     | 4  |
| PAX3     | 3            | PAX3 n= 3     | 3  |
| SOX10    | 2            | SOX10 n= 2    | 2  |
| ACTG1    | 2            | ACTG1 n= 2    | 2  |
| LHFPL5   | 2            | LHFPL5 n= 2   | 2  |

SDC fig.3

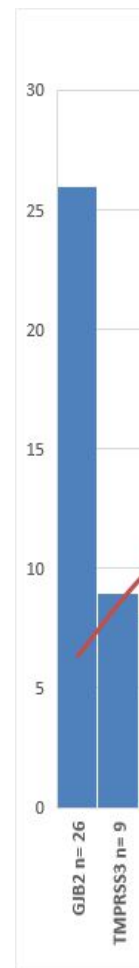

### Gene Distribution Implanted Ears (n=123)

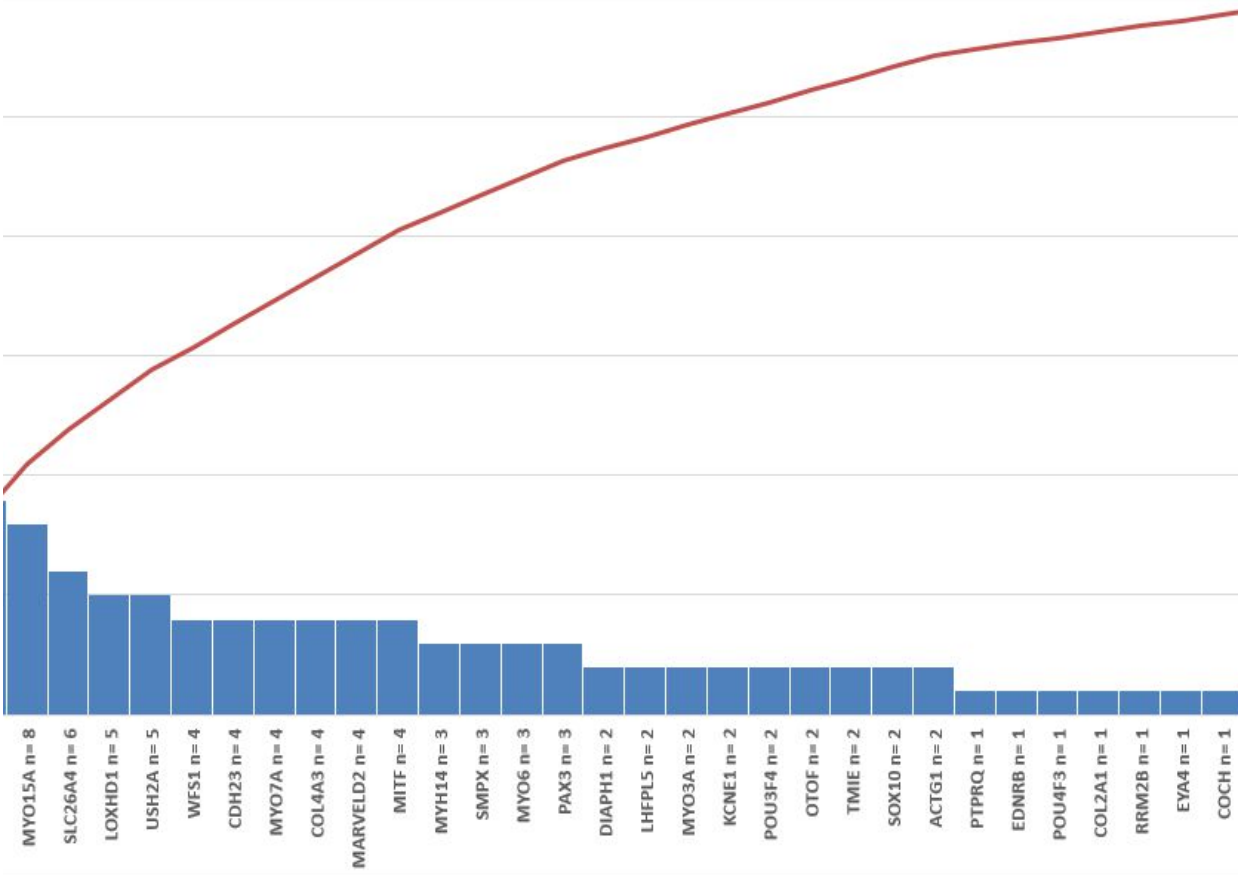

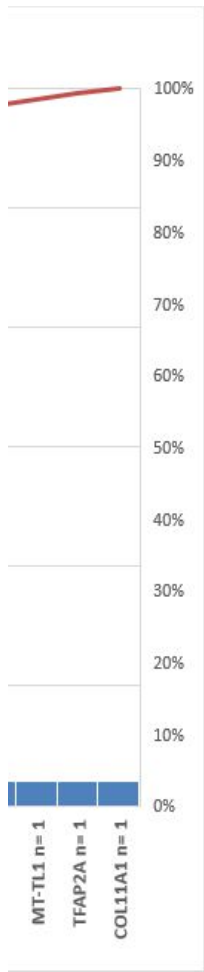



SDC 4 Figure

| Genes        | 80 dB<br>median single gene |
|--------------|-----------------------------|
| EDNRB n= 1   | 15                          |
| PTPRQ n= 1   | 30                          |
| CDH23 n= 4   | 30                          |
| COL11A1 n= : | 50                          |
| TMPRSS3 n=   | 50                          |
| MARVELD2 n   | 52.5                        |
| SLC26A4 n= 4 | 57.5                        |
| OTOF n= 2    | 60                          |
| WFS1 n= 4    | 70                          |
| POU4F3 n= 1  | 70                          |
| TFAP2A n= 2  | 72.5                        |
| SMPX n= 3    | 75                          |
| LOXHD1 n= 5  | 80                          |
| DIAPH1 n= 2  | 80                          |
| EYA4 n= 1    | 80                          |
| MYH14 n= 2   | 80                          |
| COL4A3 n= 4  | 85                          |
| MYO6 n= 3    | 85                          |
| GJB2 n= 26   | 85                          |
| TMIE n= 2    | 90                          |
| COL2A1 n= 1  | 90                          |
| MYO7A n= 4   | 90                          |
| MT-TL1 n= 1  | 90                          |
| USH2A n= 5   | 90                          |
| COCH n= 1    | 90                          |
| MYO3A n= 2   | 90                          |
| MYO15A n= 8  | 90                          |
| PAX3 n= 3    | 95                          |
| SOX10 n= 2   | 95                          |
| ACTG1 n= 2   | 95                          |
| LHFPL5 n= 2  | 95                          |
| POU3F4 n= 2  | 100                         |
| RRM2B n= 1   | 100                         |

SDC 4A Figure

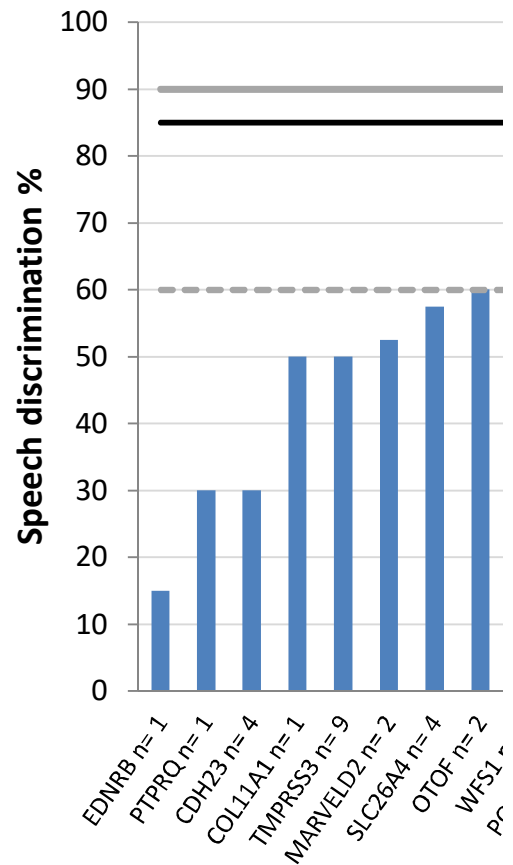

**fig. Suppl. 1B**

| Gen          | median 80 dB |      | Str     | SH      | TM   |
|--------------|--------------|------|---------|---------|------|
|              | Neural       | HC   | Stru-TM | Stru-CD | SV   |
| EDNRB n= 1   | EDNRB        | 15   |         |         |      |
| TMPRSS3 n=   | TMPRSS3      | 50   |         |         |      |
| TFAP2A n= 2  | TFAP2A       | 72.5 |         |         |      |
| WFS1 n= 4    | WFS1         | 70   |         |         |      |
| DIAPH1 n= 2  | DIAPH1       | 80   |         |         |      |
| EYA4 n= 1    | EYA4         | 80   |         |         |      |
| PAX3 n= 3    | PAX3         | 95   |         |         |      |
| SOX10 n= 2   | SOX10        | 95   |         |         |      |
| PTPRQ n= 1   | PTPRQ        |      | 30      |         |      |
| CDH23 n= 4   | CDH23        |      | 30      |         |      |
| MARVELD2 n   | MARVELD2     |      | 52.5    |         |      |
| OTOF n= 2    | OTOF         |      | 60      |         |      |
| POU4F3 n= 1  | POU4F3       |      | 70      |         |      |
| SMPX n= 3    | SMPX         |      | 75      |         |      |
| LOXHD1 n= 5  | LOXHD1       |      | 80      |         |      |
| MYH14 n= 2   | MYH14        |      | 80      |         |      |
| MYO6 n= 3    | MYO6         |      | 85      |         |      |
| TMIE n= 2    | TMIE         |      | 90      |         |      |
| MYO7A n= 4   | MYO7A        |      | 90      |         |      |
| MYO3A n= 2   | MYO3A        |      | 90      |         |      |
| USH2A n= 5   | USH2A        |      | 90      |         |      |
| MYO15A n= 8  | MYO15A       |      | 90      |         |      |
| ACTG1 n= 2   | ACTG1        |      | 95      |         |      |
| LHFPL5 n= 2  | LHFPL5       |      | 95      |         |      |
| COL2A1 n= 1  | COL2A1       |      |         | 90      |      |
| COL11A1 n=   | COL11A1      |      |         |         | 50   |
| SLC26A4 n= 4 | SLC26A4      |      |         |         | 57.5 |
| COL4A3 n= 4  | COL4A3       |      |         |         | 85   |
| GJB2 n= 26   | GJB2         |      |         |         | 85   |
| COCH n= 1    | COCH         |      |         |         | 90   |
| POU3F4 n= 2  | POU3F4       |      |         |         | 100  |
| MT-TL1 n= 1  | MT-TL1       |      |         |         |      |
| RRM2B n= 1   | RRM2B        |      |         |         |      |

**Impl. Age**

6-17 y.

18+ y.

| Gen      | pediatric (n=16) | adult (n=41)                   |
|----------|------------------|--------------------------------|
| ACTG1    |                  | 1                              |
| CDH23    | 1                | 1                              |
| COCH     |                  | 1                              |
| COL11A1  |                  | 1                              |
| COL2A1   |                  | 1                              |
| COL4A3   |                  | 3                              |
| DIAPH1   |                  | 1                              |
| EDNRB    | 1                |                                |
| EYA4     |                  | 1                              |
| GJB2     | 6                | 1 <b>Pat. 297: ped.+ adult</b> |
| LHFPL5   | 1                |                                |
| LOXHD1   |                  | 3                              |
| MARVELD2 | 1                |                                |
| MT-TL1   |                  | 1                              |
| MYH14    | 2                |                                |
| MYO15A   | 2                | 2                              |
| MYO3A    |                  | 1                              |
| MYO6     |                  | 2                              |
| MYO7A    |                  | 2                              |
| PAX3     | 1                |                                |
| POU4F3   |                  | 1                              |
| PTPRQ    |                  | 1                              |
| RRM2B    |                  | 1                              |
| SLC26A4  | 1                | 1                              |
| SMPX     |                  | 2                              |
| SOX10    |                  | 1                              |
| TFAP2A   |                  | 1                              |
| TMPRSS3  |                  | 5                              |
| USH2A    |                  | 3                              |
| WFS1     |                  | 3                              |

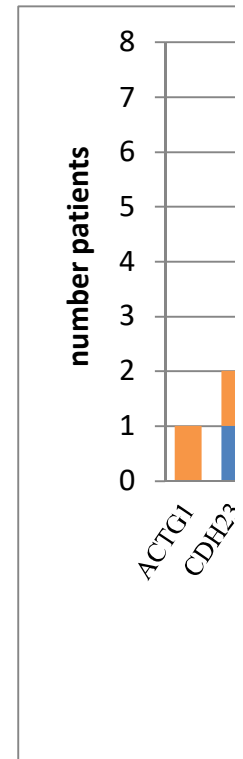

## Speech in Quiet - Monosyllables 80 dB (n = 113)

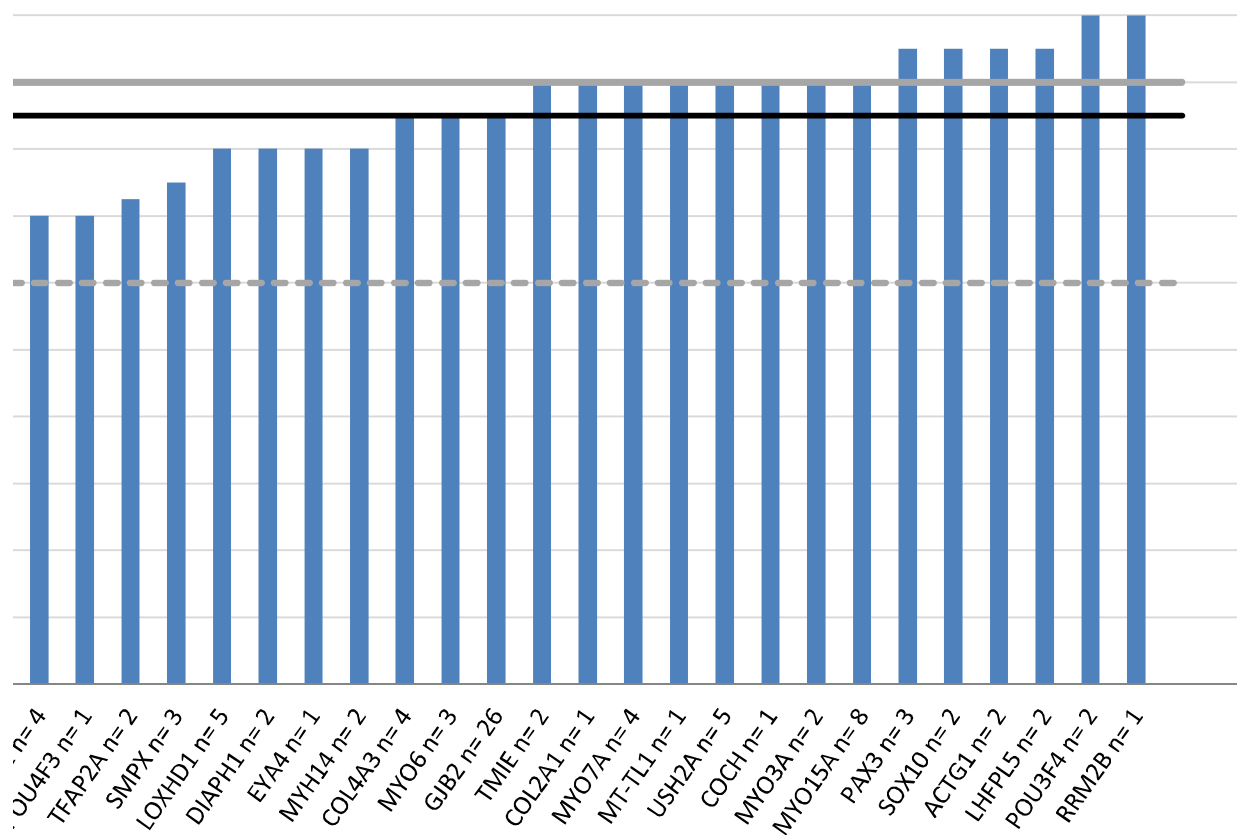

Gene Distribution - Performance Ranking



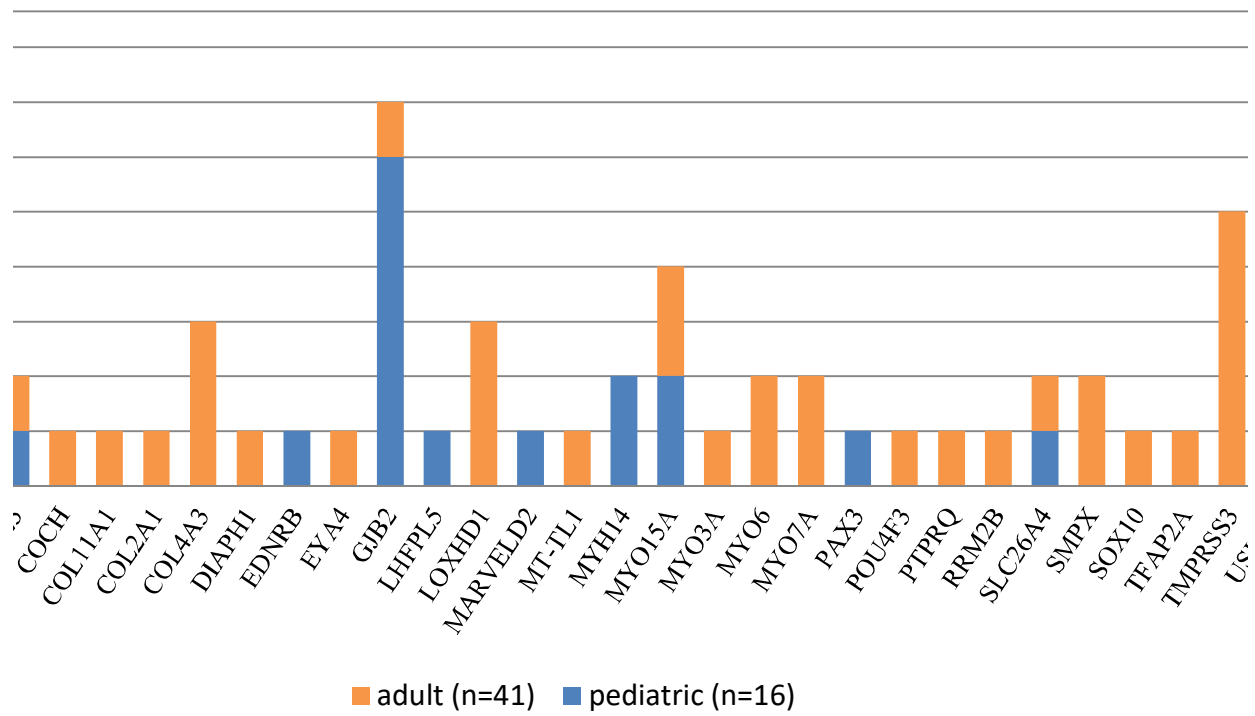

■ median single  
gene

— quartile 75

— median all

- - - quartile 25

speech in quiet - monosyllables 80 dB (n = 113)

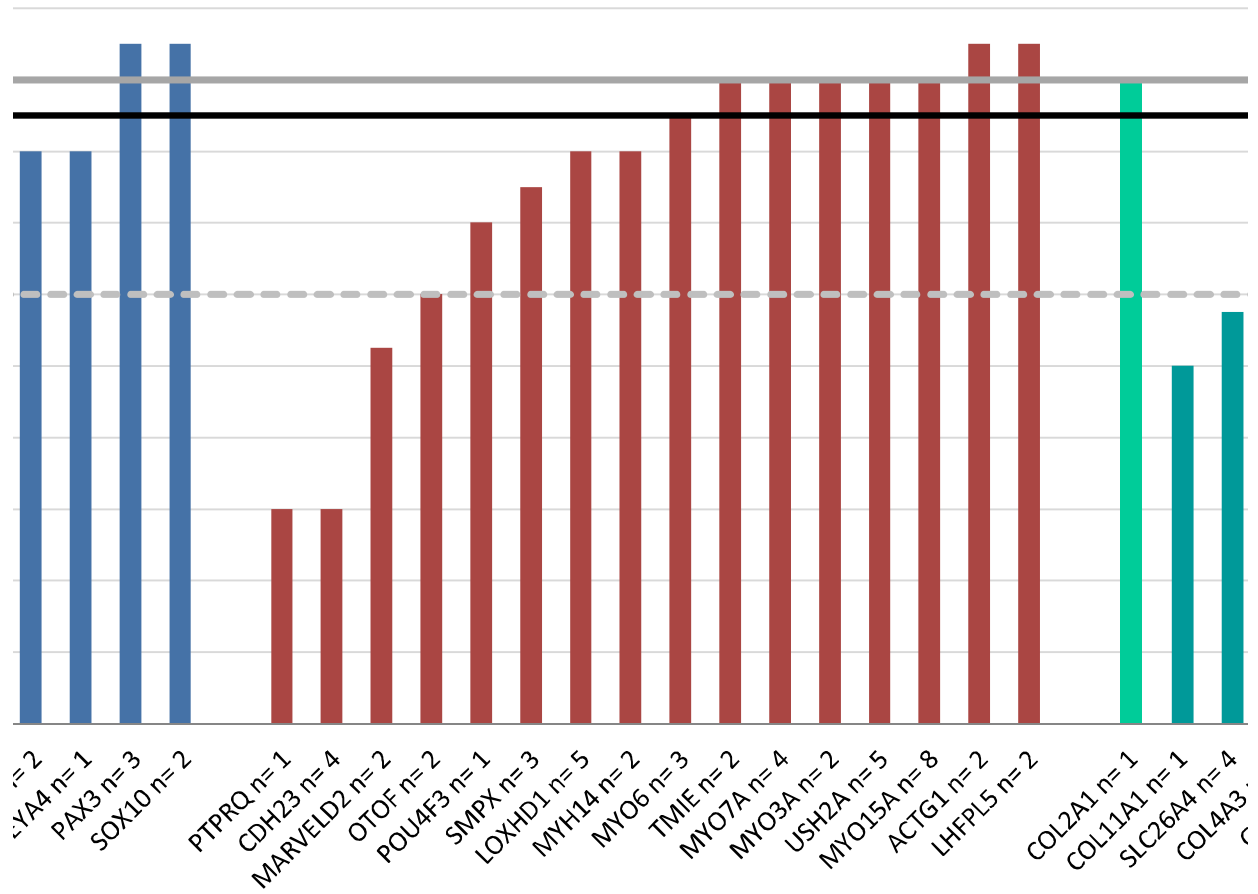

Gene Distribution - Expression



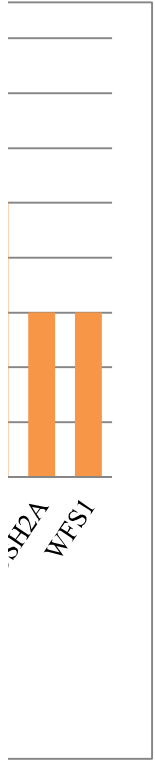



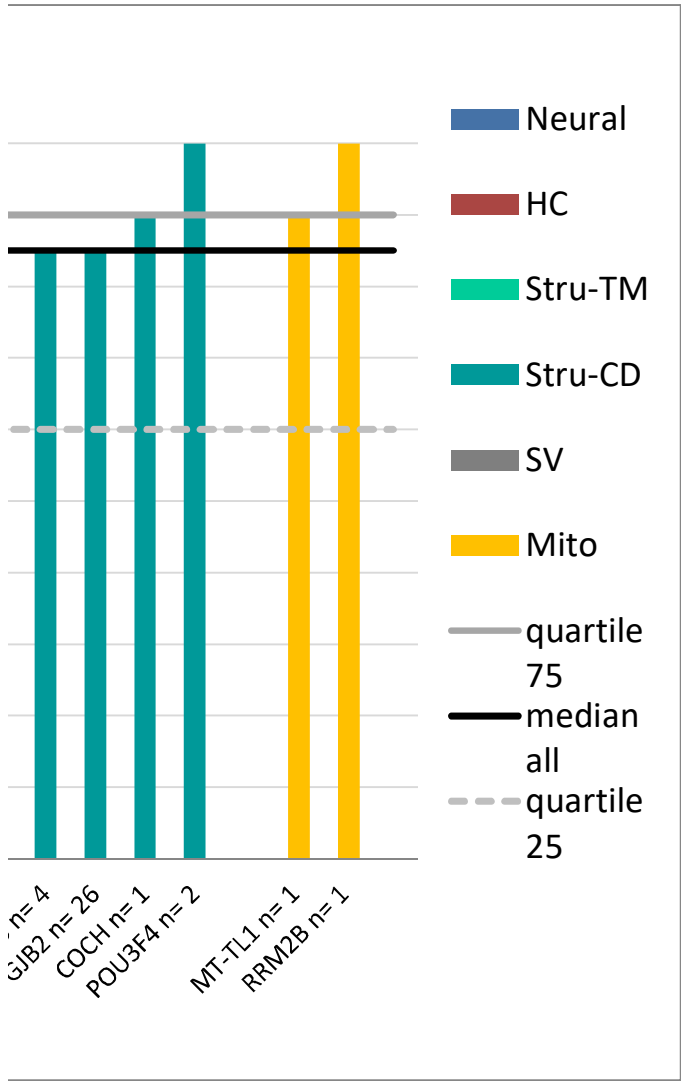

## SPSS 27: exploratory data analysis

| Case Processing Summary |                |       |         |               |         |
|-------------------------|----------------|-------|---------|---------------|---------|
|                         | group          | Valid |         | Cases Missing |         |
|                         |                | N     | Percent | N             | Percent |
| Fb_all                  | age_gt6        | 78    | 100.0%  | 0             | 0.0%    |
|                         | age0_6         | 45    | 100.0%  | 0             | 0.0%    |
|                         | congenital     | 47    | 100.0%  | 0             | 0.0%    |
|                         | pp_lingual     | 76    | 100.0%  | 0             | 0.0%    |
|                         | gap_gt5        | 76    | 100.0%  | 0             | 0.0%    |
|                         | gap0_5         | 47    | 100.0%  | 0             | 0.0%    |
|                         | neural_genes   | 23    | 100.0%  | 0             | 0.0%    |
|                         | other_genes    | 100   | 100.0%  | 0             | 0.0%    |
|                         | first_sec_ears | 93    | 100.0%  | 0             | 0.0%    |
|                         | simult_ears    | 30    | 100.0%  | 0             | 0.0%    |

| Tests of Normality <sup>a</sup> |                     | all groups besides neural genes show significant differen |     |              |           |
|---------------------------------|---------------------|-----------------------------------------------------------|-----|--------------|-----------|
|                                 | group               | Kolmogorov-Smirnov <sup>b</sup>                           |     |              | Statistic |
|                                 |                     | Statistic                                                 | df  | Sig.         |           |
| Fb_all                          | age_gt6             | 0.111                                                     | 78  | 0.019        | 0.941     |
|                                 | age0_6              | 0.263                                                     | 45  | 0.000        | 0.811     |
|                                 | congenital          | 0.184                                                     | 47  | 0.000        | 0.926     |
|                                 | pp_lingual          | 0.144                                                     | 76  | 0.000        | 0.915     |
|                                 | gap_gt5             | 0.111                                                     | 76  | 0.021        | 0.943     |
|                                 | gap0_5              | 0.251                                                     | 47  | 0.000        | 0.808     |
|                                 | <b>neural_genes</b> | 0.137                                                     | 23  | <b>,200*</b> | 0.916     |
|                                 | other_genes         | 0.176                                                     | 100 | 0.000        | 0.909     |
|                                 | first_sec_ears      | 0.129                                                     | 93  | 0.001        | 0.935     |
|                                 | simult_ears         | 0.245                                                     | 30  | 0.000        | 0.792     |

\*. This is a lower bound of the true significance.

a. There are no valid cases for Fb\_all when group = ,000. Statistics cannot be computed for this level.

b. Lilliefors Significance Correction

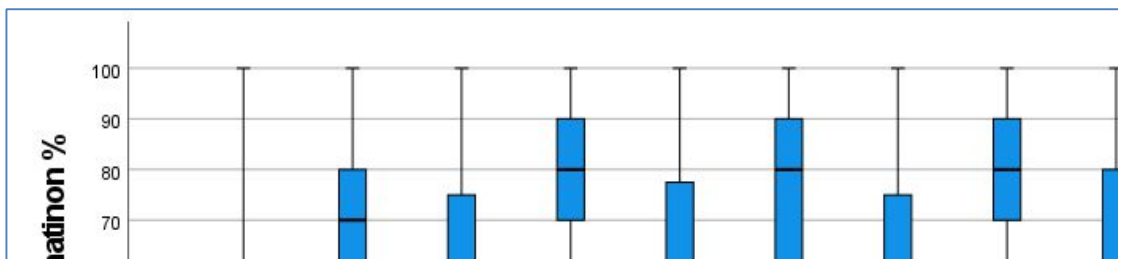

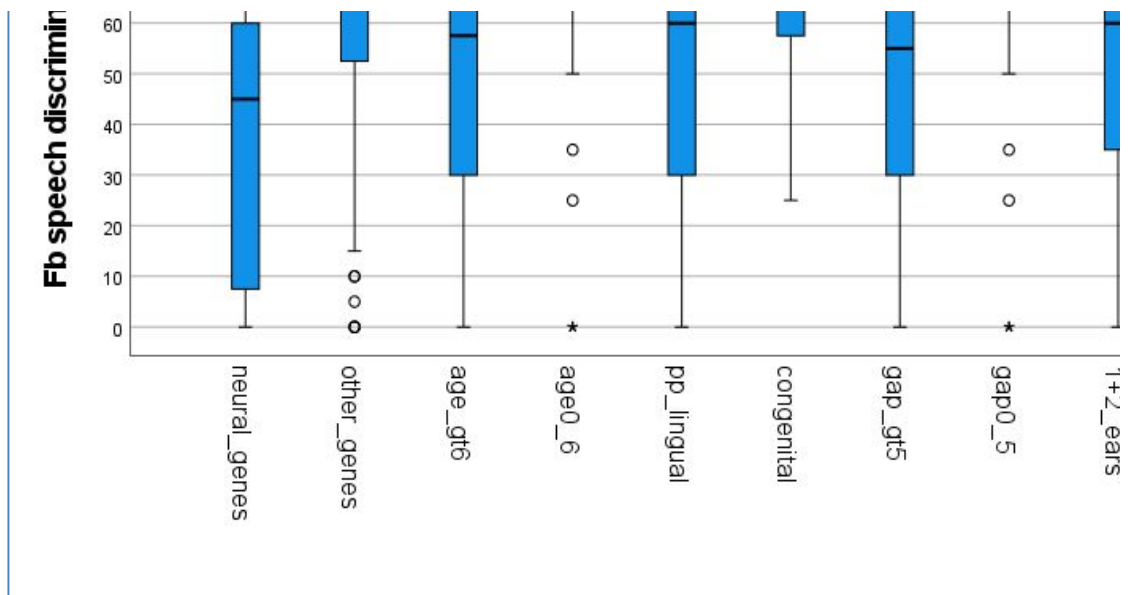

fig. Boxplots:

° outliers (outside of whiskers)  
 \* extreme outliers (>3x interquartile range)  
 box: upper line 75% percentile  
       middle line median  
       lower line 25% percentile  
 whiskers: total length = 1.5x interquartile range





| N   | Total |         |
|-----|-------|---------|
|     |       | Percent |
| 78  |       | 100.0%  |
| 45  |       | 100.0%  |
| 47  |       | 100.0%  |
| 76  |       | 100.0%  |
| 76  |       | 100.0%  |
| 47  |       | 100.0%  |
| 23  |       | 100.0%  |
| 100 |       | 100.0%  |
| 93  |       | 100.0%  |
| 30  |       | 100.0%  |

**ce to normal distribution**

| Shapiro-Wilk | df  | Sig.         |
|--------------|-----|--------------|
|              | 78  | 0.001        |
|              | 45  | 0.000        |
|              | 47  | 0.005        |
|              | 76  | 0.000        |
|              | 76  | 0.002        |
|              | 47  | 0.000        |
|              | 23  | <b>0.054</b> |
|              | 100 | 0.000        |
|              | 93  | 0.000        |
|              | 30  | 0.000        |

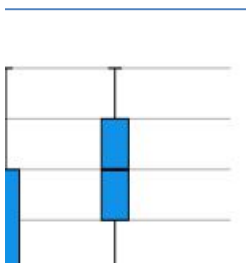

| Descriptives <sup>a</sup> |         |                                  |             |
|---------------------------|---------|----------------------------------|-------------|
| group                     |         |                                  |             |
| Fb_all                    | age_gt6 | Mean                             |             |
|                           |         | 95% Confidence Interval for Mean | Lower Bound |
|                           |         |                                  | Upper Bound |
|                           |         | 5% Trimmed Mean                  |             |
|                           |         | Median                           |             |
|                           |         | Variance                         |             |
|                           |         | Std. Deviation                   |             |
|                           |         | Minimum                          |             |
|                           |         | Maximum                          |             |
|                           |         | Range                            |             |
|                           |         | Interquartile Range              |             |
|                           |         | Skewness                         |             |
|                           |         | Kurtosis                         |             |
| age0_6                    |         | Mean                             |             |
|                           |         | 95% Confidence Interval for Mean | Lower Bound |
|                           |         |                                  | Upper Bound |
|                           |         | 5% Trimmed Mean                  |             |
|                           |         | Median                           |             |
|                           |         | Variance                         |             |
|                           |         | Std. Deviation                   |             |
|                           |         | Minimum                          |             |
|                           |         | Maximum                          |             |
|                           |         | Range                            |             |
|                           |         | Interquartile Range              |             |
|                           |         | Skewness                         |             |
|                           |         | Kurtosis                         |             |
| congenit                  |         | Mean                             |             |
|                           |         | 95% Confidence Interval for Mean | Lower Bound |
|                           |         |                                  | Upper Bound |
|                           |         | 5% Trimmed Mean                  |             |
|                           |         | Median                           |             |
|                           |         | Variance                         |             |
|                           |         | Std. Deviation                   |             |
|                           |         | Minimum                          |             |
|                           |         | Maximum                          |             |
|                           |         | Range                            |             |
|                           |         | Interquartile Range              |             |
|                           |         | Skewness                         |             |
|                           |         | Kurtosis                         |             |



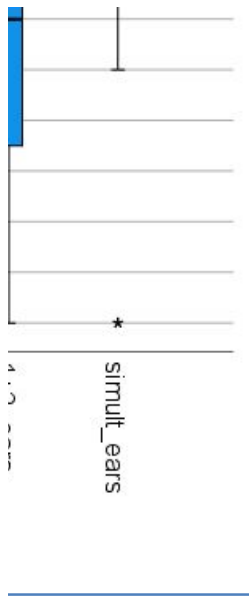

|                                  |                                  |                            |
|----------------------------------|----------------------------------|----------------------------|
| first_se                         | Mean                             |                            |
|                                  | 95% Confidence Interval for Mean | Lower Bound<br>Upper Bound |
|                                  | 5% Trimmed Mean                  |                            |
|                                  | Median                           |                            |
|                                  | Variance                         |                            |
|                                  | Std. Deviation                   |                            |
|                                  | Minimum                          |                            |
|                                  | Maximum                          |                            |
|                                  | Range                            |                            |
|                                  | Interquartile Range              |                            |
|                                  | Skewness                         |                            |
|                                  | Kurtosis                         |                            |
|                                  | gap_gt5                          | Mean                       |
| 95% Confidence Interval for Mean |                                  | Lower Bound<br>Upper Bound |
| 5% Trimmed Mean                  |                                  |                            |
| Median                           |                                  |                            |
| Variance                         |                                  |                            |
| Std. Deviation                   |                                  |                            |
| Minimum                          |                                  |                            |
| Maximum                          |                                  |                            |
| Range                            |                                  |                            |
| Interquartile Range              |                                  |                            |
| Skewness                         |                                  |                            |
| Kurtosis                         |                                  |                            |
| gap0_5                           |                                  | Mean                       |
|                                  | 95% Confidence Interval for Mean | Lower Bound<br>Upper Bound |
|                                  | 5% Trimmed Mean                  |                            |
|                                  | Median                           |                            |
|                                  | Variance                         |                            |
|                                  | Std. Deviation                   |                            |
|                                  | Minimum                          |                            |
|                                  | Maximum                          |                            |
|                                  | Range                            |                            |
|                                  | Interquartile Range              |                            |
|                                  | Skewness                         |                            |
|                                  | Kurtosis                         |                            |
|                                  | neural_g                         | Mean                       |
| 95% Confidence Interval for Mean |                                  | Lower Bound<br>Upper Bound |

---

5% Trimmed Mean

---

Median

---

Variance

---

Std. Deviation

---

Minimum

---

Maximum

---

Range

---

Interquartile Range

---

Skewness

---

Kurtosis

---

other\_ge

---

Mean

---

95% Confidence Interval for Mean

---

Lower Bound

---

Upper Bound

---

5% Trimmed Mean

---

Median

---

Variance

---

Std. Deviation

---

Minimum

---

Maximum

---

Range

---

Interquartile Range

---

Skewness

---

Kurtosis

---

pp\_lingu

---

Mean

---

95% Confidence Interval for Mean

---

Lower Bound

---

Upper Bound

---

5% Trimmed Mean

---

Median

---

Variance

---

Std. Deviation

---

Minimum

---

Maximum

---

Range

---

Interquartile Range

---

Skewness

---

Kurtosis

---

simult\_e

---

Mean

---

95% Confidence Interval for Mean

---

Lower Bound

---

Upper Bound

---

5% Trimmed Mean

---

Median

---

Variance

---

Std. Deviation

---

Minimum

---

Maximum

---

Range

---

Interquartile Range

---

Skewness

---

Kurtosis

---

a. There are no valid cases for Fb\_all when group = ,000. Statistics cannot be

| Statistic | Std. Error |
|-----------|------------|
| 53.14     | 3.178      |
| 46.81     |            |
| 59.47     |            |
| 53.63     |            |
| 57.50     |            |
| 787.733   |            |
| 28.067    |            |
| 0         |            |
| 100       |            |
| 100       |            |
| 45        |            |
| -0.476    | 0.272      |
| -0.726    | 0.538      |
| 75.56     | 3.565      |
| 68.37     |            |
| 82.74     |            |
|           |            |
| 78.24     |            |
| 80.00     |            |
| 571.843   |            |
| 23.913    |            |
| 0         |            |
| 100       |            |
| 100       |            |
| 20        |            |
| -1.708    | 0.354      |
| 3.080     | 0.695      |
| 74.36     | 2.963      |
| 68.40     |            |
| 80.33     |            |
| 75.48     |            |
| 80.00     |            |
| 412.627   |            |
| 20.313    |            |
| 25        |            |
| 100       |            |
| 75        |            |
| 35        |            |
| -0.649    | 0.347      |
| -0.377    | 0.681      |

|         |       |
|---------|-------|
| 56.94   | 2.944 |
| 51.09   |       |
| 62.78   |       |
| 57.80   |       |
| 60.00   |       |
| 805.996 |       |
| 28.390  |       |
| 0       |       |
| 100     |       |
| 100     |       |
| 45      |       |
| -0.566  | 0.250 |
| -0.653  | 0.495 |
| 52.37   | 3.211 |
| 45.97   |       |
| 58.77   |       |
| 52.76   |       |
| 55.00   |       |
| 783.649 |       |
| 27.994  |       |
| 0       |       |
| 100     |       |
| 100     |       |
| 45      |       |
| -0.446  | 0.276 |
| -0.740  | 0.545 |
| 75.85   | 3.425 |
| 68.96   |       |
| 82.75   |       |
| 78.52   |       |
| 80.00   |       |
| 551.434 |       |
| 23.483  |       |
| 0       |       |
| 100     |       |
| 100     |       |
| 20      |       |
| -1.756  | 0.347 |
| 3.331   | 0.681 |
| 42.17   | 6.957 |
| 27.75   |       |
| 56.60   |       |

|           |       |
|-----------|-------|
| 41.34     |       |
| 45.00     |       |
| 1,113.241 |       |
| 33.365    |       |
| 0         |       |
| 100       |       |
| 100       |       |
| 60        |       |
| 0.199     | 0.481 |
| -1.058    | 0.935 |
| 65.75     | 2.568 |
| 60.66     |       |
| 70.84     |       |
| 67.33     |       |
| 70.00     |       |
| 659.280   |       |
| 25.676    |       |
| 0         |       |
| 100       |       |
| 100       |       |
| 29        |       |
| -0.947    | 0.241 |
| 0.276     | 0.478 |
| 53.29     | 3.461 |
| 46.39     |       |
| 60.18     |       |
| 53.79     |       |
| 60.00     |       |
| 910.368   |       |
| 30.172    |       |
| 0         |       |
| 100       |       |
| 100       |       |
| 49        |       |
| -0.509    | 0.276 |
| -0.950    | 0.545 |
| 75.00     | 4.624 |
| 65.54     |       |
| 84.46     |       |
| 77.78     |       |
| 80.00     |       |
| 641.379   |       |
| 25.325    |       |

|        |       |
|--------|-------|
| 0      |       |
| 100    |       |
| 100    |       |
| 20     |       |
| -1.796 | 0.427 |
| 3.590  | 0.833 |

↳ computed for this level.

| Hypothesis Test Summary                  |                                                                    |                                                |                     |                             |
|------------------------------------------|--------------------------------------------------------------------|------------------------------------------------|---------------------|-----------------------------|
|                                          | Null Hypothesis                                                    | Test                                           | Sig. <sup>a,b</sup> | Decision                    |
| 1                                        | The distribution of Fb_all is the same across categories of group. | <b>Independent-Samples Kruskal-Wallis Test</b> | 0.000               | Reject the null hypothesis. |
| a. The significance level is ,050.       |                                                                    |                                                |                     |                             |
| b. Asymptotic significance is displayed. |                                                                    |                                                |                     |                             |

**Pairwise Comparisons of group, sorted by effect size in descending order**

|    | Sample 1-Sample 2         | Test Statistic | Std. Error | Std. Test Statistic (z) | Sig.  |
|----|---------------------------|----------------|------------|-------------------------|-------|
| 1  | neural_genes-simult_ears  | -203.181       | 49.060     | -4.141                  | 0.000 |
| 2  | neural_genes-gap0_5       | 208.550        | 45.045     | 4.630                   | 0.000 |
| 3  | neural_genes-age0_6       | 206.959        | 45.373     | 4.561                   | 0.000 |
| 4  | neural_genes-congenital   | 186.848        | 45.045     | 4.148                   | 0.000 |
| 5  | gap_gt5-gap0_5            | 164.597        | 32.848     | 5.011                   | 0.000 |
| 6  | gap_gt5-age0_6            | 163.006        | 33.296     | 4.896                   | 0.000 |
| 7  | age_gt6-gap0_5            | -159.459       | 32.687     | -4.878                  | 0.000 |
| 8  | age_gt6-age0_6            | 157.868        | 33.137     | 4.764                   | 0.000 |
| 9  | pp_lingual-gap0_5         | 151.176        | 32.848     | 4.602                   | 0.000 |
| 10 | pp_lingual-age0_6         | 149.585        | 33.296     | 4.493                   | 0.000 |
| 11 | gap_gt5-simult_ears       | -159.228       | 38.168     | -4.172                  | 0.000 |
| 12 | gap_gt5-congenital        | 142.895        | 32.848     | 4.350                   | 0.000 |
| 13 | age_gt6-simult_ears       | -154.090       | 38.029     | -4.052                  | 0.000 |
| 14 | age_gt6-congenital        | -137.756       | 32.687     | -4.214                  | 0.000 |
| 15 | pp_lingual-simult_ears    | -145.807       | 38.168     | -3.820                  | 0.000 |
| 16 | pp_lingual-congenital     | 129.474        | 32.848     | 3.942                   | 0.000 |
| 17 | first_sec_ear-gap0_5      | -132.777       | 31.680     | -4.191                  | 0.000 |
| 18 | first_sec_ear-age0_6      | 131.186        | 32.144     | 4.081                   | 0.000 |
| 19 | first_sec_ear-simult_ears | -127.409       | 37.168     | -3.428                  | 0.001 |
| 20 | first_sec_ear-congenital  | 111.075        | 31.680     | 3.506                   | 0.000 |



|    |                            |          |        |        |       |
|----|----------------------------|----------|--------|--------|-------|
| 21 | gap_gt5-other_genes        | -87.470  | 26.938 | -3.247 | 0.001 |
| 22 | neural_genes-              | -131.423 | 40.936 | -3.210 | 0.001 |
| 23 | age_gt6-other_genes        | -82.331  | 26.741 | -3.079 | 0.002 |
| 24 | pp_lingual-other_genes     | 74.049   | 26.938 | 2.749  | 0.006 |
| 25 | other_genes-gap0_5         | 77.127   | 31.306 | 2.464  | 0.014 |
| 26 | other_genes-age0_6         | 75.536   | 31.776 | 2.377  | 0.017 |
| 27 | neural_genes-gap_gt5       | 43.953   | 42.127 | 1.043  | 0.297 |
| 28 | neural_genes-age_gt6       | 49.091   | 42.001 | 1.169  | 0.242 |
| 29 | neural_genes-pp_lingual    | -57.374  | 42.127 | -1.362 | 0.173 |
| 30 | neural_genes-first_sec_ear | 75.773   | 41.223 | 1.838  | 0.066 |
| 31 | gap_gt5-age_gt6            | 5.138    | 28.531 | 0.180  | 0.857 |
| 32 | gap_gt5-pp_lingual         | -13.421  | 28.716 | -0.467 | 0.640 |
| 33 | gap_gt5-first_sec_ear      | 31.819   | 27.372 | 1.162  | 0.245 |
| 34 | age_gt6-pp_lingual         | -8.283   | 28.531 | -0.290 | 0.772 |
| 35 | age_gt6-first_sec_ear      | -26.681  | 27.178 | -0.982 | 0.326 |
| 36 | pp_lingual-first_sec_ear   | 18.398   | 27.372 | 0.672  | 0.501 |
| 37 | first_sec_ear-other_genes  | -55.650  | 25.501 | -2.182 | 0.029 |
| 38 | other_genes-congenital     | 55.425   | 31.306 | 1.770  | 0.077 |
| 39 | other_genes-simult_ears    | -71.758  | 36.849 | -1.947 | 0.051 |
| 40 | congenital-simult_ears     | -16.333  | 41.367 | -0.395 | 0.693 |
| 41 | congenital-age0_6          | 20.111   | 36.919 | 0.545  | 0.586 |
| 42 | congenital-gap0_5          | -21.702  | 36.516 | -0.594 | 0.552 |
| 43 | simult_ears-age0_6         | 3.778    | 41.723 | 0.091  | 0.928 |
| 44 | simult_ears-gap0_5         | 5.369    | 41.367 | 0.130  | 0.897 |
| 45 | age0_6-gap0_5              | -1.591   | 36.919 | -0.043 | 0.966 |

Each row tests the null hypothesis that the Sample 1 and Sample 2 distributions are the same. Asymptotic significances (2-sided tests) are displayed. The significance level is ,050.

a. Significance values have been adjusted by the Bonferroni correction for multiple tests.

| Independent-Samples Kruskal-Wallis Test Summary |                     |
|-------------------------------------------------|---------------------|
| Total N                                         | 615                 |
| Test Statistic                                  | 85,399 <sup>a</sup> |
| Degree Of Freedom                               | 9                   |
| Asymptotic Sig.(2-sided test)                   | 0.000               |
| a. The test statistic is adjusted for ties.     |                     |

rder

| Adj. Sig. <sup>a</sup> | n   | effect size r* | effect type |
|------------------------|-----|----------------|-------------|
| 0.002                  | 53  | 0.57           | strong      |
| 0.000                  | 70  | 0.55           | strong      |
| 0.000                  | 68  | 0.55           | strong      |
| 0.002                  | 70  | 0.50           | strong      |
| 0.000                  | 123 | 0.45           | middle      |
| 0.000                  | 121 | 0.45           | middle      |
| 0.000                  | 125 | 0.44           | middle      |
| 0.000                  | 123 | 0.43           | middle      |
| 0.000                  | 123 | 0.41           | middle      |
| 0.000                  | 121 | 0.41           | middle      |
| 0.002                  | 106 | 0.41           | middle      |
| 0.001                  | 123 | 0.39           | middle      |
| 0.003                  | 108 | 0.39           | middle      |
| 0.001                  | 125 | 0.38           | middle      |
| 0.007                  | 106 | 0.37           | middle      |
| 0.004                  | 123 | 0.36           | middle      |
| 0.002                  | 140 | 0.35           | middle      |
| 0.002                  | 138 | 0.35           | middle      |
| 0.033                  | 123 | 0.31           | middle      |
| 0.025                  | 140 | 0.30           | middle      |

| group          |
|----------------|
| age_gt6        |
| age0_6         |
| congenital     |
| pp_lingual     |
| gap_gt5        |
| gap0_5         |
| neural_genes   |
| other_genes    |
| first_sec_ears |
| simult_ears    |



| N   |
|-----|
| 78  |
| 45  |
| 47  |
| 76  |
| 76  |
| 47  |
| 23  |
| 100 |
| 93  |
| 30  |



## SPSS 27: univariate analysis of variance

### Descriptive Statistics

Dependent Variable:

| group_std         | Mean  | Std. Deviation | N   |
|-------------------|-------|----------------|-----|
| age 0-6           | 75.56 | 23.913         | 45  |
| age gt6           | 53.14 | 28.067         | 78  |
| congenital        | 74.36 | 20.313         | 47  |
| first_sec_ears    | 56.94 | 28.390         | 93  |
| gap 0-5           | 75.85 | 23.483         | 47  |
| gap gt5           | 52.37 | 27.994         | 76  |
| neural genes      | 42.17 | 33.365         | 23  |
| other genes       | 65.75 | 25.676         | 100 |
| peri-post-lingual | 53.29 | 30.172         | 76  |
| simult_ears       | 75.00 | 25.325         | 30  |
| Total             | 61.34 | 28.558         | 615 |

### Levene's Test of Equality of Error Variances: variances not homogeneous

|        |                                      | Levene Statistic | df1 | df2     | Sig.  |
|--------|--------------------------------------|------------------|-----|---------|-------|
| Fb_all | Based on Mean                        | 2.870            | 9   | 605     | 0.003 |
|        | Based on Median                      | 3.040            | 9   | 605     | 0.001 |
|        | Based on Median and with adjusted df | 3.040            | 9   | 590.695 | 0.001 |
|        | Based on trimmed mean                | 3.226            | 9   | 605     | 0.001 |

no valid ANOVA; s

Tests the null hypothesis that the error variance of the dependent variable is equal across groups.

a. Dependent variable: Fb\_all

b. Design: Intercept + group

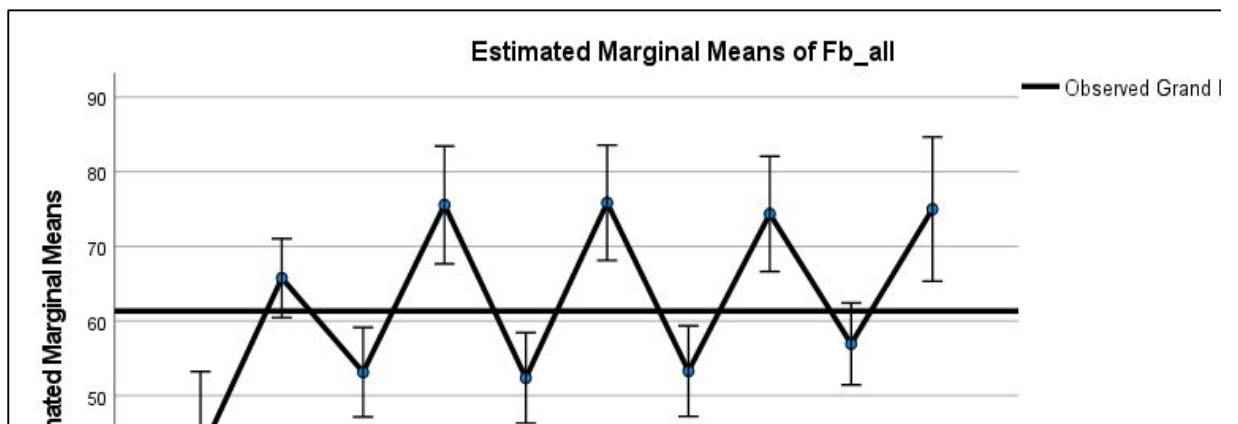

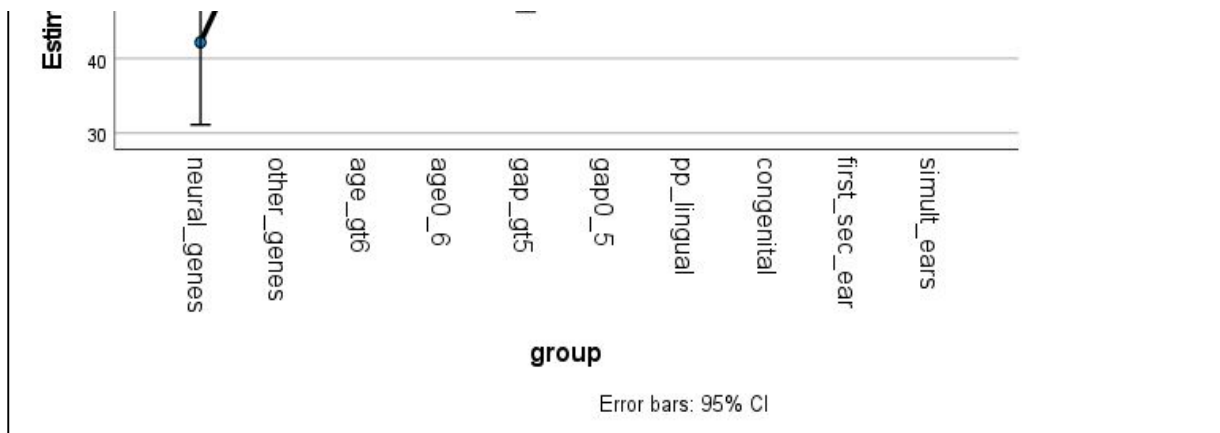

### Tests of Between-Subjects Effects

Dependent Variable:

| Source          | Type III Sum of Squares | df  | Mean Square   | F         | Sig.  | Partial Eta Squared |
|-----------------|-------------------------|-----|---------------|-----------|-------|---------------------|
| Corrected Model | 61041,941 <sup>a</sup>  | 9   | 6,782.438     | 9.332     | 0.000 | 0.122               |
| Intercept       | 1,935,260.926           | 1   | 1,935,260.926 | 2,662.640 | 0.000 | 0.815               |
| group           | 61,041.941              | 9   | 6,782.438     | 9.332     | 0.000 | 0.122               |
| Error           | 439,726.351             | 605 | 726.820       |           |       |                     |
| Total           | 2,814,875.000           | 615 |               |           |       |                     |
| Corrected Total | 500,768.293             | 614 |               |           |       |                     |

a. R Squared = .122 (Adjusted R Squared = .109)

b. Computed using alpha = .05

### Parameter Estimates

Dependent Variable:

| Parameter                      | B       | Std. Error | t      | Sig.  | 95% Confidence Interval |             |
|--------------------------------|---------|------------|--------|-------|-------------------------|-------------|
|                                |         |            |        |       | Lower Bound             | Upper Bound |
| Intercept                      | 75.000  | 4.922      | 15.237 | 0.000 | 65.333                  | 84.667      |
| [group_std=age 0-6]            | 0.556   | 6.354      | 0.087  | 0.930 | -11.924                 | 13.035      |
| [group_std=age gt6]            | -21.859 | 5.792      | -3.774 | 0.000 | -33.234                 | -10.484     |
| [group_std=congenital]         | -0.638  | 6.300      | -0.101 | 0.919 | -13.011                 | 11.734      |
| [group_std=first_sec_e<br>ars] | -18.065 | 5.661      | -3.191 | 0.001 | -29.181                 | -6.948      |
| [group_std=gap 0-5]            | 0.851   | 6.300      | 0.135  | 0.893 | -11.522                 | 13.224      |
| [group_std=gap gt5]            | -22.632 | 5.813      | -3.893 | 0.000 | -34.048                 | -11.216     |

|                               |                |       |        |       |         |         |
|-------------------------------|----------------|-------|--------|-------|---------|---------|
| [group_std=neural genes]      | -32.826        | 7.472 | -4.393 | 0.000 | -47.500 | -18.152 |
| [group_std=other genes]       | -9.250         | 5.612 | -1.648 | 0.100 | -20.272 | 1.772   |
| [group_std=peri-post-lingual] | -21.711        | 5.813 | -3.735 | 0.000 | -33.127 | -10.294 |
| [group_std=simult_ears]       | 0 <sup>a</sup> |       |        |       |         |         |

a. This parameter is set to zero because it is redundant.

b. Computed using alpha = .05



**Welch-ANOVA (variances inhomogeneous)**

**Robust Tests of Equality of Variances**

Fb\_all

|              | Statistic <sup>a</sup> | df1 |
|--------------|------------------------|-----|
| <b>Welch</b> | 9.784                  | 9   |

a. Asymptotically F distributed.

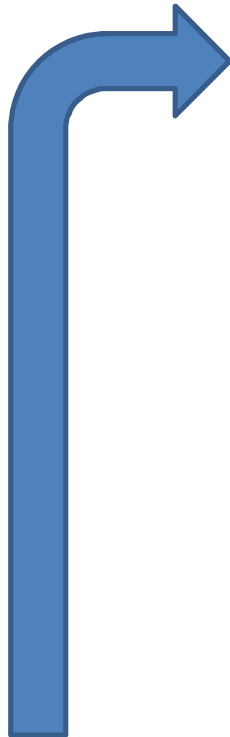

see Welch-Anova for results

|                |                | Mean Difference (I-J) |
|----------------|----------------|-----------------------|
| neural         | other          | -23,576*              |
|                | age0_6         | -33,382*              |
|                | age_gt6        | -10.967               |
|                | congenital     | -32,188*              |
|                | pp_lingual     | -11.116               |
|                | gap0_5         | -33,677*              |
|                | gap_gt5        | -10.195               |
|                | simult_ears    | -32,826*              |
|                | first-sec_ears | -14.762               |
| other          | neural         | 23,576*               |
|                | age0_6         | -9.806                |
|                | age_gt6        | 12.609                |
|                | congenital     | -8.612                |
|                | pp_lingual     | 12.461                |
|                | gap0_5         | -10.101               |
|                | gap_gt5        | 13.382                |
|                | simult_ears    | -9.250                |
| first-sec_ears | 8.815          |                       |
| age0_6         | neural         | 33,382*               |
|                | other          | 9.806                 |
|                | age_gt6        | 22,415*               |
|                | congenital     | 1.194                 |
|                | pp_lingual     | 22,266*               |
|                | gap0_5         | -0.296                |

Mean

| Noncent. Parameter | Observed Power <sup>b</sup> |
|--------------------|-----------------------------|
| 83.985             | 1.000                       |
| 2,662.640          | 1.000                       |
| 83.985             | 1.000                       |
|                    |                             |
|                    |                             |
|                    |                             |

| Partial Eta Squared | Noncent. Parameter | Observed Power <sup>b</sup> |
|---------------------|--------------------|-----------------------------|
| 0.277               | 15.237             | 1.000                       |
| 0.000               | 0.087              | 0.051                       |
| 0.023               | 3.774              | 0.965                       |
| 0.000               | 0.101              | 0.051                       |
| 0.017               | 3.191              | 0.890                       |
| 0.000               | 0.135              | 0.052                       |
| 0.024               | 3.893              | 0.973                       |

|                |                |          |
|----------------|----------------|----------|
|                | gap_gt5        | 23,187*  |
|                | simult_ears    | 0.556    |
|                | first-sec_ears | 18,620*  |
| age_gt6        | neural         | 10.967   |
|                | other          | -12.609  |
|                | age0_6         | -22,415* |
|                | congenital     | -21,221* |
|                | pp_lingual     | -0.148   |
|                | gap0_5         | -22,710* |
|                | gap_gt5        | 0.773    |
|                | simult_ears    | -21,859* |
|                | first-sec_ears | -3.794   |
| congenital     | neural         | 32,188*  |
|                | other          | 8.612    |
|                | age0_6         | -1.194   |
|                | age_gt6        | 21,221*  |
|                | pp_lingual     | 21,072*  |
|                | gap0_5         | -1.489   |
|                | gap_gt5        | 21,993*  |
|                | simult_ears    | -0.638   |
| pp_lingual     | first-sec_ears | 17,426*  |
|                | neural         | 11.116   |
|                | other          | -12.461  |
|                | age0_6         | -22,266* |
|                | age_gt6        | 0.148    |
|                | congenital     | -21,072* |
|                | gap0_5         | -22,562* |
|                | gap_gt5        | 0.921    |
|                | simult_ears    | -21,711* |
| first-sec_ears | -3.646         |          |
| gap0_5         | neural         | 33,677*  |
|                | other          | 10.101   |
|                | age0_6         | 0.296    |
|                | age_gt6        | 22,710*  |
|                | congenital     | 1.489    |
|                | pp_lingual     | 22,562*  |
|                | gap_gt5        | 23,483*  |

|       |       |       |
|-------|-------|-------|
| 0.031 | 4.393 | 0.992 |
| 0.004 | 1.648 | 0.377 |
| 0.023 | 3.735 | 0.962 |
|       |       |       |

|                |                |          |
|----------------|----------------|----------|
|                | simult_ears    | 0.851    |
|                | first-sec_ears | 18,916*  |
| gap_gt5        | neural         | 10.195   |
|                | other          | -13.382  |
|                | age0_6         | -23,187* |
|                | age_gt6        | -0.773   |
|                | congenital     | -21,993* |
|                | pp_lingual     | -0.921   |
|                | gap0_5         | -23,483* |
|                | simult_ears    | -22,632* |
|                | first-sec_ears | -4.567   |
| simult_ears    | neural         | 32,826*  |
|                | other          | 9.250    |
|                | age0_6         | -0.556   |
|                | age_gt6        | 21,859*  |
|                | congenital     | 0.638    |
|                | pp_lingual     | 21,711*  |
|                | gap0_5         | -0.851   |
|                | gap_gt5        | 22,632*  |
| first-sec_ears | 18.065         |          |
| first-sec_ears | neural         | 14.762   |
|                | other          | -8.815   |
|                | age0_6         | -18,620* |
|                | age_gt6        | 3.794    |
|                | congenital     | -17,426* |
|                | pp_lingual     | 3.646    |
|                | gap0_5         | -18,916* |
|                | gap_gt5        | 4.567    |
|                | simult_ears    | -18.065  |

\*. The mean difference

s)

ility of Means

|         |              |
|---------|--------------|
| df2     | Sig.         |
| 189.053 | <b>0.000</b> |

Multiple Comparisons

| Std. Error | Sig.         | 95% Confidence Interval |             |
|------------|--------------|-------------------------|-------------|
|            |              | Lower Bound             | Upper Bound |
| 6.235      | <b>0.008</b> | -44.00                  | -3.15       |
| 6.910      | <b>0.000</b> | -56.02                  | -10.74      |
| 6.397      | 1.000        | -31.93                  | 9.99        |
| 6.860      | <b>0.000</b> | -54.67                  | -9.71       |
| 6.416      | 1.000        | -32.14                  | 9.91        |
| 6.860      | <b>0.000</b> | -56.16                  | -11.20      |
| 6.416      | 1.000        | -31.22                  | 10.83       |
| 7.472      | <b>0.001</b> | -57.31                  | -8.34       |
| 6.278      | 0.856        | -35.33                  | 5.81        |
| 6.235      | <b>0.008</b> | 3.15                    | 44.00       |
| 4.839      | 1.000        | -25.66                  | 6.05        |
| 4.073      | 0.092        | -0.74                   | 25.95       |
| 4.768      | 1.000        | -24.23                  | 7.01        |
| 4.103      | 0.112        | -0.98                   | 25.90       |
| 4.768      | 1.000        | -25.72                  | 5.52        |
| 4.103      | 0.053        | -0.06                   | 26.82       |
| 5.612      | 1.000        | -27.64                  | 9.14        |
| 3.884      | 1.000        | -3.91                   | 21.54       |
| 6.910      | <b>0.000</b> | 10.74                   | 56.02       |
| 4.839      | 1.000        | -6.05                   | 25.66       |
| 5.047      | <b>0.000</b> | 5.88                    | 38.95       |
| 5.623      | 1.000        | -17.23                  | 19.62       |
| 5.071      | <b>0.001</b> | 5.65                    | 38.88       |
| 5.623      | 1.000        | -18.72                  | 18.13       |

|         |
|---------|
| mean Fb |
| 42.2    |
| 75.6    |
| 53.1    |
| 74.4    |
| 75.9    |
| 52.4    |
| 53.3    |

|       |              |        |       |
|-------|--------------|--------|-------|
| 5.071 | <b>0.000</b> | 6.57   | 39.80 |
| 6.354 | 1.000        | -20.26 | 21.38 |
| 4.896 | <b>0.007</b> | 2.58   | 34.66 |
| 6.397 | 1.000        | -9.99  | 31.93 |
| 4.073 | 0.092        | -25.95 | 0.74  |
| 5.047 | <b>0.000</b> | -38.95 | -5.88 |
| 4.978 | <b>0.001</b> | -37.53 | -4.91 |
| 4.345 | 1.000        | -14.39 | 14.09 |
| 4.978 | <b>0.000</b> | -39.02 | -6.40 |
| 4.345 | 1.000        | -13.46 | 15.01 |
| 5.792 | <b>0.008</b> | -40.84 | -2.88 |
| 4.139 | 1.000        | -17.36 | 9.77  |
| 6.860 | <b>0.000</b> | 9.71   | 54.67 |
| 4.768 | 1.000        | -7.01  | 24.23 |
| 5.623 | 1.000        | -19.62 | 17.23 |
| 4.978 | <b>0.001</b> | 4.91   | 37.53 |
| 5.003 | <b>0.001</b> | 4.68   | 37.46 |
| 5.561 | 1.000        | -19.71 | 16.73 |
| 5.003 | <b>0.001</b> | 5.60   | 38.38 |
| 6.300 | 1.000        | -21.28 | 20.00 |
| 4.825 | <b>0.015</b> | 1.62   | 33.24 |
| 6.416 | 1.000        | -9.91  | 32.14 |
| 4.103 | 0.112        | -25.90 | 0.98  |
| 5.071 | <b>0.001</b> | -38.88 | -5.65 |
| 4.345 | 1.000        | -14.09 | 14.39 |
| 5.003 | <b>0.001</b> | -37.46 | -4.68 |
| 5.003 | <b>0.000</b> | -38.95 | -6.17 |
| 4.373 | 1.000        | -13.41 | 15.25 |
| 5.813 | <b>0.009</b> | -40.76 | -2.66 |
| 4.169 | 1.000        | -17.31 | 10.01 |
| 6.860 | <b>0.000</b> | 11.20  | 56.16 |
| 4.768 | 1.000        | -5.52  | 25.72 |
| 5.623 | 1.000        | -18.13 | 18.72 |
| 4.978 | <b>0.000</b> | 6.40   | 39.02 |
| 5.561 | 1.000        | -16.73 | 19.71 |
| 5.003 | <b>0.000</b> | 6.17   | 38.95 |
| 5.003 | <b>0.000</b> | 7.09   | 39.87 |

|             |
|-------------|
| other       |
| age0_6      |
| congenital  |
| gap0_5      |
| simult_ears |

|                |
|----------------|
| age_gt6        |
| pp_lingual     |
| gap_gt5        |
| first-sec_ears |

|             |
|-------------|
| congenital  |
| gap0_5      |
| simult_ears |

|            |
|------------|
| pp_lingual |
| gap_gt5    |

|                |
|----------------|
| gap_gt5        |
| first-sec_ears |

|             |
|-------------|
| simult_ears |
|-------------|

|             |
|-------------|
| simult_ears |
|-------------|

|       |              |        |       |
|-------|--------------|--------|-------|
| 6.300 | 1.000        | -19.79 | 21.49 |
| 4.825 | <b>0.004</b> | 3.11   | 34.72 |
| 6.416 | 1.000        | -10.83 | 31.22 |
| 4.103 | 0.053        | -26.82 | 0.06  |
| 5.071 | 0.000        | -39.80 | -6.57 |
| 4.345 | 1.000        | -15.01 | 13.46 |
| 5.003 | <b>0.001</b> | -38.38 | -5.60 |
| 4.373 | 1.000        | -15.25 | 13.41 |
| 5.003 | <b>0.000</b> | -39.87 | -7.09 |
| 5.813 | <b>0.005</b> | -41.68 | -3.59 |
| 4.169 | 1.000        | -18.23 | 9.09  |
| 7.472 | <b>0.001</b> | 8.34   | 57.31 |
| 5.612 | 1.000        | -9.14  | 27.64 |
| 6.354 | 1.000        | -21.38 | 20.26 |
| 5.792 | <b>0.008</b> | 2.88   | 40.84 |
| 6.300 | 1.000        | -20.00 | 21.28 |
| 5.813 | <b>0.009</b> | 2.66   | 40.76 |
| 6.300 | 1.000        | -21.49 | 19.79 |
| 5.813 | <b>0.005</b> | 3.59   | 41.68 |
| 5.661 | 0.067        | -0.48  | 36.61 |
| 6.278 | 0.856        | -5.81  | 35.33 |
| 3.884 | 1.000        | -21.54 | 3.91  |
| 4.896 | <b>0.007</b> | -34.66 | -2.58 |
| 4.139 | 1.000        | -9.77  | 17.36 |
| 4.825 | <b>0.015</b> | -33.24 | -1.62 |
| 4.169 | 1.000        | -10.01 | 17.31 |
| 4.825 | <b>0.004</b> | -34.72 | -3.11 |
| 4.169 | 1.000        | -9.09  | 18.23 |
| 5.661 | 0.067        | -36.61 | 0.48  |

nce is significant at the 0.05 level.

|                |             |             |             |             |             |             |             |
|----------------|-------------|-------------|-------------|-------------|-------------|-------------|-------------|
| <b>mean Fb</b> | <b>65.8</b> | <b>75.6</b> | <b>53.1</b> | <b>74.4</b> | <b>53.3</b> | <b>75.9</b> | <b>52.4</b> |
|                | other       | age0_6      | age_gt6     | congenital  | pp_lingual  | gap0_5      | gap_gt5     |
| neural         | *           | *           |             | *           |             | *           |             |
| age0_6         |             |             | *           |             | *           |             | *           |
| age_gt6        |             |             |             | *           |             | *           |             |
| congenital     |             |             |             |             | *           |             | *           |
| gap0_5         |             |             |             |             |             |             | *           |
| gap_gt5        |             |             |             |             |             |             |             |
| pp_lingual     |             |             |             |             |             |             |             |

| factor         | mean Fb | SD   |
|----------------|---------|------|
| neural genes   | 42.2    | 33.4 |
| gap_gt5        | 52.4    | 28.0 |
| age_gt6        | 53.1    | 28.1 |
| pp_lingual     | 53.3    | 30.2 |
| first-sec_ears | 56.9    | 28.4 |
| mean total     | 61.3    | 28.6 |
| other genes    | 65.8    | 25.7 |
| congenital     | 74.4    | 20.3 |
| simult_ears    | 75.0    | 25.3 |
| age0_6         | 75.6    | 23.9 |
| gap0_5         | 75.9    | 23.5 |

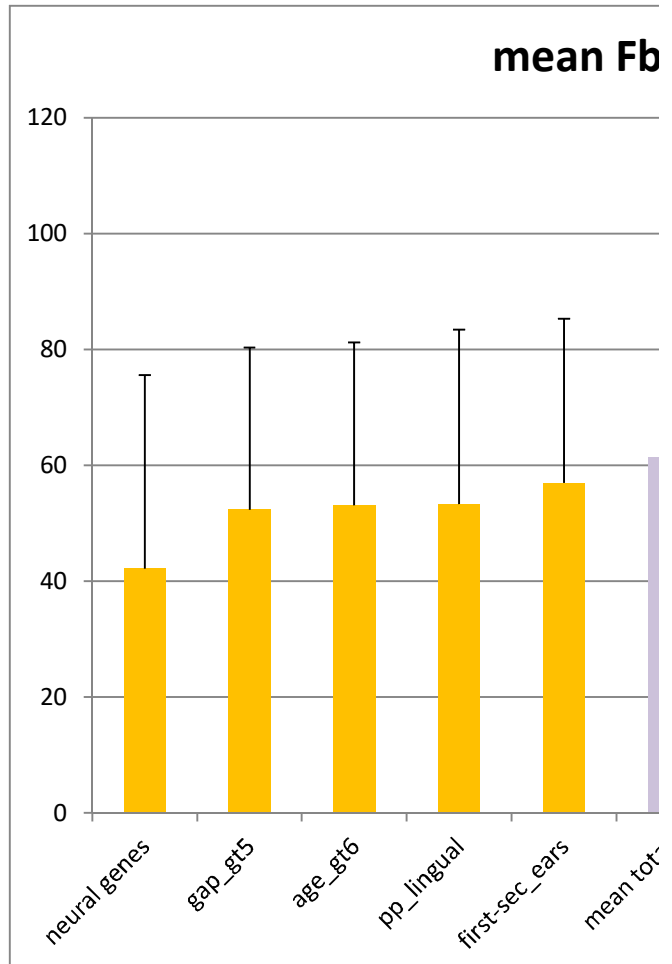

**Effektstärke**

| neural | Cohens d |      |
|--------|----------|------|
| *      | 0.87     | groß |
| *      | 1.22     | groß |
| *      | 1.27     | groß |
| *      | 1.24     | groß |
| *      | 1.13     | groß |

Ref.:

Hemmerich, W. (2015). StatistikGuru: Cohen's d berechnen  
 Cohen, J. (1988). *Statistical power analysis for the behavioral sciences*

d ≥ 0.8      großer Effekt  
 d ≥ 0.5      mittel  
 d ≥ 0.2      klein

| age0_6 |      |        |
|--------|------|--------|
| *      | 0.84 | groß   |
| *      | 0.80 | groß   |
| *      | 0.87 | groß   |
| *      | 0.69 | mittel |

| age_gt6 |      |      |
|---------|------|------|
| *       | 0.83 | groß |
| *       | 0.86 | groß |
| *       | 0.80 | groß |

| congenital |      |        |
|------------|------|--------|
| *          | 0.79 | mittel |
| *          | 0.87 | groß   |

| gap0_5 |      |        |
|--------|------|--------|
| *      | 0.89 | groß   |
| *      | 0.70 | mittel |

| gap_gt5 |      |      |
|---------|------|------|
| *       | 0.83 | groß |

| pp_lingual |      |        |
|------------|------|--------|
| *          | 0.76 | mittel |

| group_std         | Mean  | Std. Deviation | N   |
|-------------------|-------|----------------|-----|
| age 0-6           | 75.56 | 23.913         | 45  |
| age gt6           | 53.14 | 28.067         | 78  |
| congenital        | 74.36 | 20.313         | 47  |
| first_sec_ear s   | 56.94 | 28.390         | 93  |
| gap 0-5           | 75.85 | 23.483         | 47  |
| gap gt5           | 52.37 | 27.994         | 76  |
| neural genes      | 42.17 | 33.365         | 23  |
| other genes       | 65.75 | 25.676         | 100 |
| peri-post-lingual | 53.29 | 30.172         | 76  |
| simult_ears       | 75.00 | 25.325         | 30  |
| Total             | 61.34 | 28.558         | 615 |





## ANOVA: standard

Dependent Variable:

group\_std

|                   |
|-------------------|
| age 0-6           |
| age gt6           |
| congenital        |
| first_sec_ears    |
| gap 0-5           |
| gap gt5           |
| neural_genes      |
| other_genes       |
| peri-post-lingual |
| simult_ears       |
| Total             |

|             |                |                 |
|-------------|----------------|-----------------|
| <b>75.0</b> | <b>56.9</b>    |                 |
| simult_ears | first-sec_ears | number of sign. |
| *           |                | 5               |
|             | *              | 4               |
| *           |                | 3               |
|             |                | 2               |
|             | *              | 2               |
| *           |                | 1               |
| *           |                | 1               |

18

(+ SD)

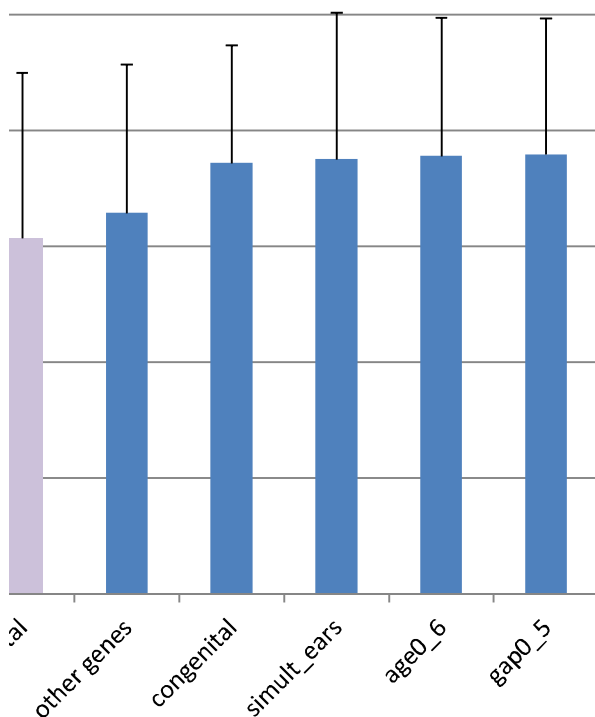

std\_Fb\_all

Tests the null hypothesis that

a. Dependent variable: std

b. Design: Intercept + group\_std

Dependent Variable:

Source

|                 |
|-----------------|
| Corrected Model |
| Intercept       |
| group_std       |
| Error           |
| Total           |

---

nen. Retrieved from <https://statistikguru.de/rechner/cohens-d.html>  
*alysis for the behavioral sciences* (2nd ed). Hillsdale, N.J: L. Erlbaum Associates.

Corrected Total  
a. R Squared = .122 (Adju  
b. Computed using alpha :

Dependent Variable:

| Parameter                         |
|-----------------------------------|
| Intercept                         |
| [group_std=age 0-6]               |
| [group_std=age gt6]               |
| [group_std=congenital]            |
| [group_std=first_sec_ea<br>rs]    |
| [group_std=gap 0-5]               |
| [group_std=gap gt5]               |
| [group_std=neural<br>genes]       |
| [group_std=other genes]           |
| [group_std=peri-post-<br>lingual] |
| [group_std=simult_ears]           |

a. This parameter is set to  
b. Computed using alpha :



ised, minus all-over median (70)

### Descriptive Statistics

std\_Fb\_all

| Mean   | Std. Deviation | N   |
|--------|----------------|-----|
| 5.56   | 23.913         | 45  |
| -16.86 | 28.067         | 78  |
| 4.36   | 20.313         | 47  |
| -13.06 | 28.390         | 93  |
| 5.85   | 23.483         | 47  |
| -17.63 | 27.994         | 76  |
| -27.83 | 33.365         | 23  |
| -4.25  | 25.676         | 100 |
| -16.71 | 30.172         | 76  |
| 5.00   | 25.325         | 30  |
| -8.66  | 28.558         | 615 |

### Levene's Test of Equality of Error Variances<sup>a,b</sup>

|                                      | Levene Statistic | df1 | df2     | Sig.  |
|--------------------------------------|------------------|-----|---------|-------|
| Based on Mean                        | 2.870            | 9   | 605     | 0.003 |
| Based on Median                      | 3.040            | 9   | 605     | 0.001 |
| Based on Median and with adjusted df | 3.040            | 9   | 590.695 | 0.001 |
| Based on trimmed mean                | 3.226            | 9   | 605     | 0.001 |

see Welch-Anova (same results)

that the error variance of the dependent variable is equal across groups.

\_Fb\_all

\_jp\_std

### Tests of Between-Subjects Effects

| Type III Sum of Squares | df  | Mean Square | F      | Sig.  | Partial Eta Squared | Noncent. Parameter |
|-------------------------|-----|-------------|--------|-------|---------------------|--------------------|
| 61041,941 <sup>a</sup>  | 9   | 6,782.438   | 9.332  | 0.000 | 0.122               | 83.985             |
| 28,347.461              | 1   | 28,347.461  | 39.002 | 0.000 | 0.061               | 39.002             |
| 61,041.941              | 9   | 6,782.438   | 9.332  | 0.000 | 0.122               | 83.985             |
| 439,726.351             | 605 | 726.820     |        |       |                     |                    |
| 546,875.000             | 615 |             |        |       |                     |                    |

|             |     |  |  |  |  |  |
|-------------|-----|--|--|--|--|--|
| 500,768.293 | 614 |  |  |  |  |  |
|-------------|-----|--|--|--|--|--|

Adjusted R Squared = .109)

= .05

### Parameter Estimates

| B              | Std. Error | t      | Sig.         | 95% Confidence Interval |             | Partial Eta Squared |
|----------------|------------|--------|--------------|-------------------------|-------------|---------------------|
|                |            |        |              | Lower Bound             | Upper Bound |                     |
| 5.000          | 4.922      | 1.016  | <b>0.310</b> | -4.667                  | 14.667      | <b>0.002</b>        |
| 0.556          | 6.354      | 0.087  | 0.930        | -11.924                 | 13.035      | 0.000               |
| -21.859        | 5.792      | -3.774 | 0.000        | -33.234                 | -10.484     | 0.023               |
| -0.638         | 6.300      | -0.101 | 0.919        | -13.011                 | 11.734      | 0.000               |
| -18.065        | 5.661      | -3.191 | 0.001        | -29.181                 | -6.948      | 0.017               |
| 0.851          | 6.300      | 0.135  | 0.893        | -11.522                 | 13.224      | 0.000               |
| -22.632        | 5.813      | -3.893 | 0.000        | -34.048                 | -11.216     | 0.024               |
| -32.826        | 7.472      | -4.393 | 0.000        | -47.500                 | -18.152     | 0.031               |
| -9.250         | 5.612      | -1.648 | 0.100        | -20.272                 | 1.772       | 0.004               |
| -21.711        | 5.813      | -3.735 | 0.000        | -33.127                 | -10.294     | 0.023               |
| 0 <sup>a</sup> |            |        |              |                         |             |                     |

<sup>a</sup> zero because it is redundant.

= .05



)

| Observed Power <sup>b</sup> |
|-----------------------------|
| 1.000                       |
| 1.000                       |
| 1.000                       |
|                             |
|                             |
|                             |



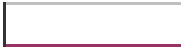

**Fb normal**

| Noncent. Parameter | Observed Power <sup>b</sup> |                               | Sig.         | Partial Eta Squared |
|--------------------|-----------------------------|-------------------------------|--------------|---------------------|
| 1.016              | 0.174                       | Intercept                     | <b>0.000</b> | <b>0.277</b>        |
| 0.087              | 0.051                       | [group_std=age 0-6]           | 0.930        | 0.000               |
| 3.774              | 0.965                       | [group_std=age gt6]           | 0.000        | 0.023               |
| 0.101              | 0.051                       | [group_std=congenital]        | 0.919        | 0.000               |
| 3.191              | 0.890                       | [group_std=first_sec_ears]    | 0.001        | 0.017               |
| 0.135              | 0.052                       | [group_std=gap 0-5]           | 0.893        | 0.000               |
| 3.893              | 0.973                       | [group_std=gap gt5]           | 0.000        | 0.024               |
| 4.393              | 0.992                       | [group_std=neural genes]      | 0.000        | 0.031               |
| 1.648              | 0.377                       | [group_std=other genes]       | 0.100        | 0.004               |
| 3.735              | 0.962                       | [group_std=peri-post-lingual] | 0.000        | 0.023               |
|                    |                             | [group_std=simult_ears]       |              |                     |

## Descriptive Statistics

Dependent Variable:

| Analysis - Category   | Mean    | Std. Deviation | N   |
|-----------------------|---------|----------------|-----|
| Bilateral SSNHL       | 0.5762  | 0.66952        | 13  |
| Menieres Disease      | 0.1667  | 0.61513        | 6   |
| Neural - Genetic      | -0.4171 | 0.98715        | 24  |
| Other                 | -0.5922 | 0.97511        | 9   |
| Otosclerosis          | 0.6460  | 0.42395        | 5   |
| Sensory - Genetic     | 0.5208  | 0.81391        | 12  |
| Single Sided Deafness | -0.5923 | 0.89798        | 26  |
| Unknown               | -0.1120 | 0.86824        | 60  |
| Total                 | -0.1257 | 0.93459        | 155 |

| Post-hoc tests        |                       | Sig.     |         |       |
|-----------------------|-----------------------|----------|---------|-------|
| Bilateral SSNHL       | Single Sided Deafness | 1,1685*  | 0.29375 | 0.003 |
| Single Sided Deafness | Bilateral SSNHL       | -1,1685* | 0.29375 | 0.003 |
| Bilateral SSNHL       | Neural - Genetic      | ,9932*   | 0.29780 | 0.030 |
| Neural - Genetic      | Bilateral SSNHL       | -,9932*  | 0.29780 | 0.030 |
| Sensory - Genetic     | Single Sided Deafness | 1,1131*  | 0.30180 | 0.009 |
| Single Sided Deafness | Sensory - Genetic     | -1,1131* | 0.30180 | 0.009 |
| Bilateral SSNHL       | Other                 | 1.1684   | 0.37499 | 0.062 |
| Other                 | Bilateral SSNHL       | -1.1684  | 0.37499 | 0.062 |
| Neural - Genetic      | Sensory - Genetic     | -0.9379  | 0.30575 | 0.072 |
| Sensory - Genetic     | Neural - Genetic      | 0.9379   | 0.30575 | 0.072 |
| Otosclerosis          | Single Sided Deafness | 1.2383   | 0.42229 | 0.109 |
| Single Sided Deafness | Otosclerosis          | -1.2383  | 0.42229 | 0.109 |
| Other                 | Sensory - Genetic     | -1.1131  | 0.38133 | 0.114 |

|                       |                       |         |         |       |
|-----------------------|-----------------------|---------|---------|-------|
| Sensory - Genetic     | Other                 | 1.1131  | 0.38133 | 0.114 |
| Bilateral SSNHL       | Unknown               | 0.6882  | 0.26456 | 0.287 |
| Unknown               | Bilateral SSNHL       | -0.6882 | 0.26456 | 0.287 |
| Other                 | Otosclerosis          | -1.2382 | 0.48235 | 0.315 |
| Otosclerosis          | Other                 | 1.2382  | 0.48235 | 0.315 |
| Neural - Genetic      | Otosclerosis          | -1.0631 | 0.42512 | 0.378 |
| Otosclerosis          | Neural - Genetic      | 1.0631  | 0.42512 | 0.378 |
| Single Sided Deafness | Unknown               | -0.4803 | 0.20304 | 0.541 |
| Unknown               | Single Sided Deafness | 0.4803  | 0.20304 | 0.541 |
| Sensory - Genetic     | Unknown               | 0.6328  | 0.27347 | 0.617 |
| Unknown               | Sensory - Genetic     | -0.6328 | 0.27347 | 0.617 |
| Bilateral SSNHL       | Menieres Disease      | 0.4095  | 0.42681 | 1.000 |
| Bilateral SSNHL       | Otosclerosis          | -0.0698 | 0.45508 | 1.000 |
| Bilateral SSNHL       | Sensory - Genetic     | 0.0553  | 0.34619 | 1.000 |
| Menieres Disease      | Bilateral SSNHL       | -0.4095 | 0.42681 | 1.000 |
| Menieres Disease      | Neural - Genetic      | 0.5838  | 0.39472 | 1.000 |
| Menieres Disease      | Other                 | 0.7589  | 0.45578 | 1.000 |
| Menieres Disease      | Otosclerosis          | -0.4793 | 0.52365 | 1.000 |
| Menieres Disease      | Sensory - Genetic     | -0.3542 | 0.43239 | 1.000 |
| Menieres Disease      | Single Sided Deafness | 0.7590  | 0.39167 | 1.000 |
| Menieres Disease      | Unknown               | 0.2787  | 0.37028 | 1.000 |
| Neural - Genetic      | Menieres Disease      | -0.5838 | 0.39472 | 1.000 |
| Neural - Genetic      | Other                 | 0.1751  | 0.33801 | 1.000 |
| Neural - Genetic      | Single Sided Deafness | 0.1752  | 0.24479 | 1.000 |
| Neural - Genetic      | Unknown               | -0.3051 | 0.20886 | 1.000 |
| Other                 | Menieres Disease      | -0.7589 | 0.45578 | 1.000 |
| Other                 | Neural - Genetic      | -0.1751 | 0.33801 | 1.000 |
| Other                 | Single Sided Deafness | 0.0001  | 0.33445 | 1.000 |
| Other                 | Unknown               | -0.4802 | 0.30912 | 1.000 |

|                       |                   |         |         |       |
|-----------------------|-------------------|---------|---------|-------|
| Otosclerosis          | Bilateral SSNHL   | 0.0698  | 0.45508 | 1.000 |
| Otosclerosis          | Menieres Disease  | 0.4793  | 0.52365 | 1.000 |
| Otosclerosis          | Sensory - Genetic | 0.1252  | 0.46031 | 1.000 |
| Otosclerosis          | Unknown           | 0.7580  | 0.40253 | 1.000 |
| Sensory - Genetic     | Bilateral SSNHL   | -0.0553 | 0.34619 | 1.000 |
| Sensory - Genetic     | Menieres Disease  | 0.3542  | 0.43239 | 1.000 |
| Sensory - Genetic     | Otosclerosis      | -0.1252 | 0.46031 | 1.000 |
| Single Sided Deafness | Menieres Disease  | -0.7590 | 0.39167 | 1.000 |
| Single Sided Deafness | Neural - Genetic  | -0.1752 | 0.24479 | 1.000 |
| Single Sided Deafness | Other             | -0.0001 | 0.33445 | 1.000 |
| Unknown               | Menieres Disease  | -0.2787 | 0.37028 | 1.000 |
| Unknown               | Neural - Genetic  | 0.3051  | 0.20886 | 1.000 |
| Unknown               | Other             | 0.4802  | 0.30912 | 1.000 |
| Unknown               | Otosclerosis      | -0.7580 | 0.40253 | 1.000 |



|                                                 |                |       |        |              |        |        |              |
|-------------------------------------------------|----------------|-------|--------|--------------|--------|--------|--------------|
| Intercept                                       | -0.112         | 0.112 | -1.003 | 0.317        | -0.333 | 0.109  | <b>0.007</b> |
| [AnalysisCategory=<br>Bilateral SSNHL]          | 0.688          | 0.265 | 2.601  | <b>0.010</b> | 0.165  | 1.211  | <b>0.044</b> |
| [AnalysisCategory=<br>Menieres Disease]         | 0.279          | 0.370 | 0.753  | 0.453        | -0.453 | 1.010  | 0.004        |
| [AnalysisCategory=<br>Neural - Genetic]         | -0.305         | 0.209 | -1.461 | 0.146        | -0.718 | 0.108  | 0.014        |
| [AnalysisCategory=<br>Other]                    | -0.480         | 0.309 | -1.553 | 0.122        | -1.091 | 0.131  | 0.016        |
| [AnalysisCategory=<br>Otosclerosis]             | 0.758          | 0.403 | 1.883  | 0.062        | -0.037 | 1.553  | 0.024        |
| [AnalysisCategory=<br>Sensory - Genetic]        | 0.633          | 0.273 | 2.314  | <b>0.022</b> | 0.092  | 1.173  | <b>0.035</b> |
| [AnalysisCategory=<br>Single Sided<br>Deafness] | -0.480         | 0.203 | -2.366 | <b>0.019</b> | -0.882 | -0.079 | <b>0.037</b> |
| [AnalysisCategory=<br>Unknown]                  | 0 <sup>a</sup> |       |        |              |        |        |              |

a. This parameter is set to zero because it is redundant.

b. Computed using alpha = .05

**Neural-genetic nicht signifikant, daher kann part. Eta-Quadrat nicht verwendet werden !**



ANOVA valid

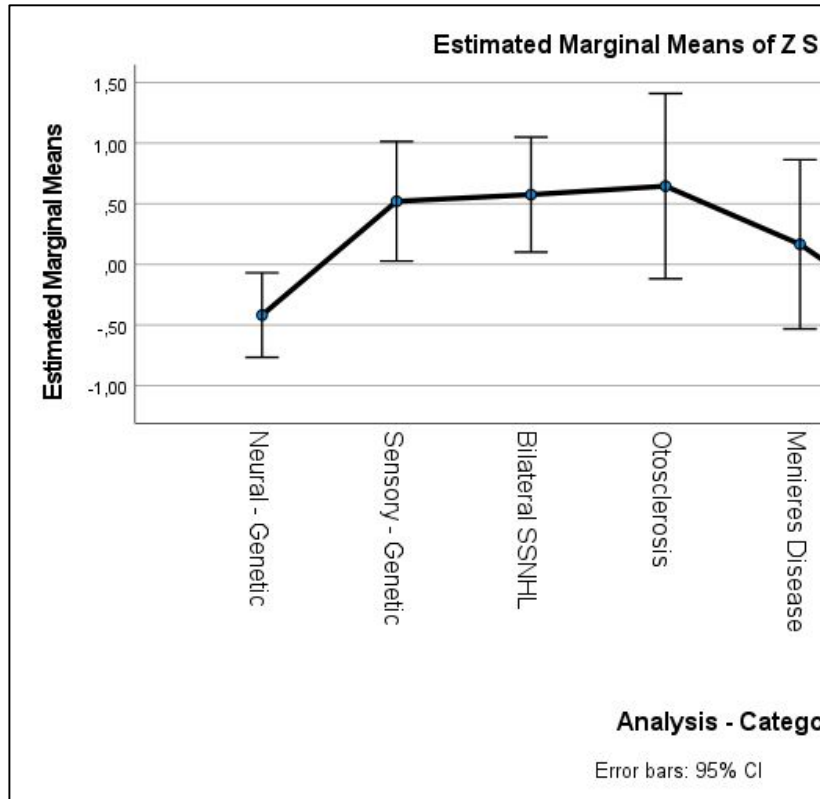

| Observed Power <sup>b</sup> |
|-----------------------------|
| 0.994                       |
| 0.058                       |
| 0.994                       |
|                             |
|                             |
|                             |

| Noncent. Parameter | Observed Power <sup>b</sup> |
|--------------------|-----------------------------|
|                    |                             |



|       |       |
|-------|-------|
| 1.003 | 0.169 |
| 2.601 | 0.734 |
| 0.753 | 0.116 |
| 1.461 | 0.306 |
| 1.553 | 0.339 |
| 1.883 | 0.465 |
| 2.314 | 0.633 |
| 2.366 | 0.652 |
|       |       |



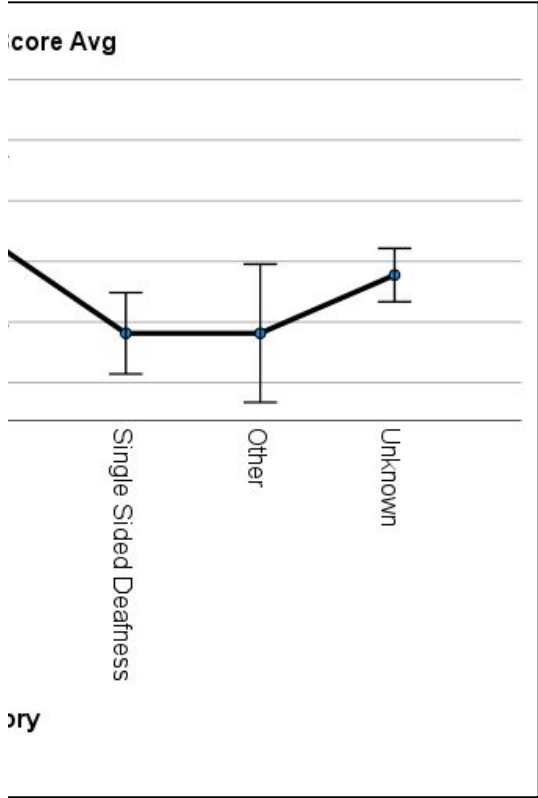

Supplement: aud-44-1464-s003.pdf [file aud-44-1464-s003.pdf]
