# Supplementary material for: Variability in Cochlear Implantation Outcomes in a Large German Cohort With a Genetic Etiology of Hearing Loss
Source: PubMed Central journal article supplement — Ear Hear. 2023 Jul 13;44(6):1464–84. doi: 10.1097/AUD.0000000000001386 (PMC10583923; doi:10.1097/aud.0000000000001386), 2023-07-13
Supplement: aud-44-1464-s001.pdf [file aud-44-1464-s001.pdf]

**Variability in Cochlear Implantation Outcomes  
in a Large German Cohort with a Genetic Etiology of Hearing Loss**

**Supplemental Digital Content 1.**

Genetic Variants of all Genetically Diagnosed Cochlear Implant Patients (n=76) in alphabetical order.

| ID                   | Gene transcript                | Variant 1 (protein change 1)  | Variant type | Variant 2 (protein change 2)  | Variant type | Zyg      | Clin Var | DVD  | ACMG/AMP | ACMG/AMP rules applied§                                                                                                                                                           | Seg |
|----------------------|--------------------------------|-------------------------------|--------------|-------------------------------|--------------|----------|----------|------|----------|-----------------------------------------------------------------------------------------------------------------------------------------------------------------------------------|-----|
| 25 <sup>&amp;</sup>  | <i>ACTG1</i><br>NM_001199954.1 | c.721G>A<br>(p.(Glu241Lys))   | Missense     | -                             | -            | Het      | LP       | P    | LP       | PS1_Strong,<br>PM2_Moderate,<br>PP3_Supporting                                                                                                                                    | ND  |
| 39 <sup>&amp;</sup>  | <i>CDH23</i><br>NM_022124.5    | c.3215C>A<br>(p.(Ala1072Asp)) | Missense     | c.3215C>A<br>(p.(Ala1072Asp)) | Missense     | Hom      | US       | P    | LP, LP   | PS1_Supporting,<br>PM2_Moderate,<br>PM3_Supporting,<br>PP3_Supporting;<br>PS1_Supporting,<br>PM2_Moderate,<br>PM3_Supporting,<br>PP3_Supporting                                   | ND  |
| 1021                 | <i>CDH23</i><br>NM_022124.5    | c.902G>A<br>(p.(Arg301Gln))   | Missense     | c.6253+1G>A<br>p.?            | Splice donor | Comp het | P/LP     | P/LP | LP/LP    | PS1_Supporting,<br>PM1_Moderate,<br>PM2_Moderate,<br>PM3_Supporting,<br>PP3_Supporting;<br>PS1_Supporting,<br>PM1_Moderate,<br>PM2_Moderate,<br>PM3_Supporting,<br>PP3_Supporting | ND  |
| 285 <sup>&amp;</sup> | <i>COCH</i><br>NM_001347720.1  | c.346C>T<br>(p.(Pro116Ser))   | Missense     | -                             | -            | Het      | P        | P    | LP       | PS1_Strong,<br>PM2_Moderate,<br>PP3_Supporting                                                                                                                                    | ND  |
| 58 <sup>&amp;</sup>  | <i>COL11A1</i><br>NM_080629.2  | c.2644C>T<br>(p.(Arg882Trp))  | Missense     | -                             | -            | Het      | NL       | US   | P        | PM2_Moderate,<br>PP3_Strong                                                                                                                                                       | ND  |

|                         |                                   |                                        |                                |                                     |                |             |      |      |       |                                                                                                              |     |
|-------------------------|-----------------------------------|----------------------------------------|--------------------------------|-------------------------------------|----------------|-------------|------|------|-------|--------------------------------------------------------------------------------------------------------------|-----|
| 56 <sup>&amp;</sup>     | <i>COL2A1</i><br>NM_001844.4      | c.1364C>T<br>(p.(Thr455Met))           | Missense<br>& splice<br>region | -                                   | -              | Het         | NL   | P    | LP    | PP1_Moderate,<br>PP3_Strong,<br>BS2_Strong                                                                   | Yes |
| 53 <sup>&amp;</sup>     | <i>COL4A3</i><br>NM_000091.3      | c.1295C>T<br>(p.(Pro432Leu))           | Missense                       | -                                   | -              | Het         | US   | P    | LP    | PS1_Supporting,<br>PM1_Moderate,<br>PM2_Moderate,<br>PP3_Supporting                                          | ND  |
| 270 <sup>&amp;</sup>    | <i>COL4A3</i><br>NM_000091.3      | c.4421T>C<br>(p.(Leu474Pro))           | Missense                       | -                                   | -              | Het         | C    | P    | LP    | PS1_Strong,<br>PM2_Moderate,<br>PP3_Supporting                                                               | ND  |
| 32 <sup>&amp;</sup>     | <i>COL4A3</i><br>NM_000091.3      | c.4882T>G<br>(p.(Ser1628Ala))          | Missense                       | -                                   | -              | Het         | US   | US   | P     | PM2_Moderate,<br>PP1_Strong,<br>PP4_Strong                                                                   | Yes |
| 279 <sup>&amp;</sup>    | <i>DIAPH1</i><br>NM_005219.4      | c.3268dup<br>(p.(Met1090Asnfs*<br>13)) | Frameshift                     | -                                   | -              | Het         | LP   | LP   | LP    | PVS1_Strong,<br>PM2_Moderate                                                                                 | ND  |
| 247 <sup>&amp;</sup>    | <i>EDNRB</i><br>NM_000115.4       | c.878dup<br>(p.(Tyr293*))              | Nonsense                       | -                                   | -              | Het         | LP   | NL   | LP    | PVS1_Strong,<br>PM2_Moderate                                                                                 | ND  |
| 120 <sup>&amp;</sup>    | <i>EYA4</i><br>NM_0013010<br>13.1 | c.1481dup<br>(p.(Glu496Argfs*4))       | Frameshift                     | -                                   | -              | Het         | NL   | NL   | LP    | PVS1_Strong,<br>PM2_Moderate                                                                                 | ND  |
| 296 <sup>&amp;,\$</sup> | <i>GJB2</i><br>NM_004004.5        | c.35del<br>(p.(Gly12Valfs*2))          | Frameshift                     | c.35del<br>(p.(Gly12Valfs*2))       | Frameshift     | Hom         | P, P | P, P | P; P  | PVS1_Strong,<br>PS3_Strong;<br>PVS1_Strong,<br>PS3_Strong                                                    | ND  |
| 297 <sup>&amp;,\$</sup> | <i>GJB2</i><br>NM_004004.5        | c.35del<br>(p.(Gly12Valfs*2))          | Frameshift                     | c.35del<br>(p.(Gly12Valfs*2))       | Frameshift     | Hom         | P, P | P, P | P; P  | PVS1_Strong,<br>PS3_Strong;<br>PVS1_Strong,<br>PS3_Strong                                                    | ND  |
| 304 <sup>&amp;,\$</sup> | <i>GJB2</i><br>NM_004004.5        | c.35del<br>(p.(Gly12Valfs*2))          | Frameshift                     | c.139G>T<br>(p.(Glu47*))            | Stop<br>gained | Comp<br>het | P, P | P, P | P; P  | PVS1_Strong,<br>PS3_Strong;<br>PVS1_Strong,<br>PS1_Strong,<br>PM2_Moderate,<br>PM3_Moderate,<br>PM5_Moderate | ND  |
| 305 <sup>&amp;,\$</sup> | <i>GJB2</i><br>NM_004004.5        | c.35del<br>(p.(Gly12Valfs*2))          | Frameshift                     | c.313_326del<br>(p.(Lys105Glyfs*5)) | Frameshift     | Comp<br>het | P, P | P, P | P; LP | PVS1_Strong,<br>PS3_Strong;<br>PVS1_Strong,<br>PM2_Moderate,<br>PM3_Moderate                                 | Yes |
| 307 <sup>&amp;,\$</sup> | <i>GJB2</i><br>NM_004004.5        | c.35del<br>(p.(Gly12Valfs*2))          | Frameshift                     | c.139G>T<br>(p.(Glu47*))            | Stop<br>gained | Comp<br>het | P, P | P, P | P; P  | PVS1_Strong,<br>PS3_Strong;<br>PVS1_Strong                                                                   | Yes |

|                         |                            |                               |            |                               |            |     |      |      |      |                                                              |     |
|-------------------------|----------------------------|-------------------------------|------------|-------------------------------|------------|-----|------|------|------|--------------------------------------------------------------|-----|
|                         |                            |                               |            |                               |            |     |      |      |      | PS1_Strong,<br>PM2_Moderate,<br>PM3_Moderate<br>PM5_Moderate |     |
| 308 <sup>&amp;,\$</sup> | <i>GJB2</i><br>NM_004004.5 | c.35del<br>(p.(Gly12Valfs*2)) | Frameshift | c.35del<br>(p.(Gly12Valfs*2)) | Frameshift | Hom | P, P | P, P | P; P | PVS1_Strong,<br>PS3_Strong;<br>PVS1_Strong,<br>PS3_Strong    | ND  |
| 309 <sup>&amp;,\$</sup> | <i>GJB2</i><br>NM_004004.5 | c.35del<br>(p.(Gly12Valfs*2)) | Frameshift | c.35del<br>(p.(Gly12Valfs*2)) | Frameshift | Hom | P, P | P, P | P; P | PVS1_Strong,<br>PS3_Strong;<br>PVS1_Strong,<br>PS3_Strong    | Yes |

|                         |                              |                                           |                |                               |                |             |           |           |        |                                                                                                                               |     |
|-------------------------|------------------------------|-------------------------------------------|----------------|-------------------------------|----------------|-------------|-----------|-----------|--------|-------------------------------------------------------------------------------------------------------------------------------|-----|
| 314 <sup>&amp;,\$</sup> | <i>GJB2</i><br>NM_004004.5   | c.35del<br>(p.(Gly12Valfs*2))             | Frameshift     | c.35del<br>(p.(Gly12Valfs*2)) | Frameshift     | Hom         | P, P,     | P, P      | P; P   | PVS1_Strong,<br>PS3_Strong;<br>PVS1_Strong,<br>PS3_Strong                                                                     | ND  |
| 90 <sup>&amp;</sup>     | <i>GJB2</i><br>NM_004004.5   | c.71G>A<br>(p.(Trp24*))                   | Stop<br>gained | c.71G>A<br>(p.(Trp24*))       | Stop<br>gained | Hom         | P, P      | P, P      | P, P   | PVS1_Strong,<br>PS3_Strong,<br>PM2_Moderate,<br>PM3_Moderate;<br>PVS1_Strong,<br>PS3_Strong,<br>PM2_Moderate,<br>PM3_Moderate | ND  |
| 302 <sup>&amp;,\$</sup> | <i>GJB2</i><br>NM_004004.5   | c.71G>A<br>(p.(Trp24*))                   | Stop<br>gained | c.71G>A<br>(p.(Trp24*))       | Stop<br>gained | Hom         | P, P      | P, P      | P; P   | PVS1_Strong,<br>PS3_Strong,<br>PM2_Moderate,<br>PM3_Moderate;<br>PVS1_Strong,<br>PS3_Strong,<br>PM2_Moderate,<br>PM3_Moderate | Yes |
| 1026                    | <i>GJB2</i><br>NM_004004.5   | c.313_326del<br>(p.(Lys105GlyfsTer5<br>)) | Frameshift     | c.35del<br>(p.(Gly12Valfs*2)) | Frameshift     | Comp<br>het | P, P      | P, P      | P, P   | PVS1_Strong,<br>PM1_Moderate,<br>PM2_Moderate,<br>PM3_Moderate;<br>PVS1_Strong,<br>PS3_Strong                                 | ND  |
| 2002                    | <i>GJB2</i><br>NM_004004.5   | c.35del<br>(p.(Gly12Valfs*2))             | Frameshift     | c.35del<br>(p.(Gly12Valfs*2)) | Frameshift     | Hom         | P, P      | P, P      | P; P   | PVS1_Strong,<br>PS3_Strong;<br>PVS1_Strong,<br>PS3_Strong                                                                     | ND  |
| 2003                    | <i>GJB2</i><br>NM_004004.5   | c.35del<br>(p.(Gly12Valfs*2))             | Frameshift     | c.35del<br>(p.(Gly12Valfs*2)) | Frameshift     | Hom         | P, P      | P, P      | P; P   | PVS1_Strong,<br>PS3_Strong;<br>PVS1_Strong,<br>PS3_Strong                                                                     | ND  |
| 2006                    | <i>GJB2</i><br>NM_004004.5   | c.35del<br>(p.(Gly12Valfs*2))             | Frameshift     | c.35del<br>(p.(Gly12Valfs*2)) | Frameshift     | Hom         | P, P      | P, P      | P; P   | PVS1_Strong,<br>PS3_Strong;<br>PVS1_Strong,<br>PS3_Strong                                                                     | ND  |
| 2001                    | KCNE1<br>NM_000219.6         | c.12dup<br>(p.(Asn5Ter)                   | Frameshift     | c.12dup<br>(p.(Asn5Ter)       | Frameshift     | Hom         | P, P      | P, P      | P, P   | PVS1_Strong,<br>PS1_Moderate,<br>PM2_Moderate;<br>PVS1_Strong,<br>PS1_Moderate,<br>PM2_Moderate                               | Yes |
| 1030                    | <i>LHFPL5</i><br>NM_182548.4 | c.526C>T<br>(p.(Arg176Cys))               | Missense       | c.526C>T<br>(p.(Arg176Cys))   | Missense       | Hom         | NL,<br>NL | US,<br>US | LP, LP | PM1_Moderate,<br>PM2_Moderate,<br>PM5_Moderate,                                                                               | ND  |

|  |  |  |  |  |  |  |  |  |  |  |                                                                                      |  |
|--|--|--|--|--|--|--|--|--|--|--|--------------------------------------------------------------------------------------|--|
|  |  |  |  |  |  |  |  |  |  |  | PP3_Supporting;<br>PM1_Moderate,<br>PM2_Moderate,<br>PM5_Moderate,<br>PP3_Supporting |  |
|--|--|--|--|--|--|--|--|--|--|--|--------------------------------------------------------------------------------------|--|

|                      |                                       |                                          |                    |                                       |                 |             |           |           |        |                                                                                                                                                              |     |
|----------------------|---------------------------------------|------------------------------------------|--------------------|---------------------------------------|-----------------|-------------|-----------|-----------|--------|--------------------------------------------------------------------------------------------------------------------------------------------------------------|-----|
| 106                  | <i>LOXHD1</i><br>NM_144612.6          | c.1904T>C<br>(p.(Leu635Pro))             | Missense           | c.2314A>T<br>(p.(Ile772Phe))          | Missense        | Comp<br>het | NL,<br>NL | LP, LP    | LP, LP | PM1_Supporting,<br>PM2_Supporting,<br>PM5_Moderate,<br>PP1_Moderate,<br>PP3_Supporting;<br>PM2_Moderate,<br>PM3_Moderate,<br>PP1_Moderate,<br>PP3_Supporting | Yes |
| 59 <sup>&amp;</sup>  | <i>LOXHD1</i><br>NM_144612.6          | c.3061+1G>A<br>(p.(?))                   | Splice<br>donor    | c.5144del<br>(p.(Asn1715Thrfs*4<br>)) | Frameshift      | Comp<br>het | P, NL     | US,<br>US | LP, LP | PVS1_Strong,<br>PM2_Moderate;<br>PVS1_Strong,<br>PM2_Moderate                                                                                                | ND  |
| 89 <sup>&amp;</sup>  | <i>LOXHD1</i><br>NM_144612.6          | c.5721T>A<br>(p.(Tyr1907*))              | Nonsense           | c.5721T>A<br>(p.(Tyr1907*))           | Nonsense        | Hom         | NL,<br>NL | US,<br>US | LP, LP | PVS1_Strong,<br>PM2_Moderate,<br>BP4_Supporting;<br>PVS1_Strong,<br>PM2_Moderate,<br>BP4_Supporting                                                          | ND  |
| 257 <sup>&amp;</sup> | <i>MARVELD2</i><br>NM_0010386<br>03.2 | c.880_890del<br>(p.(Phe294Argfs*17<br>)) | Frameshift         | c.1331+2T>C<br>(p.(?))                | Splice<br>donor | Comp<br>het | LP, LP    | LP, P     | LP, LP | PVS1_Strong,<br>PM2_Moderate,<br>PM3_Supporting;<br>PVS1_Strong,<br>PM2_Moderate,<br>PM3_Supporting                                                          | Yes |
| 2004                 | <i>MARVELD2</i><br>NM_0010386<br>03.3 | c.1331+2T>C (p.(?))                      | Splice<br>donor    | c.1331+2T>C (p.(?))                   | Splice<br>donor | Hom         | P, P      | P, P      | P, P   | PVS1_Strong,<br>PS1_Strong,<br>PM2_Moderate;<br>PVS1_Strong,<br>PS1_Strong,<br>PM2_Moderate                                                                  | ND  |
| 259 <sup>&amp;</sup> | <i>MITF</i><br>NM_0013546<br>04.1     | c.1180-2A>G<br>(p.(?))                   | Splice<br>acceptor | -                                     | -               | Het         | LP        | LP        | LP     | PVS1_Strong,<br>PM2_Moderate                                                                                                                                 | ND  |
| 1017                 | <i>MITF</i><br>NM_000248.3            | c.668G>T<br>p.Arg223Leu                  | Missense           | -                                     | -               | Het         | US        | US        | LP     | PM1_Moderate,<br>PM2_Moderate,<br>PM5_Moderate,<br>PP3_Supporting                                                                                            | ND  |

|                     |                                  |                                   |            |                               |          |             |        |           |            |                                                                                                                                         |    |
|---------------------|----------------------------------|-----------------------------------|------------|-------------------------------|----------|-------------|--------|-----------|------------|-----------------------------------------------------------------------------------------------------------------------------------------|----|
| 1018                | <i>MT-TL1</i><br>ENST00000386347 | m.3243A>G<br>p.?                  | Missense   | -                             | -        | Het pl      |        |           | N/A<br>(P) | N/A                                                                                                                                     | ND |
| 1028                | <i>MYH14</i><br>NM_001077186.1   | c.2500C>T<br>p.Arg834Cys          | Missense   | -                             | -        | Het         | NL     | US        | LP         | PM1_Moderate,<br>PM2_Moderate,<br>PP1_Supporting,<br>PP3_Supporting                                                                     | ND |
| 1029                | <i>MYH14</i><br>NM_001077186.1   | c.2500C>T<br>p.Arg834Cys          | Missense   | -                             | -        | Het         | NL     | US        | LP         | PM1_Moderate,<br>PM2_Moderate,<br>PP1_Supporting,<br>PP3_Supporting                                                                     | ND |
| 23 <sup>&amp;</sup> | <i>MYO15A</i><br>NM_016239.3     | c.1137del<br>(p.(Tyr380Metfs*64)) | Frameshift | c.8183G>A<br>(p.(Arg2728His)) | Missense | Comp<br>het | P, LP  | P, P      | P, P       | PVS1_Very strong,<br>PS1_Strong,<br>PM2_Supporting;<br>PS1_Strong,<br>PM1_Moderate,<br>PM2_Moderate,<br>PM3_Moderate                    | ND |
| 216                 | <i>MYO15A</i><br>NM_016239.3     | c.4240G>A<br>(p.(Glu1414Lys))     | Missense   | c.5491G>A<br>(p.(Gly1831Arg)) | Missense | Comp<br>het | P, NL  | P, NL     | LP, LP     | PS1_Strong,<br>PM1_Moderate,<br>PM2_Moderate,<br>PP3_Supporting;<br>PM1_Moderate,<br>PM2_Moderate,<br>PM5_Moderate,<br>PP3_Supporting   | ND |
| 99 <sup>&amp;</sup> | <i>MYO15A</i><br>NM_016239.3     | c.9620G>T<br>(p.(Arg3207Arg))     | Missense   | c.9620G>T<br>(p.(Arg3207Arg)) | Missense | Hom         | LP, LP | NL,<br>NL | LP, LP     | PM1_Supporting,<br>PM2_Moderate,<br>PM5_Strong,<br>PP3_Supporting;<br>PM1_Supporting,<br>PM2_Moderate,<br>PM5_Strong;<br>PP3_Supporting | ND |

|                         |                       |                                                         |                      |                                       |                     |             |                  |             |              |                                                                                                                                                                                                                                                  |     |
|-------------------------|-----------------------|---------------------------------------------------------|----------------------|---------------------------------------|---------------------|-------------|------------------|-------------|--------------|--------------------------------------------------------------------------------------------------------------------------------------------------------------------------------------------------------------------------------------------------|-----|
| 1031                    | MYO15A<br>NM_016239.3 | c.1721G>C;<br>p.Arg574Pro;<br>c.6580C>T<br>p.Arg2194Trp | missense<br>missense | c.6442T>A<br>p.Trp2148Arg             | Missense            | Comp<br>het | US-<br>US;<br>NL | LP-LP;<br>P | US-LP,<br>LP | PM2_Moderate,<br>PM3_Moderate,<br>PP1_Supporting,<br>BP4_Supporting;<br>PS1_Moderate,<br>PM1_Moderate,<br>PM2_Moderate,<br>PM3_Moderate,<br>PP1_Supporting,<br>BP4_Supporting;<br>PS1_Strong<br>PM1_Moderate,<br>PM2_Moderate,<br>PP3_Supporting | ND  |
| 1034                    | MYO15A<br>NM_016239.3 | c.8309_8311delAG<br>G p.Glu2770del                      | Inframe<br>deletion  | c.8309_8311delAG<br>G p.Glu2770del    | Inframe<br>deletion | Hom         | LP; LP           | NL;<br>NL   | LP, LP       | PM1_Moderate,<br>PM2_Moderate,<br>PM3_Moderate,<br>PM4_Moderate,<br>PP3_Supporting                                                                                                                                                               | ND  |
| 1015                    | MYO3A<br>NM_017433.4  | c.732-2A>C p.?                                          | Splice<br>acceptor   | -                                     | -                   | Het         | NL               | US          | LP           | PVS1_Strong,<br>PM2_Moderate                                                                                                                                                                                                                     | ND  |
| 181 <sup>&amp;</sup>    | MYO6<br>NM_004999.3   | c.866_869del<br>(p.(Lys289Argfs*17)<br>)                | Frameshift           | -                                     | -                   | Het         | NL <sup>#</sup>  | P           | LP           | PVS1_Strong,<br>PM2_Moderate                                                                                                                                                                                                                     | ND  |
| 1024                    | MYO6<br>NM_004999.3   | Deletion Exon 10-34                                     | Partial<br>deletion  | -                                     | -                   | Het         | -                | -           | P            | N/A                                                                                                                                                                                                                                              | ND  |
| 153                     | MYO7A<br>NM_000260.3  | c.1792G>A<br>(p.(Ala598Thr))                            | Missense             | -                                     | -                   | Het         | NL               | US          | LP           | PM1_Moderate,<br>PM2_Moderate,<br>PM5_Supporting,<br>PP1_Supporting                                                                                                                                                                              | Yes |
| 1016                    | MYO7A<br>NM_000260.3  | c.5886_5888delCTT<br>p.Phe1963del                       | Inframe_<br>deletion | -                                     | -                   | Het         | P                | NL          | LP           | PS1_Strong,<br>PM1_Moderate,<br>PM2_Moderate,<br>PP3_Supporting                                                                                                                                                                                  | ND  |
| 1033                    | MYO7A<br>NM_000260.3  | c.4264_4267dupAT<br>CA<br>p.Thr1423AsnfsTer2<br>9       | Frameshift           | c.6445dupC<br>p.Leu2149ProfsTer<br>44 | Frameshift          | Comp<br>het | NL               | NL          | P            | PVS1_Very strong,<br>PM2_Moderate,<br>PM3_Moderate,<br>PP1_Supporting;<br>PVS1_Very strong,<br>PM2_Moderate,<br>PM3_Moderate,<br>PP1_Supporting                                                                                                  | ND  |
| 299 <sup>&amp;,\$</sup> | OTOF<br>NM_194248.2   | c.2719C>T<br>(p.(Gln907*))                              | Nonsense             | c.5203C>T<br>(p.(Arg1735Trp))         | Missense            | Comp<br>het | NL <sup>#</sup>  | NL          | LP; P        | PVS1_Strong,<br>PM2_Moderate,<br>PM3_Moderate;                                                                                                                                                                                                   | Yes |



|                     |                                    |                             |                           |                              |          |             |           |           |        |                                                                                                                                                               |    |
|---------------------|------------------------------------|-----------------------------|---------------------------|------------------------------|----------|-------------|-----------|-----------|--------|---------------------------------------------------------------------------------------------------------------------------------------------------------------|----|
|                     |                                    |                             |                           |                              |          |             |           |           |        | PS1_Strong,<br>PM2_Moderate,<br>PM5_Moderate,<br>PP3_Supporting                                                                                               |    |
| 51 <sup>&amp;</sup> | <i>PAX3</i><br>NM_181459.3         | c.167G>T<br>(p.(Arg56Leu))  | Frameshift                | -                            | -        | Het         | P         | P         | LP     | PS1_Moderate,<br>PM2_Moderate,<br>PM5_Moderate<br>PP3_Supporting                                                                                              | ND |
| 1003                | <i>PAX3</i><br>NM_181457.3         | c.187G>A<br>p.Ala63Thr      | Missense                  | -                            | -        | Het         | NL        | NL        | LP     | PM1_Moderate,<br>PM2_Moderate,<br>PP3_Supporting,<br>PP4_Supporting                                                                                           | ND |
| 1014                | <i>POU3F4</i><br>NM_000307.4       | Deletion entire<br>gene p.? | Deletion                  | -                            | -        | Hemi        |           |           | P      | N/A                                                                                                                                                           | ND |
| 1023                | <i>POU4F3</i><br>NM_002700.3       | c.118C>T<br>p.Gln40Ter      | Splice<br>stop_<br>gained | -                            | -        | Het         | LP        | LP        | LP     | PVS1_Strong,<br>PM2_Moderate                                                                                                                                  | ND |
| 1027                | <i>PTPRQ</i><br>NM_0011450<br>26.2 | c.6475C>T<br>p.Arg2159Ter   | Nonsense                  | c.6475C>T<br>p.Arg2159Ter    | Nonsense | Hom         | P, P      | NL,<br>NL | P, P   | PVS1_Strong,<br>PS1_Strong,<br>PM2_Moderate;<br>PVS1_Strong,<br>PS1_Strong,<br>PM2_Moderate                                                                   | ND |
| 2005                | <i>RRM2B</i><br>NM_015713.5        | c.846G>C<br>(p.(Met282Ile)) | Missense                  | c.361C>T<br>(p.(Arg121Cys))  | Missense | Comp<br>het | NL,<br>NL | NL,<br>NL | LP, LP | PS1_Strong,<br>PM2_Moderate,<br>PP3_Supporting;<br>PM1_Moderate,<br>PM2_Moderate,<br>PM3_Moderate,<br>PM5_Moderate,<br>PP3_Supporting                         | ND |
| 74 <sup>&amp;</sup> | <i>SLC26A4</i><br>NM_000441.1      | c.703C>T<br>(p.(Gln235*))   | Nonsense                  | c.1280C>A<br>(p.(Ser427Tyr)) | Missense | Comp<br>het | NL,<br>NL | NL,<br>NL | P, LP  | PVS1_Strong,<br>PM2_Moderate,<br>PM3_Moderate,<br>PP3_Supporting,<br>PP4_Supporting;<br>PM2_Moderate,<br>PM3_Supporting,<br>PP3_Supporting,<br>PP4_Supporting | ND |

|                      |                               |                                 |                 |                              |          |             |       |      |        |                                                                                                                                                                           |    |
|----------------------|-------------------------------|---------------------------------|-----------------|------------------------------|----------|-------------|-------|------|--------|---------------------------------------------------------------------------------------------------------------------------------------------------------------------------|----|
| 278 <sup>&amp;</sup> | <i>SLC26A4</i><br>NM_000441.1 | c.707T>C<br>(p.(Leu236Pro))     | Missense        | c.2145G>T<br>(p.(Lys715Asn)) | Missense | Comp<br>het | P, LP | P, P | P, LP  | PS1_Strong,<br>PM1_Moderate,<br>PM2_Supporting,<br>PM5_Moderate,<br>PP3_Supporting;<br>PS1_Strong,<br>PM1_Moderate,<br>PM2_Supporting,<br>PM3_Moderate,<br>BP4_Supporting | ND |
| 65 <sup>&amp;</sup>  | <i>SLC26A4</i><br>NM_000441.1 | c.1001+1G>A<br>(p.(?))          | Splice<br>donor | c.2219G>T<br>(p.(Gly740Val)) | Missense | Comp<br>het | P, US | P, P | LP, LP | PVS1_Strong,<br>PM2_Supporting,<br>PM3_Moderate,<br>PP4_Supporting;<br>PM2_Supporting,<br>PM3_Moderate,<br>PP4_Supporting                                                 | ND |
| 41 <sup>&amp;</sup>  | <i>SMPX</i><br>NM_014332.2    | c.140del<br>(p.(Pro47Leufs*34)) | Frameshift      | -                            | -        | Hemi        | NL    | NL   | LP     | PVS1_Strong,<br>PM2_Moderate                                                                                                                                              | ND |
| 2000                 | <i>SMPX</i><br>NM_014332.3    | c.127G>T<br>(p.(Glu43Ter))      | Missense        | -                            | -        | Hemi        | NL    | NL   | LP     | PVS1_Strong,<br>PM2_Moderate                                                                                                                                              | ND |
| 88 <sup>&amp;</sup>  | <i>SOX10</i><br>NM_006941.3   | c.570C>A<br>(p.(Cys190*))       | Stop<br>gained  | -                            | -        | Het         | NL    | P    | P      | PVS1_Strong,<br>PM2_Moderate,<br>PP4_Supporting                                                                                                                           | ND |
| 202 <sup>&amp;</sup> | <i>TFAP2A</i><br>NM_003220.2  | c.9G>A<br>(p.(Trp3*))           | Nonsense        | -                            | -        | Het         | NL    | NL   | LP     | PVS1_Strong,<br>PM2_Moderate                                                                                                                                              | ND |

|                       |                               |                                 |                                  |                             |          |             |       |       |        |                                                                                                                                                                                                             |     |
|-----------------------|-------------------------------|---------------------------------|----------------------------------|-----------------------------|----------|-------------|-------|-------|--------|-------------------------------------------------------------------------------------------------------------------------------------------------------------------------------------------------------------|-----|
| 265 <sup>&amp;</sup>  | <i>TMIE</i><br>NM_147196.2    | c.250C>T<br>(p.(Arg84Trp))      | Missense                         | c.250C>T<br>(p.(Arg84Trp))  | Missense | Hom         | P, P  | P, P  | LP, LP | PS1_Moderate,<br>PM2_Moderate,<br>PM5_Moderate,<br>PP3_Supporting;<br>PS1_Moderate,<br>PM2_Moderate,<br>PM5_Moderate,<br>PP3_Supporting                                                                     | Yes |
| 83*, <sup>&amp;</sup> | <i>TMPRSS3</i><br>NM_024022.2 | c.208del<br>(p.(His70Thrfs*19)) | Frameshift<br>& splice<br>region | c.413C>A<br>(p.(Ala138Glu)) | Missense | Comp<br>het | P, P  | P, P  | LP, LP | PVS1_Strong,<br>PM2_Supporting,<br>PM5_Moderate;<br>PS1_Strong,<br>PM2_Moderate,<br>PP3_Supportin                                                                                                           | Yes |
| 232<br>(FM<br>83)     | <i>TMPRSS3</i><br>NM_024022.2 | c.208del<br>(p.(His70Thrfs*19)) | Frameshift<br>& splice<br>region | c.413C>A<br>(p.(Ala138Glu)) | Missense | Comp<br>het | P, P  | P, P  | LP, LP | PVS1_Strong,<br>PM2_Supporting,<br>PM5_Moderate;<br>PS1_Strong,<br>PM2_Moderate,<br>PP3_Supporting                                                                                                          | Yes |
| 1036                  | <i>TMPRSS3</i><br>NM_024022.3 | c.413C>A<br>p.Ala138Glu         | Missense                         | c.307G>A<br>p.Asp103Asn     | Missense | Comp<br>het | P, NL | P, NL | P, LP  | PS1_Strong,<br>PM1_Moderate,<br>PM2_Supporting,<br>PM3_Moderate,<br>PP1_Moderate,<br>PP3_Supporting;<br>PM1_Moderate,<br>PM2_Moderate,<br>PM3_Moderate,<br>PM5_Moderate,<br>PP3_Supporting                  | ND  |
| 1035                  | <i>TMPRSS3</i><br>NM_024022.3 | c.413C>A<br>p.Ala138Glu         | Missense                         | c.413C>A<br>p.Ala138Glu     | Missense | Hom         | P, P  | P, P  | P, P   | PS1_Strong,<br>PM1_Moderate,<br>PM2_Supporting,<br>PM3_Moderate,<br>PP1_Moderate,<br>PP3_Supporting;<br>PS1_Strong,<br>PM1_Moderate,<br>PM2_Supporting,<br>PM3_Moderate,<br>PP1_Moderate,<br>PP3_Supporting | ND  |
| 55 <sup>&amp;</sup>   | <i>TMPRSS3</i><br>NM_024022.2 | c.413C>A<br>(p.(Ala138Glu))     | Missense                         | c.965C>A<br>(p.(Pro322His)) | Missense | Comp<br>het | P, NL | P, NL | LP, LP | PS1_Strong,<br>PM2_Moderate,<br>PP3_Supporting;<br>PM2_Moderate,                                                                                                                                            | ND  |

|  |  |  |  |  |  |  |  |  |  |  |                               |  |
|--|--|--|--|--|--|--|--|--|--|--|-------------------------------|--|
|  |  |  |  |  |  |  |  |  |  |  | PM3_Moderate,<br>PP3_Moderate |  |
|--|--|--|--|--|--|--|--|--|--|--|-------------------------------|--|

|                      |                                   |                              |                |                             |                |             |           |           |        |                                                                                                                                                                                                 |    |
|----------------------|-----------------------------------|------------------------------|----------------|-----------------------------|----------------|-------------|-----------|-----------|--------|-------------------------------------------------------------------------------------------------------------------------------------------------------------------------------------------------|----|
| 268                  | <i>TMPRSS3</i><br>NM_024022.2     | c.496C>T<br>(p.(Arg166Trp))  | Missense       | c.753G>C<br>(p.(Trp251Cys)) | Missense       | Comp<br>het | US, P     | US, P     | LP, P  | PM1_Supporting,<br>PM2_Supporting,<br>PM3_Moderate,<br>PP4_Supporting<br>BP4_Supporting;<br>PS1_Strong,<br>PM1_Moderate,<br>PM2_Moderate,<br>PM5_Moderate,<br>PP3_Supporting,<br>PP4_Supporting | ND |
| 1032                 | <i>USH2A</i><br>NM_206933.2       | c.1036A>C<br>p.Asn346His     | Missense       | c.949C>A<br>p.Arg317=       | Synonymo<br>us | Het         | P, P      | P, P      | P, LP  | PS1_Strong,<br>PM1_Moderate,<br>PM2_Moderate,<br>PM3_Moderate,<br>PP3_Supporting,<br>PP4_Supporting;<br>PS1_Strong,<br>PM2_Moderate,<br>PM3_Moderate,<br>PP4_Supporting,<br>BP4_Supporting      | ND |
| 271 <sup>&amp;</sup> | <i>USH2A</i><br>NM_206933.2       | c.5118G>A<br>(p.(Trp1706*))  | Stop<br>gained | c.5118G>A<br>(p.(Trp1706*)) | Stop<br>gained | Hom         | P, P      | P, P      | LP, LP | PVS1_Strong,<br>PM2_Moderate;<br>PVS1_Strong,<br>PM2_Moderate                                                                                                                                   | ND |
| 1005                 | <i>USH2A</i><br>NM_206933.2       | c.10058C>T<br>p.Pro3353Leu   | Missense       | c.14519T>C<br>p.Leu4840Pro  | Missense       | Het         | NL,<br>US | LB,<br>US | LP, LP | PM1_Supporting,<br>PM2_Moderate,<br>PM3_Moderate,<br>PP4_Supporting;<br>PS1_Moderate,<br>PM1_Supporting,<br>PM2_Supporting,<br>PP3_Supporting,<br>PP4_Supporting                                | ND |
| 197 <sup>&amp;</sup> | <i>WFS1</i><br>NM_0011458<br>53.1 | c.1316T>G<br>(p.(Phe439Cys)) | Missense       | -                           | -              | Het         | LP        | P         | LP     | PS1_Strong,<br>PM1_Moderate,<br>PP3_Supporting                                                                                                                                                  | ND |
| 148 <sup>&amp;</sup> | <i>WFS1</i><br>NM_006005.3        | c.2054G>A<br>(p.(Arg685His)) | Missense       | -                           | -              | Het         | US        | US        | LP     | PS1_Strong,<br>PM2_Moderate,<br>PM5_Moderate,<br>PP3_Supporting                                                                                                                                 | ND |
| 1022                 | <i>WFS1</i><br>NM_0011458         | c.2359G>A<br>(p.(Ala787Thr)) | Missense       | -                           | -              | Het         | C         | LP        | LP     | PS1_Moderate,<br>PM1_Moderate,<br>PM2_Moderate,<br>BP4_Supporting                                                                                                                               | ND |

|  |                      |  |  |  |  |  |  |  |  |  |  |  |
|--|----------------------|--|--|--|--|--|--|--|--|--|--|--|
|  | 53.1/NM_006<br>005.3 |  |  |  |  |  |  |  |  |  |  |  |
|--|----------------------|--|--|--|--|--|--|--|--|--|--|--|

Abbreviations (in alphabetical order):

ACMG/AMP, American College of Medical Genetics and Genomics and the Association for Molecular Pathology; B, benign; C, conflicting interpretations of pathogenicity; Comp het, compound heterozygous; D, deleterious; DC, disease causing; Del, deletion; DVD, Deafness Variation Database; F, female; Het, heterozygous; Hom, homozygous; LB, likely benign; LP, likely pathogenic; M, male; MT, MutationTaster; N/A, not applicable; ND, not determined; NL, not listed; NS, not scored; P, pathogenic; PoD, possibly pathogenic; Poly, polymorphism; PP2, PolyPhen-2; PrD, probably pathogenic; Seg, segregation testing; T, tolerated; US, uncertain significance; XL, X-linked; Zyg, zygosity.

A question mark represents uncertainty about compound heterozygosity.

§ according to American College of Medical Genetics (ACMG)/Association for Molecular Pathology (AMP) guideline criteria (Oza et al. 2018; Richards et al. 2015)

\* Index patient of a family; other family members are listed in this table, labeled as family member (fm) next to the ID of the index patient.

# Variant is not listed in ClinVar but linked to dbSNP. The variant type is named after the DVD (Azaiez et al. 2018) or according to VarSome.com (Kopanos et al. 2019) for variants that were not listed in the DVD.

§ Causal variants derived from single-gene analysis.

& Patient has been previously reported (Tropitzsch et al. 2021)

## REFERENCES

Azaiez, H., Booth, K. T., Ephraim, S. S., et al. (2018). Genomic Landscape and Mutational Signatures of Deafness-Associated Genes. *Am J Hum Genet*, 103, 484-497.

Kopanos, C., Tsiolkas, V., Kouris, A., et al. (2019). VarSome: The human genomic variant search engine. *Bioinformatics*, 35, 1978–1980.

Oza, A. M., DiStefano, M. T., Hemphill, S. E., et al. (2018). Expert specification of the ACMG/AMP variant interpretation guidelines for genetic hearing loss. *Hum Mutat*, 39, 1593-1613.

Richards, S., Aziz, N., Bale, S., et al. (2015). Standards and guidelines for the interpretation of sequence variants: a joint consensus recommendation of the American College of Medical Genetics and Genomics and the Association for Molecular Pathology. *Genet Med*, 17, 405-424.

Tropitzsch, A., Schade-Mann, T., Gamerdinger, P., et al. (2021). Diagnostic Yield of Targeted Hearing Loss Gene Panel Sequencing in a Large German Cohort With a Balanced Age Distribution from a Single Diagnostic Center: An Eight-year Study. *Ear Hear*.
