# Supplementary material for: Variability in Cochlear Implantation Outcomes in a Large German Cohort With a Genetic Etiology of Hearing Loss
Source: PubMed Central journal article supplement — Ear Hear. 2023 Jul 13;44(6):1464–84. doi: 10.1097/AUD.0000000000001386 (PMC10583923; doi:10.1097/aud.0000000000001386), 2023-07-13
Supplement: aud-44-1464-s004.pdf [file aud-44-1464-s004.pdf]

|     |                         | <b>x axis</b>                                                   |                                              |
|-----|-------------------------|-----------------------------------------------------------------|----------------------------------------------|
|     | <b>gene cat.</b>        | Neural (16)<br>Structural (26)<br>HC (31)<br>SV (1)<br>Mito (2) | Neural<br>Structural<br>HC<br>SV<br>Mito     |
|     | <b>Inheritance</b>      | AR (25)<br>AD (14)<br>sporadic (35)<br>x-linked (2)             | AR<br>AD<br>sporadic<br>x-linked             |
|     | <b>impl age (IA)</b>    | 0-2 (14)<br>3-6 (7)<br>7-20 (16)<br>21-60 (32)<br>> 60 (7)      | 0-2<br>3-6<br>7-20<br>21-60<br>> 60          |
|     | <b>onset (O)</b>        | congenital (35)<br>peri-lingual (13)<br>post-lingual (28)       | congenital<br>peri-lingual<br>post-lingual   |
|     | <b>gap O / IA</b>       | <=2 (15)<br>3-5 (6)<br>6-10 (9)<br>>10 (46)                     | <=2<br>3-5<br>6-10<br>>10                    |
| WHO |                         |                                                                 |                                              |
| 4   | <b>hearing loss</b>     | severe (4)                                                      | severe                                       |
| 5   | alle Ohren              | profound (16)                                                   | profound                                     |
| 6   |                         | complete (56)                                                   | complete                                     |
|     | <b>laterality</b>       | unilateral (4)<br>asymmetric (2)<br>bilateral sym. (70)         | unilateral<br>asymmetric<br>bilateral sym.   |
|     | <b>sequence of impl</b> | single ear (29)<br>1st or 2nd ear (15)<br>simultaneous (32)     | single ear<br>1st or 2nd ear<br>simultaneous |

SPSS 27

KS-Test for :

| Median 65  | number | total median | neu          | p 0.05 |
|------------|--------|--------------|--------------|--------|
| both sides |        |              |              |        |
| 42.5       | 16     | 65           | n.s.         |        |
| 80         | 26     | 65           | n.s.         |        |
| 65         | 31     | 65           | n.s.         |        |
| 80         | 1      | 65           | n.s.         |        |
| 77.5       | 2      | 65           | n.s.         |        |
|            |        | 65           |              |        |
| 60         | 25     | 65           | n.s.         |        |
| 70         | 14     | 65           | n.s.         |        |
| 65         | 35     | 65           | n.s.         |        |
| 56.25      | 2      | 65           | n.s.         |        |
|            |        | 65           |              |        |
| 80         | 14     | 65           | n.s.         |        |
| 85         | 7      | 65           | <b>0.047</b> |        |
| 50         | 16     | 65           | n.s.         |        |
| 55         | 32     | 65           | n.s.         |        |
| 65         | 7      | 65           | n.s.         |        |
|            |        | 65           |              |        |
| 75         | 35     | 65           | n.s.         |        |
| 65         | 13     | 65           | n.s.         |        |
| 60         | 28     | 65           | n.s.         |        |
|            |        | 65           |              |        |
| 80         | 15     | 65           | n.s.         |        |
| 85         | 6      | 65           | <b>0.011</b> |        |
| 67.5       | 9      | 65           | n.s.         |        |
| 53.75      | 46     | 65           | n.s.         |        |
|            |        | 65           |              |        |
| 42.50      | 4      | 65           | n.s.         |        |
| 53.75      | 16     | 65           | n.s.         |        |
| 70.00      | 56     | 65           | n.s.         |        |
|            |        | 65           |              |        |
| 0          | 4      | 65           | n.s.         |        |
| 62.5       | 2      | 65           | n.s.         |        |
| 68.75      | 70     | 65           | n.s.         |        |
|            |        | 65           |              |        |
| 55         | 29     | 65           | n.s.         |        |
| 68.75      | 15     | 65           | n.s.         |        |
| 80         | 32     | 65           | n.s.         |        |

2 samples

p n.s.

0.091

0.527

0.992

0.745

0.653

0.698

0.767

0.933

0.653

0.055

0.349

0.385

0.811

0.459

0.926

0.573

0.215

0.970

0.427

0.552

0.431

0.956

0.065

0.990

1.000

0.251

1.000

0.091

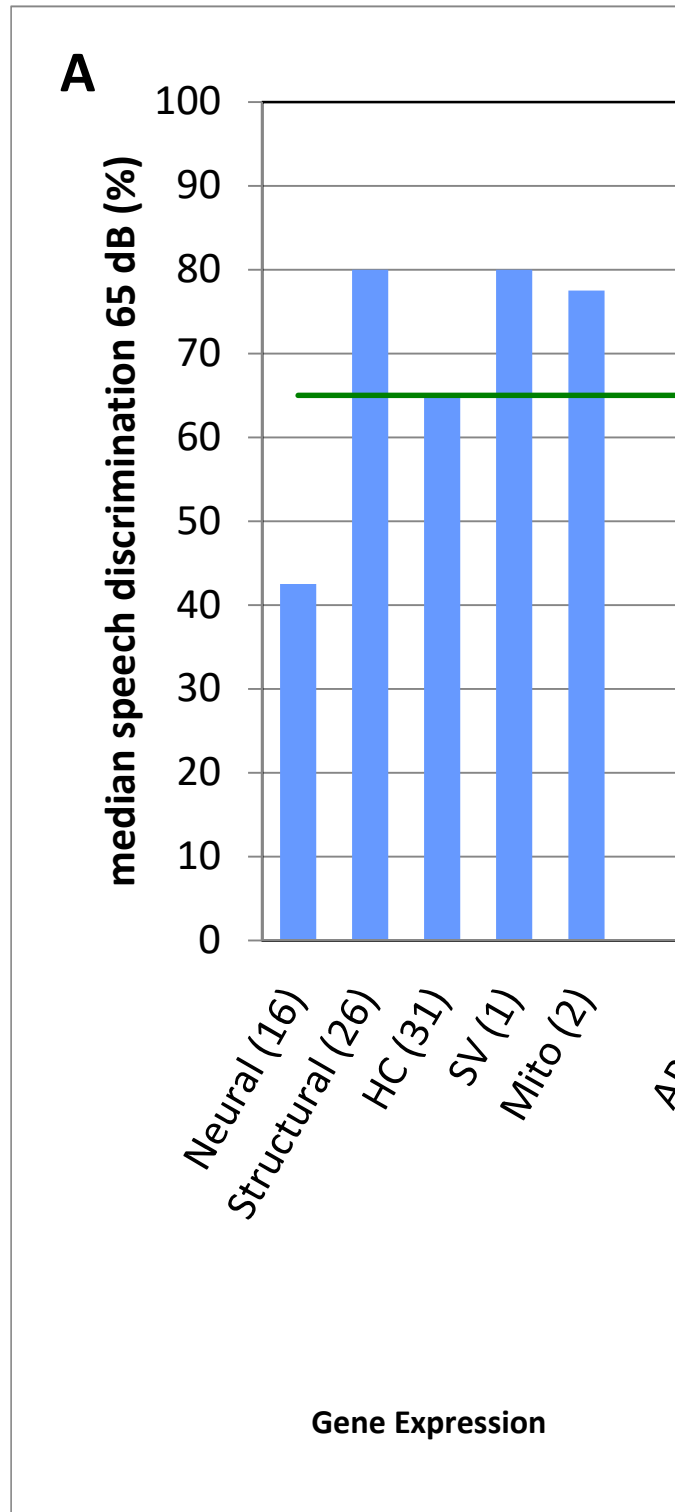

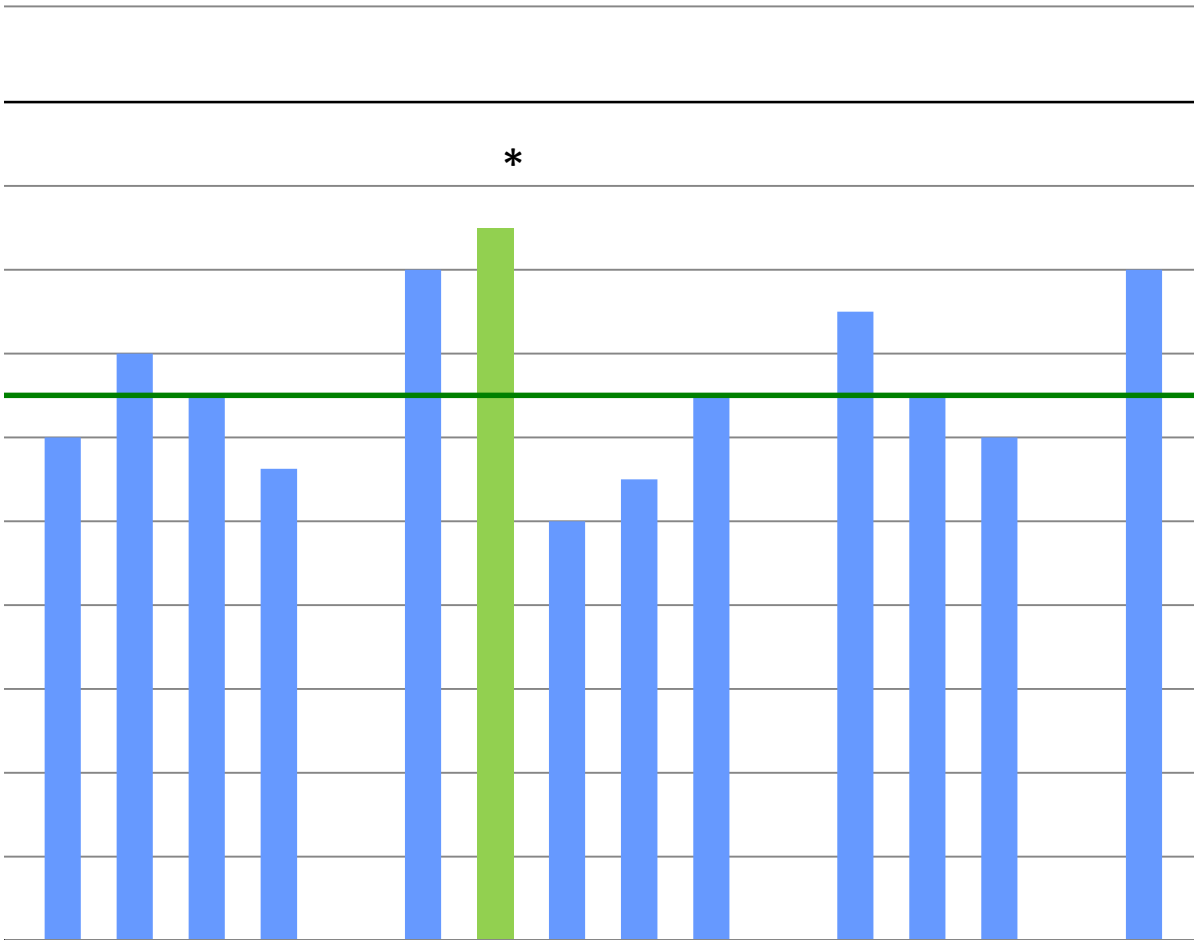

AD (25)  
 AD (14)  
 sporadic (35)  
 x-linked (2)

0-2 (14)  
 3-6 (7)  
 7-20 (16)  
 21-60 (32)  
 > 60 (7)

congenital (35)  
 peri-lingual (13)  
 post-lingual (28)

≤2 (15)  
 3-5 (15)

**Inheritance**  
 (Family History)

**age at implantation**

**Onset of**  
**Hearing loss (HL)**

**Delay**  
**Onset-**

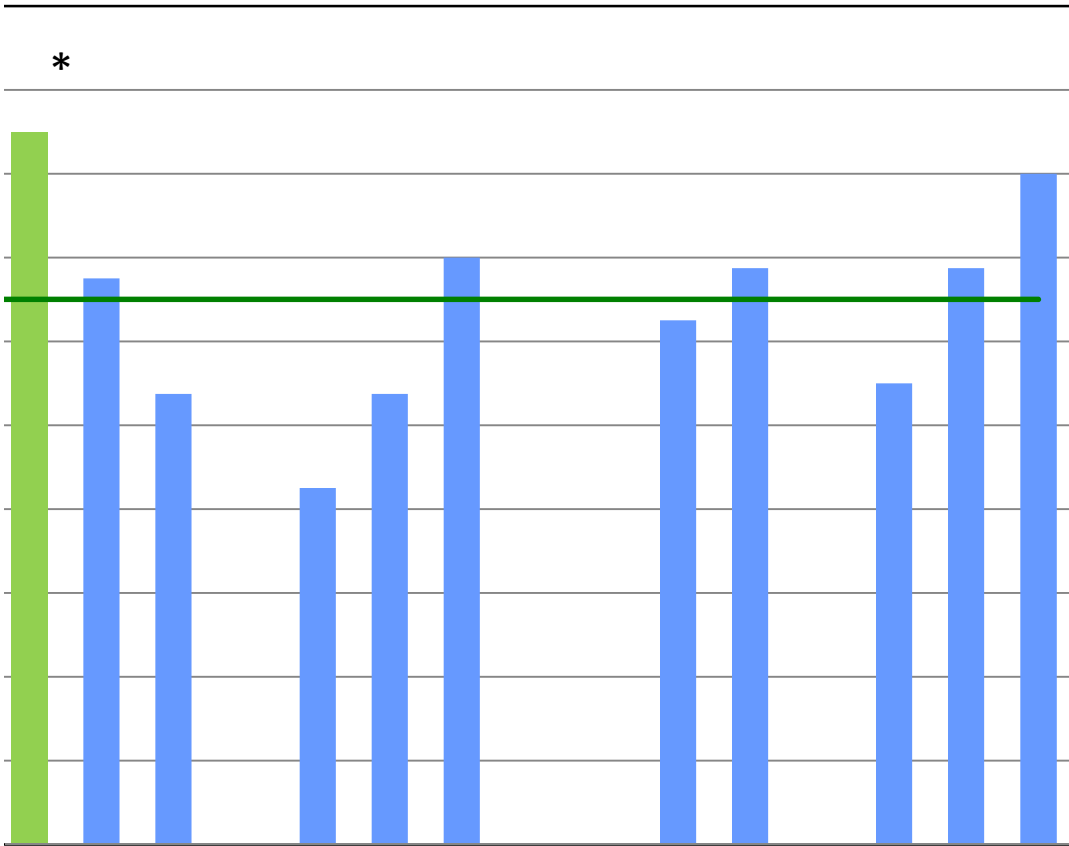

y (years) HL-  
- Implantation

Grades of  
Hearing loss

Laterality of  
Hearing loss

Sequence of  
Implantation

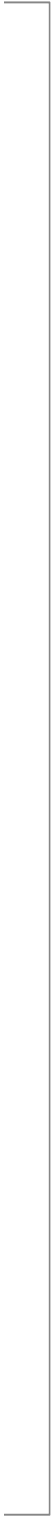

















|







































| neural_genes | other_genes | age0_6 | age_gt6 | congenital | pre-post_ling |
|--------------|-------------|--------|---------|------------|---------------|
| 52.50        | 97.50       | 100.00 | 90.00   | 50.00      | 0.00          |
| 0.00         | 50.00       | 100.00 | 0.00    | 80.00      | 50.00         |
| 55.00        | 97.50       | 95.00  | 97.50   | 95.00      | 50.00         |
| 0.00         | 97.50       | 60.00  | 50.00   | 85.00      | 70.00         |
| 95.00        | 60.00       | 50.00  | 67.50   | 55.00      | 80.00         |
| 50.00        | 67.50       | 82.50  | 22.50   | 50.00      | 90.00         |
| 45.00        | 70.00       | 62.50  | 27.50   | 30.00      | 65.00         |
| 65.00        | 75.00       | 80.00  | 0.00    | 0.00       | 67.50         |
| 92.50        | 72.50       | 75.00  | 80.00   | 60.00      | 70.00         |
| 7.50         | 60.00       | 80.00  | 52.50   | 100.00     | 65.00         |
| 32.50        | 70.00       | 95.00  | 50.00   | 50.00      | 0.00          |
| 0.00         | 70.00       | 70.00  | 70.00   | 55.00      | 97.50         |
| 0.00         | 20.00       | 80.00  | 30.00   | 85.00      | 40.00         |
| 40.00        | 62.50       | 92.50  | 50.00   | 52.50      | 62.50         |
| 40.00        | 50.00       | 85.00  | 50.00   | 70.00      | 85.00         |
| 75.00        | 55.00       | 0.00   | 85.00   | 80.00      | 60.00         |
|              | 22.50       | 80.00  | 65.00   | 80.00      | 72.50         |
|              | 12.50       | 85.00  | 70.00   | 82.50      | 0.00          |
|              | 50.00       | 85.00  | 55.00   | 62.50      | 50.00         |
|              | 50.00       | 85.00  | 32.50   | 100.00     | 97.50         |
|              | 80.00       | 87.50  | 50.00   | 95.00      | 72.50         |
|              | 85.00       |        | 80.00   | 92.50      | 80.00         |
|              | 65.00       |        | 65.00   | 85.00      | 85.00         |
|              | 50.00       |        | 55.00   | 80.00      | 17.50         |
|              | 65.00       |        | 22.50   | 22.50      | 60.00         |
|              | 35.00       |        | 72.50   | 20.00      | 32.50         |
|              | 30.00       |        | 0.00    | 97.50      | 12.50         |
|              | 75.00       |        | 97.50   | 75.00      | 75.00         |
|              | 80.00       |        | 97.50   | 85.00      | 0.00          |
|              | 70.00       |        | 20.00   | 75.00      | 70.00         |
|              | 85.00       |        | 60.00   | 80.00      | 52.50         |
|              | 75.00       |        | 72.50   | 22.50      | 7.50          |
|              | 0.00        |        | 7.50    | 87.50      | 65.00         |
|              | 60.00       |        | 75.00   | 50.00      | 40.00         |
|              | 72.50       |        | 60.00   | 27.50      | 0.00          |
|              | 85.00       |        | 0.00    |            | 75.00         |
|              | 100.00      |        | 50.00   |            | 45.00         |



|        |       |       |
|--------|-------|-------|
| 85.00  | 55.00 | 55.00 |
| 17.50  | 75.00 | 35.00 |
| 55.00  | 0.00  | 70.00 |
| 90.00  | 85.00 | 70.00 |
| 80.00  | 40.00 |       |
| 80.00  | 75.00 |       |
| 70.00  | 35.00 |       |
| 52.50  | 70.00 |       |
| 85.00  | 17.50 |       |
| 80.00  | 52.50 |       |
| 80.00  | 40.00 |       |
| 82.50  | 45.00 |       |
| 62.50  | 80.00 |       |
| 0.00   | 62.50 |       |
| 100.00 | 70.00 |       |
| 95.00  | 70.00 |       |
| 50.00  | 65.00 |       |
| 22.50  | 12.50 |       |
| 87.50  |       |       |
| 27.50  |       |       |
| 80.00  |       |       |
| 70.00  |       |       |
| 85.00  |       |       |



| gap0_5 | gap_gt5 | 1+2_ears | simult_ears |
|--------|---------|----------|-------------|
| 95.00  | 50.00   | 45.00    | 70.00       |
| 60.00  | 0.00    | 60.00    | 95.00       |
| 100.00 | 55.00   | 65.00    | 80.00       |
| 50.00  | 85.00   | 60.00    | 82.50       |
| 70.00  | 0.00    | 30.00    | 62.50       |
| 80.00  | 70.00   | 0.00     | 0.00        |
| 80.00  | 70.00   | 75.00    | 100.00      |
| 82.50  | 67.50   | 70.00    | 100.00      |
| 62.50  | 97.50   | 0.00     | 95.00       |
| 0.00   | 70.00   | 70.00    | 60.00       |
| 100.00 | 97.50   | 20.00    | 50.00       |
| 95.00  | 72.50   | 40.00    | 80.00       |
| 92.50  | 62.50   | 0.00     | 85.00       |
| 80.00  | 45.00   | 55.00    | 85.00       |
| 75.00  | 60.00   | 0.00     | 80.00       |
| 85.00  | 0.00    | 35.00    |             |
| 90.00  | 97.50   | 55.00    |             |
| 85.00  | 17.50   | 50.00    |             |
| 85.00  | 80.00   | 70.00    |             |
| 80.00  | 7.50    | 55.00    |             |
| 87.50  | 12.50   | 90.00    |             |
|        | 80.00   | 65.00    |             |
|        | 35.00   | 85.00    |             |
|        | 55.00   | 50.00    |             |
|        | 65.00   | 50.00    |             |
|        | 60.00   | 70.00    |             |
|        | 72.50   | 75.00    |             |
|        | 32.50   | 50.00    |             |
|        | 50.00   | 85.00    |             |
|        | 30.00   | 22.50    |             |
|        | 0.00    | 97.50    |             |
|        | 40.00   | 40.00    |             |
|        | 55.00   | 50.00    |             |
|        | 52.50   | 27.50    |             |
|        | 75.00   | 52.50    |             |
|        | 52.50   | 22.50    |             |
|        | 65.00   | 87.50    |             |

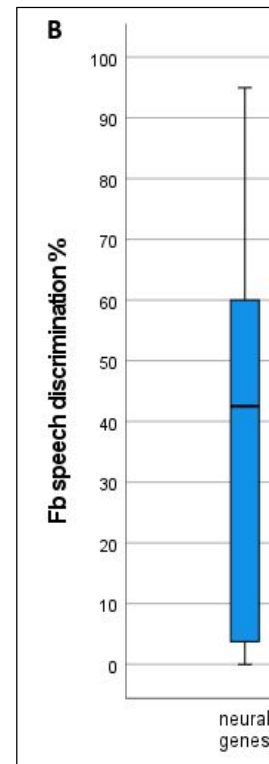

**SPSS 27**

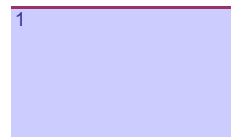

a. The significance level is

b. Asymptotic significance

Sample 1-Sample 2

neural genes-other genes

age gt 6-age 0-6

|       |       |
|-------|-------|
| 75.00 | 97.50 |
| 65.00 | 80.00 |
| 22.50 | 85.00 |
| 0.00  | 12.50 |
| 70.00 | 7.50  |
| 85.00 | 17.50 |
| 50.00 | 80.00 |
| 20.00 | 72.50 |
| 50.00 | 70.00 |
| 70.00 | 80.00 |
| 80.00 | 80.00 |
| 40.00 | 32.50 |
| 75.00 | 75.00 |
| 50.00 | 92.50 |
| 22.50 | 0.00  |
| 50.00 | 97.50 |
| 85.00 | 50.00 |
| 27.50 | 72.50 |
|       | 62.50 |
|       | 85.00 |
|       | 75.00 |
|       | 52.50 |
|       | 67.50 |
|       | 65.00 |

|                               |
|-------------------------------|
| pre-post-lingual-congenital   |
| gap gt 5-gap 0-5              |
| 1-2 ears-simult ears          |
| neural genes-gap 0-5          |
| neural genes-age 0-6          |
| age gt 6-gap 0-5              |
| gap gt 5-age 0-6              |
| pre-post-lingual-gap 0-5      |
| pre-post-lingual-age 0-6      |
| 1-2 ears-gap 0-5              |
| 1-2 ears-age 0-6              |
| neural genes-simult ears      |
| gap gt 5-simult ears          |
| age gt 6-simult ears          |
| neural genes-congenital       |
| pre-post-lingual-simult ears  |
| gap gt 5-congenital           |
| age gt 6-congenital           |
| gap gt 5-other genes          |
| age gt 6-other genes          |
| other genes-gap 0-5           |
| other genes-age 0-6           |
| neural genes-gap gt 5         |
| neural genes-age gt 6         |
| neural genes-pre-post-lingual |
| neural genes-1-2 ears         |
| gap gt 5-age gt 6             |
| gap gt 5-pre-post-lingual     |
| gap gt 5-1-2 ears             |
| age gt 6-pre-post-lingual     |
| age gt 6-1-2 ears             |
| pre-post-lingual-1-2 ears     |
| pre-post-lingual-other genes  |

1-2 ears-other genes

1-2 ears-congenital

other genes-congenital

other genes-simult ears

congenital-simult ears

congenital-age 0-6

congenital-gap 0-5

simult ears-age 0-6

simult ears-gap 0-5

age 0-6-gap 0-5

Each row tests the null hyp

Asymptotic significances (

a. Significance values hav

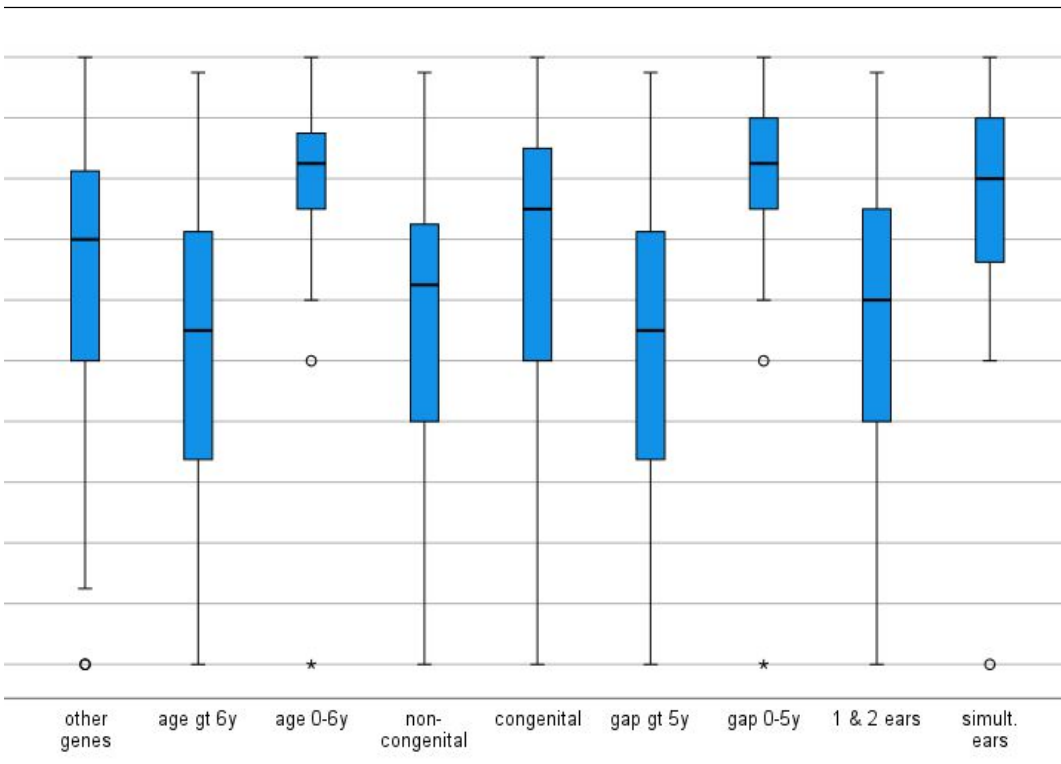

**Hypothesis Test Summary**

| Null Hypothesis                                                    | Test                                    | Sig. <sup>a,b</sup> | Decision                    |
|--------------------------------------------------------------------|-----------------------------------------|---------------------|-----------------------------|
| The distribution of Fb all is the same across categories of group. | Independent-Samples Kruskal-Wallis Test | 0.000               | Reject the null hypothesis. |

is displayed.

is displayed.

**Independent-Samples Wallis Test**

|                                |
|--------------------------------|
| Total N                        |
| Test Statistic                 |
| Degree Of Freedom              |
| Asymptotic Sig. (2-sided test) |

a. The test statistic ties.

**Pairwise Comparisons of group**

| Test Statistic | Std. Error | Std. Test Statistic (z) | Sig.  | Adj. Sig. <sup>a</sup> | n  |
|----------------|------------|-------------------------|-------|------------------------|----|
| -86.094        | 30.850     | -2.791                  | 0.005 | 0.24 n.s.              | 76 |
| 114.000        | 28.125     | 4.053                   | 0.000 | 0.002                  | 76 |

|                |               |               |              |                  |    |
|----------------|---------------|---------------|--------------|------------------|----|
| <b>53.889</b>  | <b>25.233</b> | <b>2.136</b>  | <b>0.033</b> | <b>1 n.s.</b>    | 76 |
| <b>115.481</b> | <b>28.125</b> | <b>4.106</b>  | <b>0.000</b> | <b>0.002</b>     | 76 |
| <b>-86.383</b> | <b>31.600</b> | <b>-2.734</b> | <b>0.006</b> | <b>0.28 n.s.</b> | 76 |
| -151.540       | 36.384        | -4.165        | 0.000        | 0.001            |    |
| -150.469       | 36.384        | -4.136        | 0.000        | 0.002            |    |
| -115.071       | 28.125        | -4.091        | 0.000        | 0.002            |    |
| 114.409        | 28.125        | 4.068         | 0.000        | 0.002            |    |
| -108.389       | 29.422        | -3.684        | 0.000        | 0.010            |    |
| 107.317        | 29.422        | 3.647         | 0.000        | 0.012            |    |
| 100.621        | 27.741        | 3.627         | 0.000        | 0.013            |    |
| 99.549         | 27.741        | 3.589         | 0.000        | 0.015            |    |
| -137.302       | 39.406        | -3.484        | 0.000        | 0.022            |    |
| -101.242       | 31.938        | -3.170        | 0.002        | 0.069            |    |
| -100.833       | 31.938        | -3.157        | 0.002        | 0.072            |    |
| -97.040        | 33.088        | -2.933        | 0.003        | 0.151            |    |
| -94.150        | 33.086        | -2.846        | 0.004        | 0.199            |    |
| 60.981         | 23.708        | 2.572         | 0.010        | 0.455            |    |
| -60.571        | 23.708        | -2.555        | 0.011        | 0.478            |    |
| 50.034         | 20.468        | 2.444         | 0.015        | 0.653            |    |
| 49.625         | 20.468        | 2.425         | 0.015        | 0.690            |    |
| -65.446        | 27.800        | -2.354        | 0.019        | 0.835            |    |
| -64.375        | 27.800        | -2.316        | 0.021        | 0.926            |    |
| -36.060        | 31.144        | -1.158        | 0.247        | 1.000            |    |
| -36.469        | 31.144        | -1.171        | 0.242        | 1.000            |    |
| -43.152        | 32.320        | -1.335        | 0.182        | 1.000            |    |
| -50.920        | 30.797        | -1.653        | 0.098        | 1.000            |    |
| 0.409          | 20.908        | 0.020         | 0.984        | 1.000            |    |
| 7.092          | 22.623        | 0.313         | 0.754        | 1.000            |    |
| -14.860        | 20.388        | -0.729        | 0.466        | 1.000            |    |
| -6.683         | 22.623        | -0.295        | 0.768        | 1.000            |    |
| -14.451        | 20.388        | -0.709        | 0.478        | 1.000            |    |
| -7.768         | 22.143        | -0.351        | 0.726        | 1.000            |    |
| 42.942         | 22.217        | 1.933         | 0.053        | 1.000            |    |

|         |        |        |       |       |
|---------|--------|--------|-------|-------|
| 35.174  | 19.936 | 1.764  | 0.078 | 1.000 |
| 46.121  | 23.250 | 1.984  | 0.047 | 1.000 |
| -10.946 | 23.320 | -0.469 | 0.639 | 1.000 |
| -51.208 | 31.651 | -1.618 | 0.106 | 1.000 |
| -40.262 | 33.837 | -1.190 | 0.234 | 1.000 |
| 53.429  | 30.265 | 1.765  | 0.077 | 1.000 |
| -54.500 | 30.265 | -1.801 | 0.072 | 1.000 |
| 13.167  | 37.066 | 0.355  | 0.722 | 1.000 |
| 14.238  | 37.066 | 0.384  | 0.701 | 1.000 |
| -1.071  | 33.837 | -0.032 | 0.975 | 1.000 |

hypothesis that the Sample 1 and Sample 2 distributions are the same.  
(2-sided tests) are displayed. The significance level is ,050.

have been adjusted by the Bonferroni correction for multiple tests.



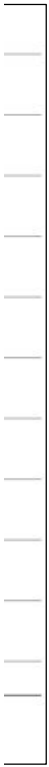

**mples Kruskal-  
t Summary**

380  
53,109<sup>a</sup>

9

0.000

: is adjusted for

| effect size r* | effect type |
|----------------|-------------|
| 0.32           | middle      |
| <b>0.46</b>    | middle      |

\* effect size Cohen's d:  $r=z/\sqrt{n}$

|             |        |
|-------------|--------|
| 0.24        | weak   |
| <b>0.47</b> | middle |
| 0.31        | middle |

## Descriptives

Fb all

|                | N   | Mean   | Std. Deviation | Std. Error | 95% Confidence Interval for Mean |             |
|----------------|-----|--------|----------------|------------|----------------------------------|-------------|
|                |     |        |                |            | Lower Bound                      | Upper Bound |
| neural genes   | 16  | 40.625 | 32.2942        | 8.0736     | 23.417                           | 57.833      |
| other genes    | 60  | 64.333 | 25.0079        | 3.2285     | 57.873                           | 70.794      |
| age 0-6        | 21  | 77.619 | 21.8872        | 4.7762     | 67.656                           | 87.582      |
| age gt 6       | 55  | 52.364 | 27.3414        | 3.6867     | 44.972                           | 59.755      |
| congenital     | 35  | 66.214 | 26.3208        | 4.4490     | 57.173                           | 75.256      |
| non-congenital | 41  | 53.476 | 28.7330        | 4.4873     | 44.406                           | 62.545      |
| gap 0-5        | 21  | 77.857 | 21.9984        | 4.8004     | 67.844                           | 87.871      |
| gap gt 5       | 55  | 52.273 | 27.2220        | 3.6706     | 44.914                           | 59.632      |
| 1 & 2 ears     | 61  | 55.492 | 27.6956        | 3.5461     | 48.399                           | 62.585      |
| simult ears    | 15  | 75.000 | 25.4074        | 6.5602     | 60.930                           | 89.070      |
| Total          | 380 | 59.342 | 28.0506        | 1.4390     | 56.513                           | 62.171      |

## Tests of Homogeneity of Variances

|        |                                      | Levene Statistic | df1 | df2     | Sig.  |
|--------|--------------------------------------|------------------|-----|---------|-------|
| Fb all | Based on Mean                        | 1.334            | 9   | 370     | 0.217 |
|        | Based on Median                      | 1.335            | 9   | 370     | 0.217 |
|        | Based on Median and with adjusted df | 1.335            | 9   | 362.800 | 0.217 |
|        | Based on trimmed mean                | 1.578            | 9   | 370     | 0.120 |

## ANOVA

Fb all

|                | Sum of Squares | df  | Mean Square | F     | Sig.         |
|----------------|----------------|-----|-------------|-------|--------------|
| Between Groups | 34386.918      | 9   | 3820.769    | 5.358 | <b>0.000</b> |
| Within Groups  | 263823.608     | 370 | 713.037     |       |              |
| Total          | 298210.526     | 379 |             |       |              |

### Welch-Test

## Robust Tests of Equality of Means

Fb all

|       | Statistic <sup>a</sup> | df1 | df2     | Sig.         |
|-------|------------------------|-----|---------|--------------|
| Welch | 5.731                  | 9   | 106.567 | <b>0.000</b> |

a. Asymptotically F distributed.

### Multiple Comparisons

Dependent Variable:

| (I) group  |                |                | Mean Difference<br>(I-J) | Std. Error           | Sig.   | 95% Confidence<br>Lower Bound |
|------------|----------------|----------------|--------------------------|----------------------|--------|-------------------------------|
| Bonferroni | neural genes   | other genes    | -23.7083                 | 7.5132               | 0.078  | -48.401                       |
|            |                | age 0-6        | -36,9940 <sup>†</sup>    | 8.8611               | 0.002  | -66.117                       |
|            |                | age gt 6       | -11.7386                 | 7.5848               | 1.000  | -36.667                       |
|            |                | congenital     | -25.5893                 | 8.0584               | 0.073  | -52.074                       |
|            |                | non-congenital | -12.8506                 | 7.8712               | 1.000  | -38.720                       |
|            |                | gap 0-5        | -37,2321 <sup>†</sup>    | 8.8611               | 0.001  | -66.355                       |
|            |                | gap gt 5       | -11.6477                 | 7.5848               | 1.000  | -36.576                       |
|            |                | 1 & 2 ears     | -14.8668                 | 7.5003               | 1.000  | -39.517                       |
|            |                | simult ears    | -34,3750 <sup>†</sup>    | 9.5969               | 0.017  | -65.916                       |
|            |                | other genes    | neural genes             | 23.7083              | 7.5132 | 0.078                         |
|            | age 0-6        |                | -13.2857                 | 6.7704               | 1.000  | -35.537                       |
|            | age gt 6       |                | 11.9697                  | 4.9848               | 0.757  | -4.413                        |
|            | congenital     |                | -1.8810                  | 5.6795               | 1.000  | -20.547                       |
|            | non-congenital |                | 10.8577                  | 5.4106               | 1.000  | -6.925                        |
|            | gap 0-5        |                | -13.5238                 | 6.7704               | 1.000  | -35.775                       |
|            | gap gt 5       |                | 12.0606                  | 4.9848               | 0.721  | -4.322                        |
|            | 1 & 2 ears     |                | 8.8415                   | 4.8552               | 1.000  | -7.116                        |
|            | simult ears    |                | -10.6667                 | 7.7084               | 1.000  | -36.001                       |
|            | age 0-6        |                | neural genes             | 36,9940 <sup>†</sup> | 8.8611 | 0.002                         |
|            |                | other genes    | 13.2857                  | 6.7704               | 1.000  | -8.966                        |
|            |                | age gt 6       | 25,2554 <sup>†</sup>     | 6.8497               | 0.012  | 2.743                         |
|            |                | congenital     | 11.4048                  | 7.3707               | 1.000  | -12.820                       |
|            |                | non-congenital | 24,1434 <sup>†</sup>     | 7.1656               | 0.037  | 0.593                         |
|            |                | gap 0-5        | -0.2381                  | 8.2406               | 1.000  | -27.322                       |
|            |                | gap gt 5       | 25,3463 <sup>†</sup>     | 6.8497               | 0.011  | 2.834                         |
|            |                | 1 & 2 ears     | 22.1272                  | 6.7560               | 0.052  | -0.077                        |
|            |                | simult ears    | 2.6190                   | 9.0272               | 1.000  | -27.049                       |
|            |                | age gt 6       | neural genes             | 11.7386              | 7.5848 | 1.000                         |
|            | other genes    |                | -11.9697                 | 4.9848               | 0.757  | -28.353                       |
|            | age 0-6        |                | -25,2554 <sup>†</sup>    | 6.8497               | 0.012  | -47.768                       |
|            | congenital     |                | -13.8506                 | 5.7738               | 0.762  | -32.827                       |
|            | non-congenital |                | -1.1120                  | 5.5096               | 1.000  | -19.220                       |
|            | gap 0-5        |                | -25,4935 <sup>†</sup>    | 6.8497               | 0.010  | -48.006                       |
|            | gap gt 5       |                | 0.0909                   | 5.0920               | 1.000  | -16.644                       |
|            | 1 & 2 ears     |                | -3.1282                  | 4.9652               | 1.000  | -19.447                       |

|                |                |                       |                      |        |         |
|----------------|----------------|-----------------------|----------------------|--------|---------|
|                | simult ears    | -22.6364              | 7.7782               | 0.172  | -48.200 |
| congenital     | neural genes   | 25.5893               | 8.0584               | 0.073  | -0.895  |
|                | other genes    | 1.8810                | 5.6795               | 1.000  | -16.785 |
|                | age 0-6        | -11.4048              | 7.3707               | 1.000  | -35.629 |
|                | age gt 6       | 13.8506               | 5.7738               | 0.762  | -5.125  |
|                | non-congenital | 12.7387               | 6.1452               | 1.000  | -7.458  |
|                | gap 0-5        | -11.6429              | 7.3707               | 1.000  | -35.867 |
|                | gap gt 5       | 13.9416               | 5.7738               | 0.731  | -5.035  |
|                | 1 & 2 ears     | 10.7225               | 5.6623               | 1.000  | -7.887  |
|                | simult ears    | -8.7857               | 8.2406               | 1.000  | -35.869 |
|                | non-congenital | neural genes          | 12.8506              | 7.8712 | 1.000   |
| other genes    |                | -10.8577              | 5.4106               | 1.000  | -28.640 |
| age 0-6        |                | -24,1434 <sup>†</sup> | 7.1656               | 0.037  | -47.694 |
| age gt 6       |                | 1.1120                | 5.5096               | 1.000  | -16.996 |
| congenital     |                | -12.7387              | 6.1452               | 1.000  | -32.935 |
| gap 0-5        |                | -24,3815 <sup>†</sup> | 7.1656               | 0.033  | -47.932 |
| gap gt 5       |                | 1.2029                | 5.5096               | 1.000  | -16.905 |
| 1 & 2 ears     |                | -2.0162               | 5.3926               | 1.000  | -19.739 |
| simult ears    |                | -21.5244              | 8.0577               | 0.355  | -48.007 |
| gap 0-5        |                | neural genes          | 37,2321 <sup>†</sup> | 8.8611 | 0.001   |
|                | other genes    | 13.5238               | 6.7704               | 1.000  | -8.728  |
|                | age 0-6        | 0.2381                | 8.2406               | 1.000  | -26.845 |
|                | age gt 6       | 25,4935 <sup>†</sup>  | 6.8497               | 0.010  | 2.981   |
|                | congenital     | 11.6429               | 7.3707               | 1.000  | -12.581 |
|                | non-congenital | 24,3815 <sup>†</sup>  | 7.1656               | 0.033  | 0.831   |
|                | gap gt 5       | 25,5844 <sup>†</sup>  | 6.8497               | 0.010  | 3.072   |
|                | 1 & 2 ears     | 22,3653 <sup>†</sup>  | 6.7560               | 0.046  | 0.161   |
|                | simult ears    | 2.8571                | 9.0272               | 1.000  | -26.811 |
|                | gap gt 5       | neural genes          | 11.6477              | 7.5848 | 1.000   |
| other genes    |                | -12.0606              | 4.9848               | 0.721  | -28.444 |
| age 0-6        |                | -25,3463 <sup>†</sup> | 6.8497               | 0.011  | -47.858 |
| age gt 6       |                | -0.0909               | 5.0920               | 1.000  | -16.826 |
| congenital     |                | -13.9416              | 5.7738               | 0.731  | -32.918 |
| non-congenital |                | -1.2029               | 5.5096               | 1.000  | -19.311 |
| gap 0-5        |                | -25,5844 <sup>†</sup> | 6.8497               | 0.010  | -48.097 |
| 1 & 2 ears     |                | -3.2191               | 4.9652               | 1.000  | -19.538 |
| simult ears    |                | -22.7273              | 7.7782               | 0.166  | -48.291 |
| 1 & 2 ears     |                | neural genes          | 14.8668              | 7.5003 | 1.000   |
|                | other genes    | -8.8415               | 4.8552               | 1.000  | -24.799 |
|                | age 0-6        | -22.1272              | 6.7560               | 0.052  | -44.331 |
|                | age gt 6       | 3.1282                | 4.9652               | 1.000  | -13.190 |
|                | congenital     | -10.7225              | 5.6623               | 1.000  | -29.332 |
|                | non-congenital | 2.0162                | 5.3926               | 1.000  | -15.707 |

|              |              |                |                       |         |       |         |
|--------------|--------------|----------------|-----------------------|---------|-------|---------|
|              |              | gap 0-5        | -22,3653 <sup>†</sup> | 6.7560  | 0.046 | -44.569 |
|              |              | gap gt 5       | 3.2191                | 4.9652  | 1.000 | -13.100 |
|              |              | simult ears    | -19.5082              | 7.6958  | 0.525 | -44.801 |
|              | simult ears  | neural genes   | 34,3750 <sup>†</sup>  | 9.5969  | 0.017 | 2.834   |
|              |              | other genes    | 10.6667               | 7.7084  | 1.000 | -14.668 |
|              |              | age 0-6        | -2.6190               | 9.0272  | 1.000 | -32.288 |
|              |              | age gt 6       | 22.6364               | 7.7782  | 0.172 | -2.927  |
|              |              | congenital     | 8.7857                | 8.2406  | 1.000 | -18.298 |
|              |              | non-congenital | 21.5244               | 8.0577  | 0.355 | -4.958  |
|              |              | gap 0-5        | -2.8571               | 9.0272  | 1.000 | -32.526 |
|              |              | gap gt 5       | 22.7273               | 7.7782  | 0.166 | -2.836  |
|              |              | 1 & 2 ears     | 19.5082               | 7.6958  | 0.525 | -5.785  |
| Games-Howell | neural genes | other genes    | -23.7083              | 8.6951  | 0.228 | -54.490 |
|              |              | age 0-6        | -36,9940 <sup>†</sup> | 9.3805  | 0.017 | -69.471 |
|              |              | age gt 6       | -11.7386              | 8.8755  | 0.937 | -42.901 |
|              |              | congenital     | -25.5893              | 9.2182  | 0.199 | -57.568 |
|              |              | non-congenital | -12.8506              | 9.2368  | 0.919 | -44.856 |
|              |              | gap 0-5        | -37,2321 <sup>†</sup> | 9.3929  | 0.016 | -69.742 |
|              |              | gap gt 5       | -11.6477              | 8.8688  | 0.940 | -42.796 |
|              |              | 1 & 2 ears     | -14.8668              | 8.8180  | 0.791 | -45.903 |
|              |              | simult ears    | -34.3750              | 10.4028 | 0.066 | -70.033 |
|              | other genes  | neural genes   | 23.7083               | 8.6951  | 0.228 | -7.073  |
|              |              | age 0-6        | -13.2857              | 5.7650  | 0.409 | -32.595 |
|              |              | age gt 6       | 11.9697               | 4.9005  | 0.312 | -3.858  |
|              |              | congenital     | -1.8810               | 5.4970  | 1.000 | -19.858 |
|              |              | non-congenital | 10.8577               | 5.5281  | 0.626 | -7.147  |
|              |              | gap 0-5        | -13.5238              | 5.7851  | 0.389 | -32.906 |
|              |              | gap gt 5       | 12.0606               | 4.8884  | 0.298 | -3.728  |
|              |              | 1 & 2 ears     | 8.8415                | 4.7956  | 0.706 | -6.624  |
|              |              | simult ears    | -10.6667              | 7.3116  | 0.894 | -36.381 |
|              | age 0-6      | neural genes   | 36,9940 <sup>†</sup>  | 9.3805  | 0.017 | 4.517   |
|              |              | other genes    | 13.2857               | 5.7650  | 0.409 | -6.024  |
|              |              | age gt 6       | 25,2554 <sup>†</sup>  | 6.0335  | 0.005 | 5.183   |
|              |              | congenital     | 11.4048               | 6.5273  | 0.763 | -10.236 |
|              |              | non-congenital | 24,1434 <sup>†</sup>  | 6.5535  | 0.018 | 2.469   |
|              |              | gap 0-5        | -0.2381               | 6.7717  | 1.000 | -22.908 |
|              |              | gap gt 5       | 25,3463 <sup>†</sup>  | 6.0237  | 0.004 | 5.302   |
|              |              | 1 & 2 ears     | 22,1272 <sup>†</sup>  | 5.9486  | 0.018 | 2.307   |
|              |              | simult ears    | 2.6190                | 8.1146  | 1.000 | -25.260 |
|              | age gt 6     | neural genes   | 11.7386               | 8.8755  | 0.937 | -19.424 |
|              |              | other genes    | -11.9697              | 4.9005  | 0.312 | -27.798 |
|              |              | age 0-6        | -25,2554 <sup>†</sup> | 6.0335  | 0.005 | -45.328 |
|              |              | congenital     | -13.8506              | 5.7780  | 0.343 | -32.695 |

|                |                |                       |        |       |         |
|----------------|----------------|-----------------------|--------|-------|---------|
|                | non-congenital | -1.1120               | 5.8076 | 1.000 | -19.989 |
|                | gap 0-5        | -25,4935 <sup>+</sup> | 6.0528 | 0.004 | -45.635 |
|                | gap gt 5       | 0.0909                | 5.2024 | 1.000 | -16.717 |
|                | 1 & 2 ears     | -3.1282               | 5.1153 | 1.000 | -19.639 |
|                | simult ears    | -22.6364              | 7.5251 | 0.131 | -48.829 |
| congenital     | neural genes   | 25.5893               | 9.2182 | 0.199 | -6.389  |
|                | other genes    | 1.8810                | 5.4970 | 1.000 | -16.097 |
|                | age 0-6        | -11.4048              | 6.5273 | 0.763 | -33.045 |
|                | age gt 6       | 13.8506               | 5.7780 | 0.343 | -4.993  |
|                | non-congenital | 12.7387               | 6.3190 | 0.591 | -7.878  |
|                | gap 0-5        | -11.6429              | 6.5451 | 0.745 | -33.345 |
|                | gap gt 5       | 13.9416               | 5.7678 | 0.331 | -4.871  |
|                | 1 & 2 ears     | 10.7225               | 5.6893 | 0.679 | -7.837  |
|                | simult ears    | -8.7857               | 7.9265 | 0.980 | -36.013 |
| non-congenital | neural genes   | 12.8506               | 9.2368 | 0.919 | -19.155 |
|                | other genes    | -10.8577              | 5.5281 | 0.626 | -28.863 |
|                | age 0-6        | -24,1434 <sup>+</sup> | 6.5535 | 0.018 | -45.818 |
|                | age gt 6       | 1.1120                | 5.8076 | 1.000 | -17.765 |
|                | congenital     | -12.7387              | 6.3190 | 0.591 | -33.355 |
|                | gap 0-5        | -24,3815 <sup>+</sup> | 6.5712 | 0.017 | -46.118 |
|                | gap gt 5       | 1.2029                | 5.7974 | 1.000 | -17.642 |
|                | 1 & 2 ears     | -2.0162               | 5.7193 | 1.000 | -20.607 |
|                | simult ears    | -21.5244              | 7.9481 | 0.218 | -48.781 |
| gap 0-5        | neural genes   | 37,2321 <sup>+</sup>  | 9.3929 | 0.016 | 4.723   |
|                | other genes    | 13.5238               | 5.7851 | 0.389 | -5.859  |
|                | age 0-6        | 0.2381                | 6.7717 | 1.000 | -22.432 |
|                | age gt 6       | 25,4935 <sup>+</sup>  | 6.0528 | 0.004 | 5.352   |
|                | congenital     | 11.6429               | 6.5451 | 0.745 | -10.060 |
|                | non-congenital | 24,3815 <sup>+</sup>  | 6.5712 | 0.017 | 2.645   |
|                | gap gt 5       | 25,5844 <sup>+</sup>  | 6.0430 | 0.004 | 5.470   |
|                | 1 & 2 ears     | 22,3653 <sup>+</sup>  | 5.9681 | 0.017 | 2.475   |
|                | simult ears    | 2.8571                | 8.1290 | 1.000 | -25.062 |
| gap gt 5       | neural genes   | 11.6477               | 8.8688 | 0.940 | -19.500 |
|                | other genes    | -12.0606              | 4.8884 | 0.298 | -27.849 |
|                | age 0-6        | -25,3463 <sup>+</sup> | 6.0237 | 0.004 | -45.391 |
|                | age gt 6       | -0.0909               | 5.2024 | 1.000 | -16.899 |
|                | congenital     | -13.9416              | 5.7678 | 0.331 | -32.754 |
|                | non-congenital | -1.2029               | 5.7974 | 1.000 | -20.048 |
|                | gap 0-5        | -25,5844 <sup>+</sup> | 6.0430 | 0.004 | -45.698 |
|                | 1 & 2 ears     | -3.2191               | 5.1037 | 1.000 | -19.693 |
|                | simult ears    | -22.7273              | 7.5173 | 0.127 | -48.902 |
| 1 & 2 ears     | neural genes   | 14.8668               | 8.8180 | 0.791 | -16.169 |
|                | other genes    | -8.8415               | 4.7956 | 0.706 | -24.308 |

|             |                |                       |         |       |         |
|-------------|----------------|-----------------------|---------|-------|---------|
|             | age 0-6        | -22,1272 <sup>†</sup> | 5.9486  | 0.018 | -41.947 |
|             | age gt 6       | 3.1282                | 5.1153  | 1.000 | -13.383 |
|             | congenital     | -10.7225              | 5.6893  | 0.679 | -29.282 |
|             | non-congenital | 2.0162                | 5.7193  | 1.000 | -16.574 |
|             | gap 0-5        | -22,3653 <sup>†</sup> | 5.9681  | 0.017 | -42.256 |
|             | gap gt 5       | 3.2191                | 5.1037  | 1.000 | -13.255 |
|             | simult ears    | -19.5082              | 7.4572  | 0.265 | -45.541 |
| simult ears | neural genes   | 34.3750               | 10.4028 | 0.066 | -1.283  |
|             | other genes    | 10.6667               | 7.3116  | 0.894 | -15.047 |
|             | age 0-6        | -2.6190               | 8.1146  | 1.000 | -30.498 |
|             | age gt 6       | 22.6364               | 7.5251  | 0.131 | -3.556  |
|             | congenital     | 8.7857                | 7.9265  | 0.980 | -18.442 |
|             | non-congenital | 21.5244               | 7.9481  | 0.218 | -5.732  |
|             | gap 0-5        | -2.8571               | 8.1290  | 1.000 | -30.777 |
|             | gap gt 5       | 22.7273               | 7.5173  | 0.127 | -3.447  |
|             | 1 & 2 ears     | 19.5082               | 7.4572  | 0.265 | -6.525  |

\*. The mean difference is significant at the 0.05 level.



| Minimum | Maximum |
|---------|---------|
| 0.0     | 95.0    |
| 0.0     | 100.0   |
| 0.0     | 100.0   |
| 0.0     | 97.5    |
| 0.0     | 100.0   |
| 0.0     | 97.5    |
| 0.0     | 100.0   |
| 0.0     | 97.5    |
| 0.0     | 97.5    |
| 0.0     | 100.0   |
| 0.0     | 100.0   |

| Fb all | Eta-squared     |
|--------|-----------------|
|        | Epsilon-squared |
|        | Omega-squared   |
|        | Fixed-effect    |
|        | Omega-squared   |
|        | Random-effect   |

a. Eta-squared and Epsilon-squared are

ance Interval

| Upper Bound |
|-------------|
| 0.985       |
| -7.871      |
| 13.189      |
| 0.895       |
| 13.019      |
| -8.109      |
| 13.280      |
| 9.783       |
| -2.834      |
| 48.401      |
| 8.966       |
| 28.353      |
| 16.785      |
| 28.640      |
| 8.728       |
| 28.444      |
| 24.799      |
| 14.668      |
| 66.117      |
| 35.537      |
| 47.768      |
| 35.629      |
| 47.694      |
| 26.845      |
| 47.858      |
| 44.331      |
| 32.288      |
| 36.667      |
| 4.413       |
| -2.743      |
| 5.125       |
| 16.996      |
| -2.981      |
| 16.826      |
| 13.190      |

|        |
|--------|
| 2.927  |
| 52.074 |
| 20.547 |
| 12.820 |
| 32.827 |
| 32.935 |
| 12.581 |
| 32.918 |
| 29.332 |
| 18.298 |
| 38.720 |
| 6.925  |
| -0.593 |
| 19.220 |
| 7.458  |
| -0.831 |
| 19.311 |
| 15.707 |
| 4.958  |
| 66.355 |
| 35.775 |
| 27.322 |
| 48.006 |
| 35.867 |
| 47.932 |
| 48.097 |
| 44.569 |
| 32.526 |
| 36.576 |
| 4.322  |
| -2.834 |
| 16.644 |
| 5.035  |
| 16.905 |
| -3.072 |
| 13.100 |
| 2.836  |
| 39.517 |
| 7.116  |
| 0.077  |
| 19.447 |
| 7.887  |
| 19.739 |

|        |
|--------|
| -0.161 |
| 19.538 |
| 5.785  |
| 65.916 |
| 36.001 |
| 27.049 |
| 48.200 |
| 35.869 |
| 48.007 |
| 26.811 |
| 48.291 |
| 44.801 |
| 7.073  |
| -4.517 |
| 19.424 |
| 6.389  |
| 19.155 |
| -4.723 |
| 19.500 |
| 16.169 |
| 1.283  |
| 54.490 |
| 6.024  |
| 27.798 |
| 16.097 |
| 28.863 |
| 5.859  |
| 27.849 |
| 24.308 |
| 15.047 |
| 69.471 |
| 32.595 |
| 45.328 |
| 33.045 |
| 45.818 |
| 22.432 |
| 45.391 |
| 41.947 |
| 30.498 |
| 42.901 |
| 3.858  |
| -5.183 |
| 4.993  |

|        |
|--------|
| 17.765 |
| -5.352 |
| 16.899 |
| 13.383 |
| 3.556  |
| 57.568 |
| 19.858 |
| 10.236 |
| 32.695 |
| 33.355 |
| 10.060 |
| 32.754 |
| 29.282 |
| 18.442 |
| 44.856 |
| 7.147  |
| -2.469 |
| 19.989 |
| 7.878  |
| -2.645 |
| 20.048 |
| 16.574 |
| 5.732  |
| 69.742 |
| 32.906 |
| 22.908 |
| 45.635 |
| 33.345 |
| 46.118 |
| 45.698 |
| 42.256 |
| 30.777 |
| 42.796 |
| 3.728  |
| -5.302 |
| 16.717 |
| 4.871  |
| 17.642 |
| -5.470 |
| 13.255 |
| 3.447  |
| 45.903 |
| 6.624  |

|        |
|--------|
| -2.307 |
| 19.639 |
| 7.837  |
| 20.607 |
| -2.475 |
| 19.693 |
| 6.525  |
| 70.033 |
| 36.381 |
| 25.260 |
| 48.829 |
| 36.013 |
| 48.781 |
| 25.062 |
| 48.902 |
| 45.541 |

### IOVA Effect Sizes<sup>a</sup>

| Point Estimate | 95% Confidence Interval |       |
|----------------|-------------------------|-------|
|                | Lower                   | Upper |
| <b>0.115</b>   | 0.044                   | 0.158 |
| 0.094          | 0.021                   | 0.138 |
| 0.094          | 0.020                   | 0.137 |
| 0.011          | 0.002                   | 0.017 |

re estimated based on the fixed-effect model.

### Univariate Analysis of Vari

Dependent Variable:

| Source          | Type III Sum of Squares |
|-----------------|-------------------------|
| Corrected Model | 34386,918 <sup>a</sup>  |
| Intercept       | 1091541.130             |
| group           | 34386.918               |
| Error           | 263823.608              |
| Total           | 1636375.000             |
| Corrected Total | 298210.526              |

a. R Squared = ,115 (Adjusted R Squared = ,097)

b. Computed using alpha = ,05

Dependent Variable:

| Parameter  | B              |
|------------|----------------|
| Intercept  | 75.000         |
| [group=1]  | -34.375        |
| [group=2]  | -10.667        |
| [group=3]  | 2.619          |
| [group=4]  | -22.636        |
| [group=5]  | -8.786         |
| [group=6]  | -21.524        |
| [group=7]  | 2.857          |
| [group=8]  | -22.727        |
| [group=9]  | -19.508        |
| [group=10] | 0 <sup>a</sup> |

a. This parameter is set to zero because of collinearity with the other parameters in the model.

b. Computed using alpha = ,05

### Between-Sub

|       |
|-------|
| group |
| 1     |
| 2     |
| 3     |

|    |
|----|
| 4  |
| 5  |
| 6  |
| 7  |
| 8  |
| 9  |
| 10 |











iance

### Tests of Between-Subjects Effects

| df  | Mean Square | F        | Sig.  | Partial Eta Squared | Noncent. Parameter | Observed Power <sup>b</sup> |
|-----|-------------|----------|-------|---------------------|--------------------|-----------------------------|
| 9   | 3820.769    | 5.358    | 0.000 | <b>0.115</b>        | 48.226             | 1.000                       |
| 1   | 1091541.130 | 1530.834 | 0.000 | 0.805               | 1530.834           | 1.000                       |
| 9   | 3820.769    | 5.358    | 0.000 | 0.115               | 48.226             | 1.000                       |
| 370 | 713.037     |          |       |                     |                    |                             |
| 380 |             |          |       |                     |                    |                             |
| 379 |             |          |       |                     |                    |                             |

ared = ,094)

### Parameter Estimates

| Std. Error | t      | Sig.         | 95% Confidence Interval |             | Partial Eta Squared | Noncent. Parameter |
|------------|--------|--------------|-------------------------|-------------|---------------------|--------------------|
|            |        |              | Lower Bound             | Upper Bound |                     |                    |
| 6.895      | 10.878 | 0.000        | 61.442                  | 88.558      | 0.242               | 10.878             |
| 9.597      | -3.582 | <b>0.000</b> | -53.246                 | -15.504     | <b>0.034</b>        | 3.582              |
| 7.708      | -1.384 | 0.167        | -25.824                 | 4.491       | 0.005               | 1.384              |
| 9.027      | 0.290  | 0.772        | -15.132                 | 20.370      | 0.000               | 0.290              |
| 7.778      | -2.910 | <b>0.004</b> | -37.931                 | -7.341      | <b>0.022</b>        | 2.910              |
| 8.241      | -1.066 | 0.287        | -24.990                 | 7.419       | 0.003               | 1.066              |
| 8.058      | -2.671 | <b>0.008</b> | -37.369                 | -5.680      | <b>0.019</b>        | 2.671              |
| 9.027      | 0.317  | 0.752        | -14.894                 | 20.608      | 0.000               | 0.317              |
| 7.778      | -2.922 | <b>0.004</b> | -38.022                 | -7.432      | <b>0.023</b>        | 2.922              |
| 7.696      | -2.535 | <b>0.012</b> | -34.641                 | -4.375      | <b>0.017</b>        | 2.535              |

se it is redundant.

### Descriptive Statistics

#### jects Factors

| Value Label  | N  |
|--------------|----|
| neural genes | 16 |
| other genes  | 60 |
| age 0-6      | 21 |

Dependent Variable:

| group        | Mean   | Std. Deviation | N  |
|--------------|--------|----------------|----|
| neural genes | 40.625 | 32.2942        | 16 |
| other genes  | 64.333 | 25.0079        | 60 |
| age 0-6      | 77.619 | 21.8872        | 21 |

|                |    |
|----------------|----|
| age gt 6       | 55 |
| congenital     | 35 |
| non-congenital | 41 |
| gap 0-5        | 21 |
| gap gt 5       | 55 |
| 1 & 2 ears     | 61 |
| simult ears    | 15 |

|                |        |         |    |
|----------------|--------|---------|----|
| age gt 6       | 52.364 | 27.3414 | 55 |
| congenital     | 66.214 | 26.3208 | 35 |
| non-congenital | 53.476 | 28.7330 | 41 |
| gap 0-5        | 77.857 | 21.9984 | 21 |
| gap gt 5       | 52.273 | 27.2220 | 55 |
| 1 & 2 ears     | 55.492 | 27.6956 | 61 |
| simult ears    | 75.000 | 25.4074 | 15 |
|                |        |         |    |











Observed Power<sup>b</sup>

1.000

0.947

0.281

0.060

0.827

0.186

0.759

0.061

0.830

0.715
