# Supplementary figures and images for: Variability in Cochlear Implantation Outcomes in a Large German Cohort With a Genetic Etiology of Hearing Loss
Source: PubMed Central journal article supplement — Ear Hear. 2023 Jul 13;44(6):1464–84. doi: 10.1097/AUD.0000000000001386 (PMC10583923; doi:10.1097/aud.0000000000001386), 2023-07-13

### Gene Distribution Implanted Ears (n=123)

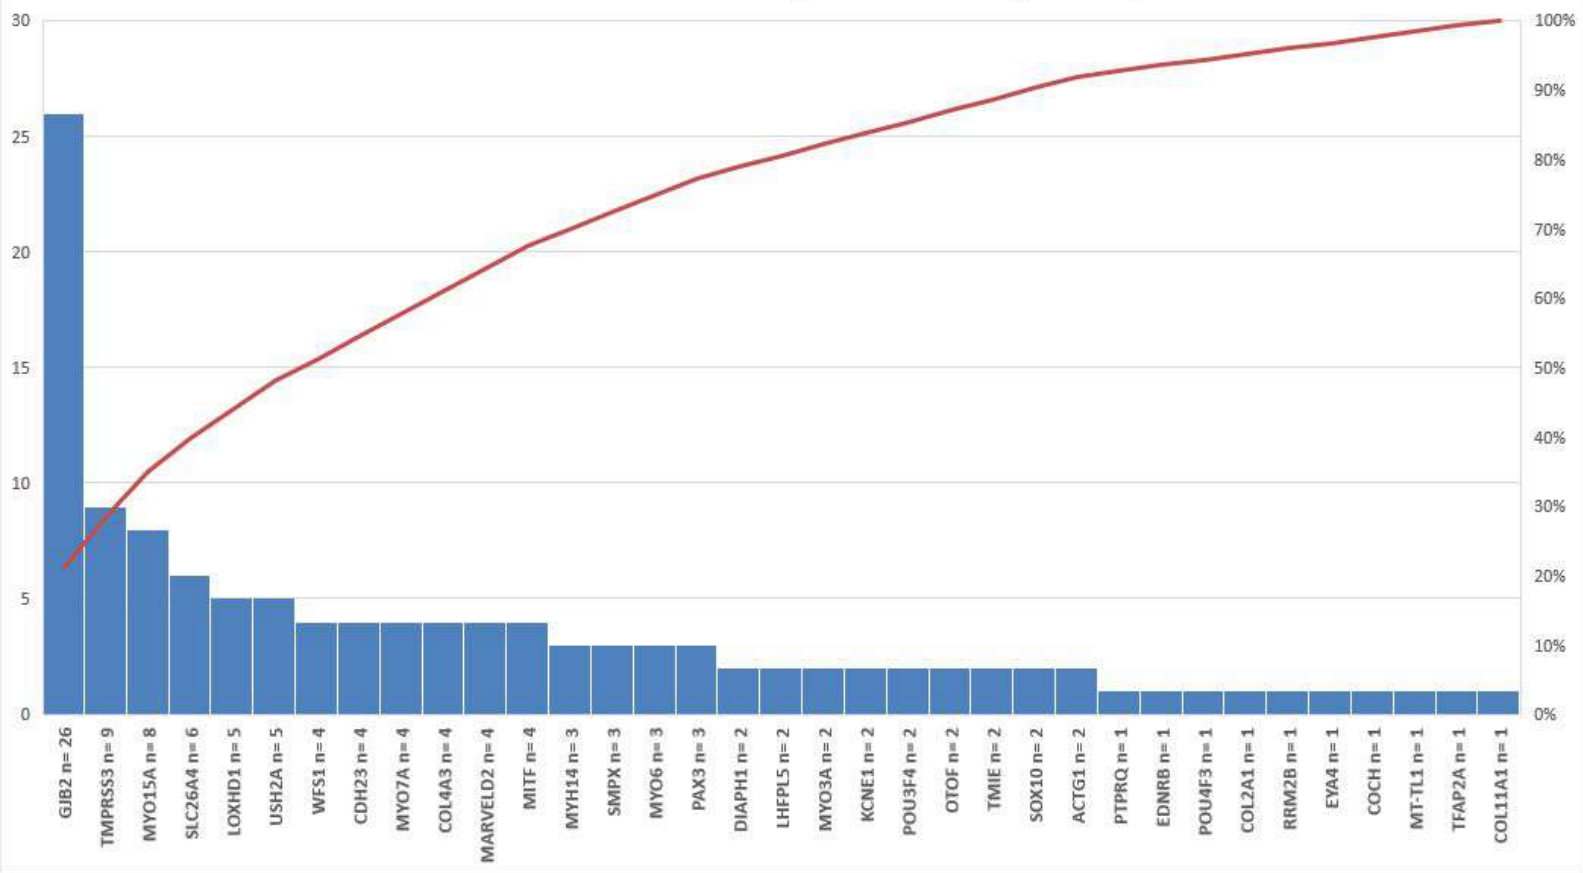

Supplement: aud-44-1464-s006.pdf [file aud-44-1464-s006.pdf]

SDC 4A Figure

Speech in Quiet - Monosyllables 80 dB (n = 113)

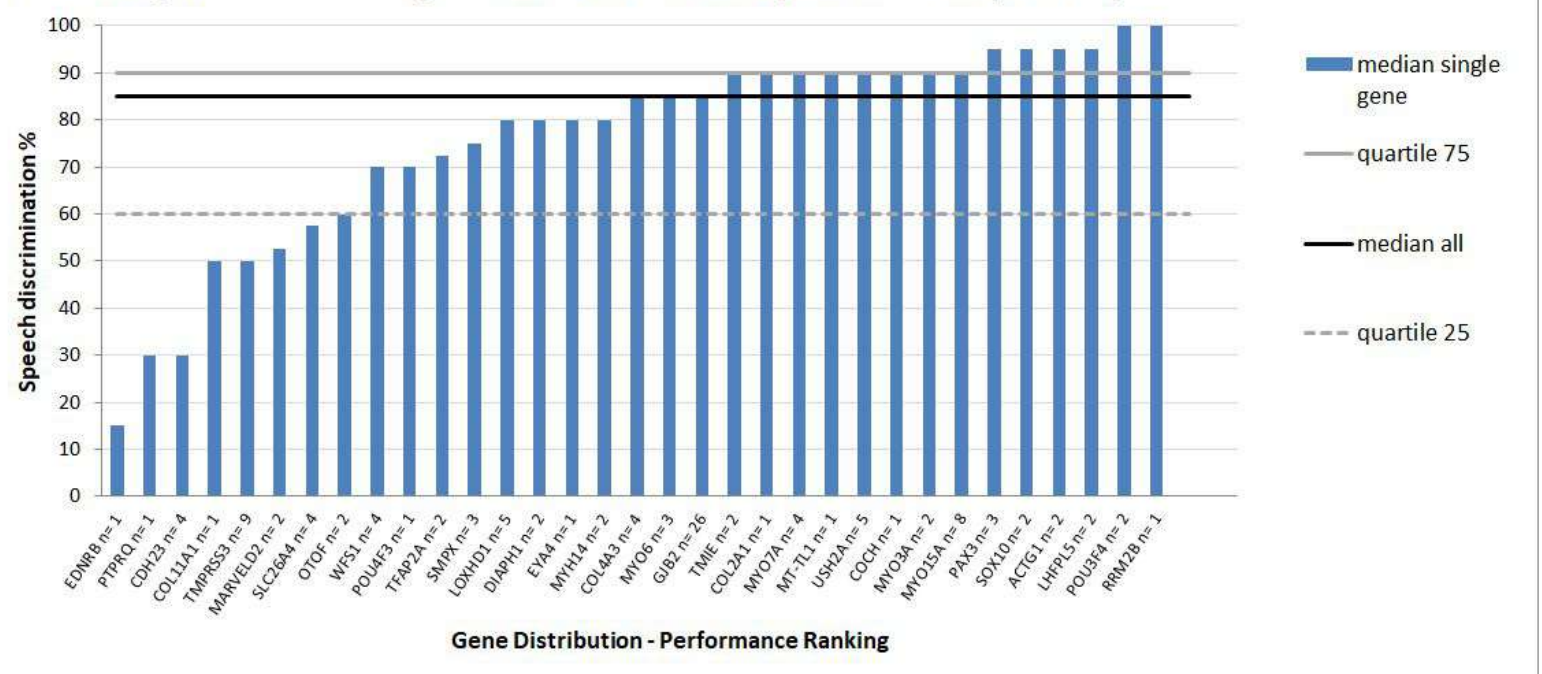

SDC 4B Figure

speech in quiet - monosyllables 80 dB (n = 113)

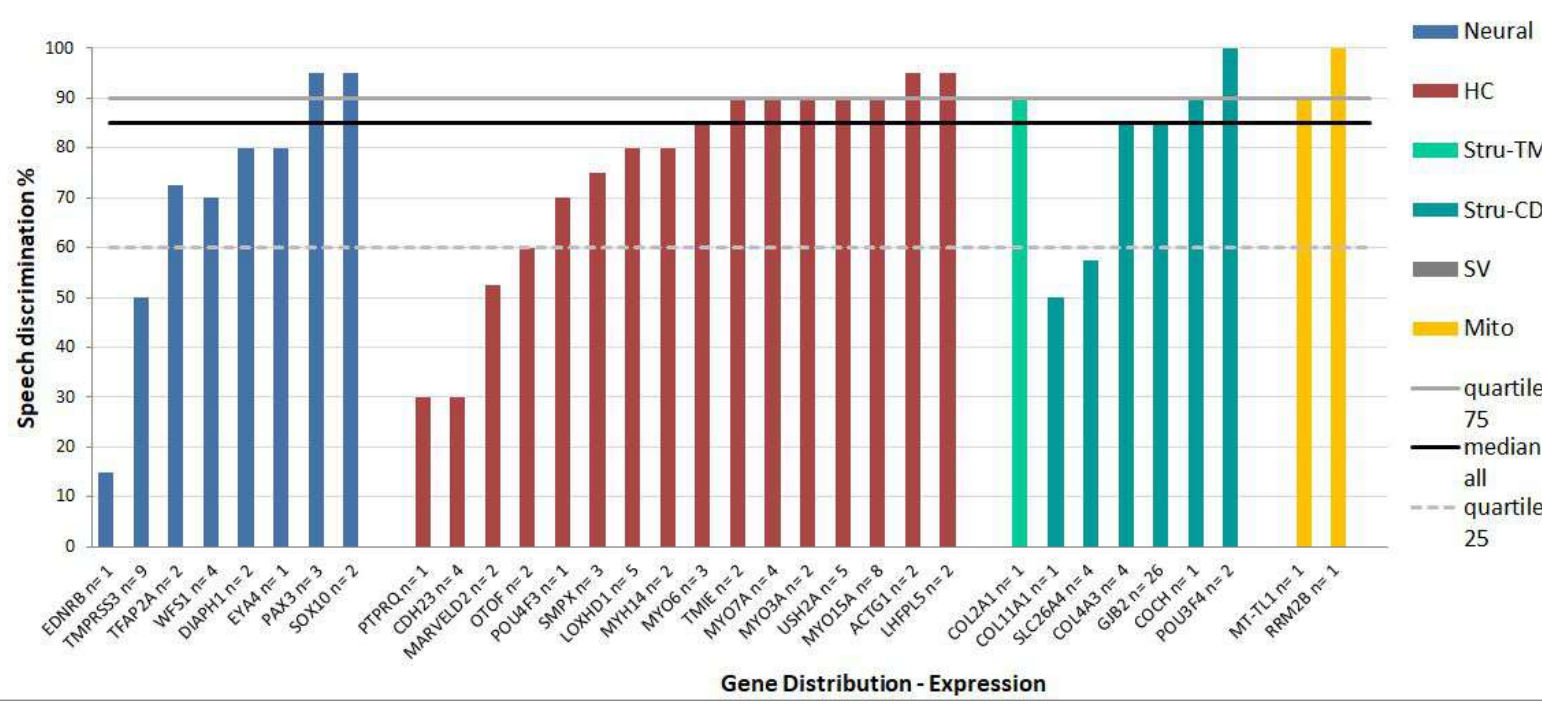

Supplement: aud-44-1464-s007.pdf [file aud-44-1464-s007.pdf]
